# Supplementary material for: Slip to π Ru: structural distortions due to metal-iminoxolene π bonding
Source: Royal Society of Chemistry journal article supplement (doi:10.1039/d3cc02943c), 2023-01-01
Supplement: d3cc02943c1.pdf [file d3cc02943c1.pdf]

## Electronic Supplementary Information for

### Slip to $\pi$ Ru: Structural distortions due to metal-iminoxolene $\pi$ bonding

Patricia Rose H. Ayson and Seth N. Brown\*

251 Nieuwland Science Hall, Department of Chemistry and Biochemistry  
University of Notre Dame, Notre Dame, IN 46556-5670 USA

#### Table of Contents

|                                                                                                                                                                                                   |     |
|---------------------------------------------------------------------------------------------------------------------------------------------------------------------------------------------------|-----|
| <b>I. Procedures and preparative details</b>                                                                                                                                                      | S4  |
| <b>II. X-ray crystallography</b>                                                                                                                                                                  |     |
| Crystallographic details                                                                                                                                                                          | S16 |
| <b>Table S1.</b> Crystal data for <i>cis</i> -(Diso) <sub>2</sub> RuCl <sub>2</sub> and <i>cis</i> -(Diso) <sub>2</sub> OsCl <sub>2</sub>                                                         | S18 |
| <b>Table S2.</b> Crystal data for <i>trans</i> -(Diso) <sub>2</sub> RuCl <sub>2</sub> and <i>trans</i> -(Diso) <sub>2</sub> OsCl <sub>2</sub>                                                     | S19 |
| <b>Table S3.</b> Crystal data for CF <sub>3</sub> Tio and <i>trans</i> -(CF <sub>3</sub> Tio) <sub>2</sub> RuCl <sub>2</sub>                                                                      | S20 |
| <b>Table S4.</b> Crystal data for (Diso) <sub>2</sub> Ru(PPh <sub>3</sub> ) • 2 CH <sub>2</sub> Cl <sub>2</sub> and (Diso) <sub>2</sub> Os(PPh <sub>3</sub> ) • 2 CH <sub>2</sub> Cl <sub>2</sub> | S21 |
| <b>Table S5.</b> Metrical data for <i>cis</i> -(Diso) <sub>2</sub> RuCl <sub>2</sub> and <i>cis</i> -(Diso) <sub>2</sub> OsCl <sub>2</sub>                                                        | S22 |
| <b>Table S6.</b> Metrical data for <i>trans</i> -(iminoxolene) <sub>2</sub> RuCl <sub>2</sub>                                                                                                     | S23 |
| <b>Table S7.</b> Metrical data for <i>trans</i> -(iminoxolene) <sub>2</sub> OsCl <sub>2</sub>                                                                                                     | S24 |
| <b>Table S8.</b> Metrical data for (Diso) <sub>2</sub> Ru(PPh <sub>3</sub> ) and (Diso) <sub>2</sub> Os(PPh <sub>3</sub> )                                                                        | S25 |
| <b>Figure S1.</b> Thermal ellipsoid plot of <i>cis</i> -(Diso) <sub>2</sub> OsCl <sub>2</sub>                                                                                                     | S26 |
| <b>Figure S2.</b> Thermal ellipsoid plot of <i>trans</i> -(Diso) <sub>2</sub> OsCl <sub>2</sub>                                                                                                   | S27 |
| <b>Figure S3.</b> Thermal ellipsoid plot of CF <sub>3</sub> Tio                                                                                                                                   | S27 |
| <b>Figure S4.</b> Thermal ellipsoid plot of <i>trans</i> -(CF <sub>3</sub> Tio) <sub>2</sub> RuCl <sub>2</sub>                                                                                    | S28 |
| <b>Figure S5.</b> Thermal ellipsoid plot of (Diso) <sub>2</sub> Os(PPh <sub>3</sub> ) • 2 CH <sub>2</sub> Cl <sub>2</sub>                                                                         | S29 |
| <b>III. <sup>1</sup>H NMR spectra</b>                                                                                                                                                             |     |
| <b>Figure S6.</b> <sup>1</sup> H NMR spectrum of <i>cis</i> -(Diso) <sub>2</sub> RuCl <sub>2</sub>                                                                                                | S30 |
| <b>Figure S7.</b> <sup>1</sup> H NMR spectrum of <i>trans</i> -(Diso) <sub>2</sub> RuCl <sub>2</sub>                                                                                              | S30 |
| <b>Figure S8.</b> <sup>1</sup> H NMR spectrum of <i>cis</i> -(Diso) <sub>2</sub> OsCl <sub>2</sub>                                                                                                | S31 |
| <b>Figure S9.</b> <sup>1</sup> H NMR spectrum of <i>trans</i> -(Diso) <sub>2</sub> OsCl <sub>2</sub>                                                                                              | S31 |
| <b>Figure S10.</b> <sup>1</sup> H NMR spectrum of CF <sub>3</sub> Tio                                                                                                                             | S32 |
| <b>Figure S11.</b> <sup>1</sup> H NMR spectrum of <i>trans</i> -(CF <sub>3</sub> Tio) <sub>2</sub> RuCl <sub>2</sub>                                                                              | S32 |
| <b>Figure S12.</b> <sup>1</sup> H NMR spectrum of <i>cis</i> -(CF <sub>3</sub> Tio) <sub>2</sub> RuCl <sub>2</sub>                                                                                | S33 |
| <b>Figure S13.</b> <sup>1</sup> H NMR spectrum of (Diso) <sub>2</sub> Ru(PPh <sub>3</sub> )                                                                                                       | S33 |
| <b>Figure S14.</b> <sup>1</sup> H NMR spectrum of (Diso) <sub>2</sub> Os(PPh <sub>3</sub> )                                                                                                       | S34 |
| <b>IV. <sup>13</sup>C{<sup>1</sup>H} NMR spectra</b>                                                                                                                                              |     |
| <b>Figure S15.</b> <sup>13</sup> C{ <sup>1</sup> H} NMR spectrum of <i>cis</i> -(Diso) <sub>2</sub> RuCl <sub>2</sub>                                                                             | S35 |
| <b>Figure S16.</b> <sup>13</sup> C{ <sup>1</sup> H} NMR spectrum of <i>trans</i> -(Diso) <sub>2</sub> RuCl <sub>2</sub>                                                                           | S35 |
| <b>Figure S17.</b> <sup>13</sup> C{ <sup>1</sup> H} NMR spectrum of <i>cis</i> -(Diso) <sub>2</sub> OsCl <sub>2</sub>                                                                             | S36 |
| <b>Figure S18.</b> <sup>13</sup> C{ <sup>1</sup> H} NMR spectrum of CF <sub>3</sub> Tio                                                                                                           | S36 |

|                                                                                  |                                                                                                                              |     |
|----------------------------------------------------------------------------------|------------------------------------------------------------------------------------------------------------------------------|-----|
| Figure S19.                                                                      | $^{13}\text{C}\{^1\text{H}\}$ NMR spectrum of 80:20 <i>cis-/trans</i> -( $\text{CF}_3\text{Tio}$ ) $_2\text{RuCl}_2$ mixture | S37 |
| <b>V. <math>^{19}\text{F}\{^1\text{H}\}</math> NMR spectra</b>                   |                                                                                                                              |     |
| Figure S20.                                                                      | $^{19}\text{F}\{^1\text{H}\}$ NMR spectrum of $\text{CF}_3\text{Tio}$                                                        | S38 |
| Figure S21.                                                                      | $^{19}\text{F}\{^1\text{H}\}$ NMR spectrum of <i>trans</i> -( $\text{CF}_3\text{Tio}$ ) $_2\text{RuCl}_2$                    | S38 |
| Figure S22.                                                                      | $^{19}\text{F}\{^1\text{H}\}$ NMR spectrum of 80:20 <i>cis-/trans</i> -( $\text{CF}_3\text{Tio}$ ) $_2\text{RuCl}_2$ mixture | S39 |
| <b>VI. <math>^{31}\text{P}\{^1\text{H}\}</math> NMR spectra</b>                  |                                                                                                                              |     |
| Figure S23.                                                                      | $^{31}\text{P}\{^1\text{H}\}$ NMR spectrum of ( $\text{Diso}$ ) $_2\text{Ru}(\text{PPh}_3)$                                  | S40 |
| Figure S24.                                                                      | $^{31}\text{P}\{^1\text{H}\}$ NMR spectrum of ( $\text{Diso}$ ) $_2\text{Os}(\text{PPh}_3)$                                  | S40 |
| <b>VII. Infrared spectra</b>                                                     |                                                                                                                              |     |
| Figure S25.                                                                      | Infrared spectrum of <i>cis</i> -( $\text{Diso}$ ) $_2\text{RuCl}_2$                                                         | S41 |
| Figure S26.                                                                      | Infrared spectrum of <i>trans</i> -( $\text{Diso}$ ) $_2\text{RuCl}_2$                                                       | S41 |
| Figure S27.                                                                      | Infrared spectrum of <i>cis</i> -( $\text{Diso}$ ) $_2\text{OsCl}_2$                                                         | S41 |
| Figure S28.                                                                      | Infrared spectrum of $\text{CF}_3\text{Tio}$                                                                                 | S42 |
| Figure S29.                                                                      | Infrared spectrum of <i>trans</i> -( $\text{CF}_3\text{Tio}$ ) $_2\text{RuCl}_2$                                             | S42 |
| Figure S30.                                                                      | Infrared spectrum of 80:20 <i>cis-/trans</i> -( $\text{CF}_3\text{Tio}$ ) $_2\text{RuCl}_2$ mixture                          | S42 |
| Figure S31.                                                                      | Infrared spectrum of ( $\text{Diso}$ ) $_2\text{Ru}(\text{PPh}_3)$                                                           | S43 |
| Figure S32.                                                                      | Infrared spectrum of ( $\text{Diso}$ ) $_2\text{Os}(\text{PPh}_3)$                                                           | S43 |
| <b>VIII. Optical spectra</b>                                                     |                                                                                                                              |     |
| Figure S33.                                                                      | UV-Vis spectrum of <i>cis</i> -( $\text{Diso}$ ) $_2\text{RuCl}_2$                                                           | S44 |
| Figure S34.                                                                      | UV-Vis spectrum of <i>trans</i> -( $\text{Diso}$ ) $_2\text{RuCl}_2$                                                         | S44 |
| Figure S35.                                                                      | UV-Vis spectrum of <i>cis</i> -( $\text{Diso}$ ) $_2\text{OsCl}_2$                                                           | S45 |
| Figure S36.                                                                      | UV-Vis spectrum of $\text{CF}_3\text{Tio}$                                                                                   | S45 |
| Figure S37.                                                                      | UV-Vis-NIR spectrum of <i>trans</i> -( $\text{CF}_3\text{Tio}$ ) $_2\text{RuCl}_2$                                           | S46 |
| Figure S38.                                                                      | UV-Vis-NIR spectrum of 80:20 <i>cis-/trans</i> -( $\text{CF}_3\text{Tio}$ ) $_2\text{RuCl}_2$ mixture                        | S46 |
| Figure S39.                                                                      | UV-Vis spectrum of ( $\text{Diso}$ ) $_2\text{Ru}(\text{PPh}_3)$                                                             | S47 |
| Figure S40.                                                                      | UV-Vis spectrum of ( $\text{Diso}$ ) $_2\text{Os}(\text{PPh}_3)$                                                             | S47 |
| <b>IX. Cyclic voltammetry</b>                                                    |                                                                                                                              |     |
| Figure S41.                                                                      | CV of <i>cis</i> -( $\text{Diso}$ ) $_2\text{RuCl}_2$                                                                        | S48 |
| Figure S42.                                                                      | CV of <i>trans</i> -( $\text{Diso}$ ) $_2\text{RuCl}_2$                                                                      | S48 |
| Figure S43.                                                                      | CV of <i>cis</i> -( $\text{Diso}$ ) $_2\text{OsCl}_2$                                                                        | S49 |
| Figure S44.                                                                      | CV of ( $\text{Diso}$ ) $_2\text{Ru}(\text{PPh}_3)$                                                                          | S49 |
| Figure S45.                                                                      | CV of ( $\text{Diso}$ ) $_2\text{Os}(\text{PPh}_3)$                                                                          | S50 |
| <b>X. Variable-temperature NMR spectroscopy</b>                                  |                                                                                                                              |     |
| Figure S46.                                                                      | Variable-temperature NMR of <i>trans</i> -( $\text{Diso}$ ) $_2\text{RuCl}_2$                                                | S51 |
| Figure S47.                                                                      | Variable-temperature NMR of <i>trans</i> -( $\text{Diso}$ ) $_2\text{OsCl}_2$                                                | S51 |
| Figure S48.                                                                      | Variable-temperature NMR of ( $\text{Diso}$ ) $_2\text{Ru}(\text{PPh}_3)$                                                    | S52 |
| Figure S49.                                                                      | Variable-temperature NMR of ( $\text{Diso}$ ) $_2\text{Os}(\text{PPh}_3)$                                                    | S52 |
| Figure S50.                                                                      | Eyring plot for dynamics of <i>trans</i> -( $\text{Diso}$ ) $_2\text{MCl}_2$                                                 | S53 |
| Figure S51.                                                                      | Eyring plot for dynamics of ( $\text{Diso}$ ) $_2\text{M}(\text{PPh}_3)$                                                     | S53 |
| <b>XI. Energies, MOS values, and Cartesian coordinates from DFT calculations</b> |                                                                                                                              |     |
| A.                                                                               | <i>cis</i> - $\alpha$ -( $\text{ap}$ ) $_2\text{RuCl}_2$ [N atoms mutually trans]                                            | S54 |
| B.                                                                               | <i>cis</i> - $\alpha$ -( $\text{ap}$ ) $_2\text{OsCl}_2$ [N atoms mutually trans]                                            | S55 |

|                   |                                                                                                                        |     |
|-------------------|------------------------------------------------------------------------------------------------------------------------|-----|
| C.                | <i>trans</i> -(ap) <sub>2</sub> RuCl <sub>2</sub> (minimum-energy, C <sub>s</sub> symmetry)                            | S56 |
| D.                | <i>trans</i> -(ap) <sub>2</sub> RuCl <sub>2</sub> (constrained to C <sub>2</sub> symmetry)                             | S57 |
| E.                | <i>trans</i> -(ap) <sub>2</sub> RuCl <sub>2</sub> (constrained to C <sub>2h</sub> or C <sub>i</sub> symmetry)          | S58 |
| F.                | <i>trans</i> -(ap) <sub>2</sub> OsCl <sub>2</sub> (minimum-energy, C <sub>s</sub> symmetry)                            | S59 |
| G.                | <i>trans</i> -(ap) <sub>2</sub> OsCl <sub>2</sub> (constrained to C <sub>2</sub> symmetry)                             | S60 |
| H.                | <i>trans</i> -(ap) <sub>2</sub> OsCl <sub>2</sub> (constrained to C <sub>2h</sub> symmetry)                            | S61 |
| I.                | (ap) <sub>2</sub> Ru(PMe <sub>3</sub> )                                                                                | S62 |
| J.                | (ap) <sub>2</sub> Ru(PMe <sub>3</sub> ) (with (ap) <sub>2</sub> Ru(P) fragment constrained to C <sub>2</sub> symmetry) | S63 |
| K.                | (ap) <sub>2</sub> Os(PMe <sub>3</sub> ) (with (ap) <sub>2</sub> Os(P) fragment constrained to C <sub>2</sub> symmetry) | S64 |
| <b>References</b> |                                                                                                                        | S66 |

## I. Procedures and preparative details

**General Procedures.** Except as noted, all procedures were carried out in an inert-atmosphere glovebox. Deuterated solvents were obtained from Cambridge Isotope Labs. CD<sub>2</sub>Cl<sub>2</sub> and CDCl<sub>3</sub> were dried over 4 Å molecular sieves, followed by CaH<sub>2</sub>, and were stored in the drybox before use. CF<sub>2</sub>Cl<sub>2</sub> was purchased from SynQuest Laboratories Inc. CDFCl<sub>2</sub> was prepared by the literature method.<sup>S1</sup> Dry protio solvents were purchased as anhydrous grade and stored in the drybox before use. Di-μ-chlorobis[(*p*-cymene)chlororuthenium(II)] was purchased from Strem Chemicals or from TCI Chemicals and used as received, while the analogous osmium complex was prepared from H<sub>2</sub>O<sub>s</sub>Cl<sub>6</sub> and α-terpinene.<sup>S2</sup> Diso (*N*-(2,6-diisopropylphenyl)-4,6-di-*tert*-butyl-2-imino-*o*-benzoquinone)<sup>S3</sup> and 3,5,3',5'-tetrakis(trifluoromethyl)-2'-amino-*m*-terphenyl<sup>S4</sup> were prepared as described in the literature. <sup>1</sup>H and <sup>13</sup>C {<sup>1</sup>H} NMR spectra were measured using a Bruker Avance DPX-400 or -500 spectrometer and were referenced to the solvent residual signals. <sup>19</sup>F {<sup>1</sup>H} NMR spectra were referenced to CFC<sub>3</sub> while <sup>31</sup>P {<sup>1</sup>H} NMR spectra were referenced to external 85% H<sub>3</sub>PO<sub>4</sub>. Infrared spectra were recorded on a JASCO FT/IR-6300 spectrometer. UV-visible spectra were measured in a 1-cm quartz cell on a Thermo Scientific Evolution Array spectrophotometer. Elemental analyses were performed by Midwest Microanalytical Laboratories (Indianapolis, IN, USA) or by Robertson Microlit Inc (Ledgewood, NJ, USA).

***Cis*- and *trans*-dichlorobis(*N*-(2,6-diisopropylphenyl)-3,5-di-*tert*-butyl-1,2-benzoiminoxolene)ruthenium, (Diso)<sub>2</sub>RuCl<sub>2</sub>.** A mixture of 238.8 mg {(*p*-cymene)RuCl<sub>2</sub>}<sub>2</sub> (0.780 mmol Ru) and 992.3 mg Diso (2.614 mmol, 3.4 equiv) is dissolved in 12 mL dry CHCl<sub>3</sub> in the glovebox. The mixture is placed in a 20 mL scintillation vial with a stirbar, sealed, and heated in a 74 °C oil bath for 2 d. The vial is then opened to the air and the volatiles removed on

a rotary evaporator. The residue is treated with 5 mL hexane and, after standing 10 min, the hexane is decanted away from the solid, which is then washed with 3 mL additional hexane, which is combined with the first extract. The hexane extract is allowed to stand at room temperature overnight to yield a second crop of crude solid. The first crop of solid is mostly the purple *cis* isomer ( $R_f = 0.50$ ,  $\text{CH}_2\text{Cl}_2$ ), while the second crop is mostly the *trans* isomer ( $R_f = 0.80$ ,  $\text{CH}_2\text{Cl}_2$ ). The two crops of solid are dissolved in  $\text{CH}_2\text{Cl}_2$  and eluted (separately) through short silica gel columns with dichloromethane. The green and purple bands are collected in fractions, which are checked for purity by TLC; any fractions containing a mixture of the two isomers are rechromatographed. The solvent is evaporated from the two purified isomers. The slower-moving purple material is then slurried in 3 mL  $\text{CH}_3\text{CN}$ , suction filtered, washed with 3 mL  $\text{CH}_3\text{CN}$ , and air-dried 30 min to give 0.2143 g *cis*-**(Diso)<sub>2</sub>RuCl<sub>2</sub>** (30%).  $^1\text{H}$  NMR ( $\text{CDCl}_3$ ):  $\delta$  0.93 (d, 6.6 Hz, 6H,  $\text{CH}(\text{CH}_3)_2$ ), 0.95 (d, 6.6 Hz, 6H,  $\text{CH}(\text{CH}_3)_2$ ), 1.18 (s, 18H,  $^t\text{Bu}$ ), 1.19 (d, 6.6 Hz, 6H,  $\text{CH}(\text{CH}_3)_2$ ), 1.25 (s, 18H,  $^t\text{Bu}$ ), 1.27 (d, 6.8 Hz, 6H,  $\text{CH}(\text{CH}_3)_2$ ), 2.86 (sept, 6.6 Hz, 2H,  $\text{CH}(\text{CH}_3)_2$ ), 3.09 (sept, 6.6 Hz, 2H,  $\text{CH}(\text{CH}_3)_2$ ), 6.82 (d, 2.0 Hz, 2H, iminoxolene 3- or 5-H), 7.26 (dd, 7.7, 1.3 Hz, 2H, Ar 3- or 5-H), 7.28 (dd, 7.5, 1.3 Hz, 2H, Ar 3- or 5-H), 7.42 (t, 7.7 Hz, 2H, Ar 4-H), 7.84 (d, 2.0 Hz, iminoxolene 3- or 5-H).  $^{13}\text{C}\{^1\text{H}\}$  NMR ( $\text{CDCl}_3$ ):  $\delta$  24.07 ( $\text{CH}(\text{CH}_3)_2$ ), 24.71 ( $\text{CH}(\text{CH}_3)_2$ ), 24.82 ( $\text{CH}(\text{CH}_3)_2$ ), 26.29 ( $\text{CH}(\text{CH}_3)_2$ ), 28.47 ( $\text{CH}(\text{CH}_3)_2$ ), 28.62 ( $\text{CH}(\text{CH}_3)_2$ ), 29.63 ( $\text{C}(\text{CH}_3)_3$ ), 30.35 ( $\text{C}(\text{CH}_3)_3$ ), 35.34 ( $\text{C}(\text{CH}_3)_3$ ), 35.42 ( $\text{C}(\text{CH}_3)_3$ ), 115.14, 123.27, 124.94, 127.65, 128.69, 140.95, 141.04, 144.73, 147.05, 150.42, 163.64, 185.25 (CO). IR (ATR,  $\text{cm}^{-1}$ ): 3062 (w), 2965 (m), 2864 (m), 1590 (w), 1519 (m), 1463 (m), 1398 (w), 1377 (m), 1359 (s), 1327 (w), 1291 (s), 1257 (s), 1240 (s), 1206 (m), 1158 (m), 1100 (m), 1056 (w), 1029 (m), 993 (m), 935 (w), 904 (m), 872 (m), 825 (w), 797 (s), 784 (w), 767 (w), 740 (s). UV-

Vis-NIR (CH<sub>2</sub>Cl<sub>2</sub>):  $\lambda_{\max}$  = 747 nm ( $\epsilon$  = 10500 L mol<sup>-1</sup> cm<sup>-1</sup>), 566 (4460), 330 (4200). Anal.

Calcd for C<sub>52</sub>H<sub>74</sub>Cl<sub>2</sub>N<sub>2</sub>O<sub>2</sub>Ru: C, 67.08; H, 8.01; N, 3.01. Found: C, 66.93; H, 7.93; N, 2.94.

The faster-eluting green fraction is slurried in hexane (3 mL), suction filtered, washed with 3 mL hexane, and air-dried 20 min to give 0.1076 g ***trans*-(Diso)<sub>2</sub>RuCl<sub>2</sub>** (15%). <sup>1</sup>H NMR (CD<sub>2</sub>Cl<sub>2</sub>):  $\delta$  0.94 (d, 6.8 Hz, 12H, CH(CH<sub>3</sub>)<sub>2</sub>), 1.09 (d, 6.6 Hz, 12H, CH(CH<sub>3</sub>)<sub>2</sub>), 1.10 (s, 18H, <sup>t</sup>Bu), 1.22 (s, 18H, <sup>t</sup>Bu), 2.71 (sept, 6.7 Hz, 4H, CH(CH<sub>3</sub>)<sub>2</sub>), 6.81 (d, 2.0 Hz, 2H, iminoxolene 3- or 5-H), 7.12 (d, 7.8 Hz, 4H, Ar 3,5-H), 7.42 (t, 7.8 Hz, 2H, Ar 4-H), 7.94 (d, 2.0 Hz, 2H, iminoxolene 3- or 5-H). <sup>13</sup>C{<sup>1</sup>H} NMR (CD<sub>2</sub>Cl<sub>2</sub>):  $\delta$  24.34 (CH(CH<sub>3</sub>)<sub>2</sub>), 25.48 (CH(CH<sub>3</sub>)<sub>2</sub>), 28.79 (C(CH<sub>3</sub>)<sub>3</sub>), 28.89 (CH(CH<sub>3</sub>)<sub>2</sub>), 30.46 (C(CH<sub>3</sub>)<sub>3</sub>), 35.35 (C(CH<sub>3</sub>)<sub>3</sub>), 36.14 (C(CH<sub>3</sub>)<sub>3</sub>), 115.48, 124.63 (Ar 3,5-C), 125.52, 128.75, 140.17, 148.46, 148.90, 150.49, 168.90, 183.26 (CO). IR (ATR, cm<sup>-1</sup>): 3086 (w), 3063 (w), 2960 (s), 2927 (w), 2906 (w), 2865 (w), 1598 (w), 1523 (m), 1480 (m), 1465 (m), 1396 (w), 1356 (s), 1327 (w), 1297 (s), 1265 (s), 1252 (m), 1240 (m), 1207 (w), 1160 (s), 1105 (m), 1096 (m), 1057 (w), 1042 (w), 1026 (m), 993 (m), 953 (w), 933 (w), 913 (m), 906 (m), 876 (w), 867 (w), 825 (w), 796 (m), 791 (w), 778 (w), 767 (w), 740 (m), 712 (w), 692 (w), 674 (w), 661 (w). UV-Vis-NIR (CH<sub>2</sub>Cl<sub>2</sub>):  $\lambda_{\max}$  = 962 nm ( $\epsilon$  = 4800 L mol<sup>-1</sup> cm<sup>-1</sup>), 743 (16000), 523 (sh, 3600), 455 (sh, 4600), 355 (7100). Anal. Calcd for C<sub>52</sub>H<sub>74</sub>Cl<sub>2</sub>N<sub>2</sub>O<sub>2</sub>Ru: C, 67.08; H, 8.01; N, 3.01. Found: C, 66.79; H, 7.88; N, 3.07.

***Cis*- and *trans*-dichlorobis(*N*-(2,6-diisopropylphenyl)-3,5-di-*tert*-butyl-1,2-benzoiminoxolene)osmium, (Diso)<sub>2</sub>OsCl<sub>2</sub>**. To a glass bomb are added 1.0 g {(*p*-cymene)OsCl<sub>2</sub>}<sub>2</sub> (2.5 mmol Os), 3.79 g Diso (9.98 mmol, 3.9 equiv), 70 mL CHCl<sub>3</sub>, and a stirbar. The bomb is sealed with a Teflon valve and taken out of the glovebox and heated with stirring in a 75 °C oil bath. After 1 d, the bomb is opened to the air and the reaction mixture transferred to a round-bottom flask. The solvent is evaporated using a rotary evaporator. The

purple residue is dissolved in 60:40 cyclohexane:CH<sub>2</sub>Cl<sub>2</sub> and eluted through a silica gel column using this solvent mixture. The fast-moving green fraction containing the *trans* isomer is collected, then the eluent is changed to 100% CH<sub>2</sub>Cl<sub>2</sub> to elute the *cis* isomer as a purple band. The purple fraction is evaporated using the rotary evaporator and the residue slurried in 7 mL of hexanes. After 1 h, the purple crystals are collected through a frit by vacuum filtration to give 162.1 mg of *cis*-(**Diso**)<sub>2</sub>OsCl<sub>2</sub> (5%). <sup>1</sup>H NMR (CD<sub>2</sub>Cl<sub>2</sub>): δ 0.85 (d, 6.8 Hz, 6H, CH(CH<sub>3</sub>)<sub>2</sub>), 1.10 (d, 6.7 Hz, 6H, CH(CH<sub>3</sub>)<sub>2</sub>), 1.23 (s, 18H, <sup>t</sup>Bu), 1.29 (d, 6.6 Hz, 6H, CH(CH<sub>3</sub>)<sub>2</sub>), 1.34 (s, 18H, <sup>t</sup>Bu), 1.39 (d, 6.6 Hz, 6H, CH(CH<sub>3</sub>)<sub>2</sub>), 2.55 (sept, 6.7 Hz, 2H, CH(CH<sub>3</sub>)<sub>2</sub>), 2.59 (sept, 6.7 Hz, 2H, CH(CH<sub>3</sub>)<sub>2</sub>), 3.87 (d, 1.7 Hz, 2H, iminoxolene 3- or 5-H), 4.78 (d, 1.8 Hz, iminoxolene 3- or 5-H), 7.44 (t, 7.7 Hz, 2H, Ar 4-H), 7.87 (d, 7.7 Hz, 2H, Ar 3- or 5-H), 8.09 (d, 7.7 Hz, 2H, Ar 3- or 5-H). <sup>13</sup>C {<sup>1</sup>H} NMR (CD<sub>2</sub>Cl<sub>2</sub>): δ 24.42 (2C, CH(CH<sub>3</sub>)<sub>2</sub>), 25.23, 26.11, 27.89, 28.00, 28.23 (C(CH<sub>3</sub>)<sub>3</sub>), 31.82 (C(CH<sub>3</sub>)<sub>3</sub>), 33.20 (C(CH<sub>3</sub>)<sub>3</sub>), 35.65 (C(CH<sub>3</sub>)<sub>3</sub>), 109.17, 124.21, 126.59, 127.07, 128.85, 129.10, 136.65, 139.87, 144.98, 157.31, 160.38, 186.60 (CO). IR (evapd film, cm<sup>-1</sup>): 3061 (w), 2965 (s), 2926 (m), 2864 (m), 1584 (w), 1544 (w), 1524 (m), 1462 (m), 1439 (w), 1395 (w), 1377 (w), 1360 (m), 1324 (w), 1317 (w), 1303 (w), 1282 (w), 1247 (m), 1231 (s), 1198 (m), 1156 (m), 1109 (w), 1055 (w), 1028 (w), 996 (w), 934 (w), 909 (w), 897 (w), 971 (w), 823 (w), 798 (w), 773 (w), 768 (w), 741 (w), 647 (w). UV-Vis (CH<sub>2</sub>Cl<sub>2</sub>): λ<sub>max</sub> = 817 nm (sh, ε = 2300 L mol<sup>-1</sup> cm<sup>-1</sup>), 602 (11200), 500 (9600), 365 (sh, 3900). Anal. Calcd for C<sub>52</sub>H<sub>74</sub>Cl<sub>2</sub>N<sub>2</sub>O<sub>2</sub>Os: C, 61.21; H, 7.31; N, 2.75. Found: C, 61.14; H, 7.02; N, 2.76.

The green fraction is evaporated using a rotary evaporator. The green residue is dissolved in hexanes and passed through a silica gel column. The column is eluted with hexanes to collect a yellow fraction, then the eluent is changed to 50:50 hexanes:CHCl<sub>3</sub> to collect the desired blue fraction. After evaporation of the solvent, the blue residue is crystallized from CH<sub>2</sub>Cl<sub>2</sub>/CH<sub>3</sub>OH

to give 10 mg *trans*-(Diso)<sub>2</sub>OsCl<sub>2</sub> (0.4% yield). The isolated material is contaminated with a small amount of a paramagnetic impurity, as judged by <sup>1</sup>H NMR. <sup>1</sup>H NMR (CD<sub>2</sub>Cl<sub>2</sub>): δ 0.90 (d, 6.7 Hz, 12H, CH(CH<sub>3</sub>)<sub>2</sub>), 1.05 (d, 6.7 Hz, 12H, CH(CH<sub>3</sub>)<sub>2</sub>), 1.16 (s, 18H, <sup>t</sup>Bu), 1.37 (s, 18H, <sup>t</sup>Bu), 2.30 (sept, 7 Hz, 4H, CH(CH<sub>3</sub>)<sub>2</sub>), 7.07 (d, 2 Hz, 2H, iminoxolene 3- or 5-H), 7.27 (d, 8 Hz, 4H, Ar 3,5-H), 7.46 (t, 8 Hz, 2H, Ar 4-H), 7.47 (d, 2 Hz, 2H, iminoxolene 3- or 5-H).

***N*-2'-(3,5,3'',5''-tetrakis(trifluoromethyl)-*m*-terphenyl)-4,6-di-*tert*-butyl-2-iminobenzoquinone, CF<sub>3</sub>Tio.** Into a 20-mL scintillation vial in the air are weighed 1.0984 g 3,5,3'',5''-tetrakis(trifluoromethyl)-2'-amino-*m*-terphenyl (2.12 mmol) and 0.5019 g 3,5-di-*tert*-butyl-1,2-benzoquinone (2.28 mmol, 1.07 equiv). After adding 10 mL glacial acetic acid, the vial is securely capped with a Teflon-lined cap and the mixture shaken until everything dissolves. After standing two days at room temperature, the dark red solution is added to a round-bottom flask and the acetic acid removed on the rotary evaporator. The residue is dissolved in ~10 mL heptane and the heptane removed on the rotary evaporator (in order to remove the last traces of CH<sub>3</sub>COOH via the heptane/acetic acid azeotrope). The residue is then dissolved in a minimum of hexane and loaded onto a plug of silica gel. The silica is eluted with 20% CH<sub>2</sub>Cl<sub>2</sub>/hexane, and the dark red band collected in fractions which are checked for purity by TLC. Any of the early fractions that are contaminated by faster-moving colorless impurities are combined and rerun through a plug of silica gel to remove the impurities. The pure fractions are combined and stripped down on the rotovap to give a red-brown foam, which is scraped into a vial to give 1.0386 g CF<sub>3</sub>Tio (68%). Two isomers are observed in a 1.6 : 1 ratio in CDCl<sub>3</sub>. <sup>1</sup>H NMR (CDCl<sub>3</sub>): Major isomer δ 0.96 (s, 9H, <sup>t</sup>Bu), 1.17 (s, 9H, <sup>t</sup>Bu), 5.76 (d, 2.1 Hz, 1H, iminoquinone 3- or 5-H), 6.73 (d, 2.1 Hz, 1H, iminoquinone 3- or 5-H), 7.42 (t, 8.2 Hz, 1H, terphenyl 5'-H), 7.52 (d, 7.6 Hz, 2H, terphenyl 4',6'-H), 7.75 (s, 2H, terphenyl 4,4''-H), 7.79 (s,



4H, terphenyl 2,6,2'',6''-H). Minor isomer  $\delta$  0.97 (s, 9H, <sup>t</sup>Bu), 1.11 (s, 9H, <sup>t</sup>Bu), 6.30 (d, 2.0 Hz, 1H, iminoquinone 3- or 5-H), 6.75 (d, 2.2 Hz, 1H, iminoquinone 3- or 5-H), 7.33 (t, 7.6 Hz, 1H, terphenyl 5'-H), 7.45 (d, 7.5 Hz, 2H, terphenyl 4',6'-H), 7.73 (s, 2H, terphenyl 4,4''-H), 7.77 (s, 4H, terphenyl 2,6,2'',6''-H). <sup>13</sup>C{<sup>1</sup>H} NMR (CDCl<sub>3</sub>):  $\delta$  28.22 (C[CH<sub>3</sub>]<sub>3</sub>, major isomer), 28.36 (C[CH<sub>3</sub>]<sub>3</sub>, minor isomer), 29.06 (C[CH<sub>3</sub>]<sub>3</sub>, minor isomer), 29.18 (C[CH<sub>3</sub>]<sub>3</sub>, major isomer), 35.13 (C[CH<sub>3</sub>]<sub>3</sub>, minor isomer), 35.46 (C[CH<sub>3</sub>]<sub>3</sub>, major isomer), 35.48 (C[CH<sub>3</sub>]<sub>3</sub>, minor isomer), 35.62 (C[CH<sub>3</sub>]<sub>3</sub>, minor isomer), 113.60, 120.81 (sept, <sup>3</sup>J<sub>CF</sub> = 4 Hz, terphenyl 4,4''-C, minor isomer), 121.07 (sept, <sup>3</sup>J<sub>CF</sub> = 4 Hz, terphenyl 4,4''-C, major isomer), 123.42 (q, <sup>1</sup>J<sub>CF</sub> = 273 Hz, CF<sub>3</sub>, major isomer), 123.52 (q, <sup>1</sup>J<sub>CF</sub> = 273 Hz, CF<sub>3</sub>, minor isomer), 123.69, 124.42, 125.59, 126.18, 128.84, 129.88 (q, <sup>3</sup>J<sub>CF</sub> = 3 Hz, terphenyl 2,6,2'',6''-C, minor isomer), 129.99 (q, <sup>3</sup>J<sub>CF</sub> = 3 Hz, terphenyl 2,6,2'',6''-C, major isomer), 130.91, 131.50 (q, <sup>2</sup>J<sub>CF</sub> = 33 Hz, terphenyl 3,5,3'',5''-C, minor isomer), 131.73 (q, <sup>2</sup>J<sub>CF</sub> = 33 Hz, terphenyl 3,5,3'',5''-C, minor isomer), 132.80, 134.66, 141.01, 141.60, 146.29, 147.54, 149.47, 149.54, 155.35, 156.78, 157.29, 158.20, 178.76 (C=O, minor isomer), 182.10 (C=O, major isomer). <sup>19</sup>F{<sup>1</sup>H} NMR (CDCl<sub>3</sub>):  $\delta$  -63.38. IR (evapd film, cm<sup>-1</sup>): 3065 (w), 2964 (m), 2912 (w), 2864 (w), 1665 (w), 1618 (w), 1575 (w), 1546 (w), 1474 (w), 1450 (w), 1369 (s), 1274 (s), 1173 (s), 1135 (s), 1054 (w), 1021 (w), 963 (w), 892 (m), 858 (w), 844 (w), 801 (w), 787 (w), 782 (w), 768 (w), 744 (w), 739 (w), 706 (m), 782 (m), 658 (w). UV-Vis (CH<sub>2</sub>Cl<sub>2</sub>):  $\lambda_{\max}$  = 409 nm ( $\epsilon$  = 4600 L mol<sup>-1</sup> cm<sup>-1</sup>), 304 (11000). Anal. Calcd for C<sub>36</sub>H<sub>29</sub>F<sub>12</sub>NO: C, 60.09; H, 4.06; N, 1.95. Found: C, 59.30; H, 4.11; N, 1.94.

***Cis-* and *trans*-dichlorobis(*N*-2'-(3,5,3'',5''-tetrakis(trifluoromethyl)-*m*-terphenyl)-3,5-di-*tert*-butyl-1,2-benzoiminoxolene)ruthenium, (CF<sub>3</sub>Tio)<sub>2</sub>RuCl<sub>2</sub>.** A mixture of 180 mg {(cymene)RuCl<sub>2</sub>}<sub>2</sub> (0.588 mmol Ru) and 921 mg CF<sub>3</sub>Tio (1.280 mmol, 2.18 equiv) is dissolved in 15 mL dry toluene in the glovebox. The mixture is placed in a 20 mL scintillation vial with a

stirbar, sealed, and heated with stirring in a 110 °C oil bath for 4 d. The vial is then opened to the air and the volatiles removed on a rotary evaporator. 7 mL of CHCl<sub>3</sub> is added to the residue and the mixture allowed to stand for 1 hr. The insoluble material is collected by suction filtration and washed with 3 × 10 mL of CHCl<sub>3</sub> to afford pure ***trans*-(CF<sub>3</sub>Tio)<sub>2</sub>RuCl<sub>2</sub>** (84 mg, 9%). <sup>1</sup>H NMR (CD<sub>2</sub>Cl<sub>2</sub>): δ 1.16 (s, 18H, <sup>t</sup>Bu), 1.32 (s, 18H, <sup>t</sup>Bu), 7.13 (d, 1.8 Hz, 2H, iminoxolene 3- or 5-H), 7.27 (d, 7.7 Hz, 4H, Ar 4',6'-H), 7.38 (d, 1.8 Hz, 2H, iminoxolene 3- or 5-H), 7.49 (d, 1.6 Hz, 8H, Ar 2,6,2'',6''-H) 7.51 (t, 7.9 Hz, 2H, Ar 5'-H), 7.60 (t, 1.5 Hz, 4H, Ar 4,4''-H). The pure *trans* isomer is too insoluble for <sup>13</sup>C spectroscopy. <sup>19</sup>F {<sup>1</sup>H} NMR (CD<sub>2</sub>Cl<sub>2</sub>): δ -63.27 (s, 24F). IR (ATR, cm<sup>-1</sup>): 2969 (w), 2912 (w), 2867 (w), 1372 (m), 1355 (w), 1290 (w), 1279 (s), 1175 (m), 1124 (s), 1098 (w), 1074 (w), 1025 (w), 992 (w), 943 (w), 904 (m), 895 (m), 873 (w), 847, (w), 819 (w), 823 (w), 791 (w), 740 (w), 703 (m), 699 (m), 690 (m). UV-Vis-NIR (CH<sub>2</sub>Cl<sub>2</sub>): λ<sub>max</sub> = 1106 nm (ε = 7900 L mol<sup>-1</sup> cm<sup>-1</sup>), 816 (18000), 499 (sh, 4300), 386 (7900). Anal. Calcd for C<sub>74</sub>H<sub>66</sub>Cl<sub>2</sub>F<sub>24</sub>N<sub>2</sub>O<sub>2</sub>Ru: C, 54.09; H, 4.05; N, 1.70. Found: C, 54.26; H, 3.62; N, 1.77.

The blue filtrate is evaporated using a rotary evaporator. The blue residue is slurried with approximately 10 mL of acetonitrile and the solid collected by vacuum filtration through a glass frit. Washing with 2 × 10 mL acetonitrile and air-drying for 30 min gives 460 mg (48%) of a mixture of *cis*- and ***trans*-(CF<sub>3</sub>Tio)<sub>2</sub>RuCl<sub>2</sub>** (5:1 ratio of *cis*:*trans* by <sup>1</sup>H NMR). <sup>1</sup>H NMR (*cis* isomer, CD<sub>2</sub>Cl<sub>2</sub>): δ 1.05 (s, 18H, <sup>t</sup>Bu), 1.16 (s, 18H, <sup>t</sup>Bu), 7.05 (d, 2.1 Hz, 2H, iminoxolene 3- or 5-H), 7.49 (dd, 7.7, 1.5 Hz, 2H, Ar 4'- or 6'-H), 7.52 (dd, 8.4, 1.5 Hz, 2H, Ar 4'- or 6'-H), 7.56 (sl br, 4H, Ar 4,4''-H), 7.60 (br, 8H, Ar 2,6,2'',6''-H), 7.70 (t, 7.7 Hz, 2H, Ar 5'-H). <sup>13</sup>C {<sup>1</sup>H} NMR (CD<sub>2</sub>Cl<sub>2</sub>): δ 28.75, 29.19, 29.26, 29.78, 34.52, 34.49, 34.95, 35.53, 113.37, 113.78, 120.69 (broad), 121.04 (broad), 121.18 (broad), 122.82 (q, <sup>1</sup>J<sub>CF</sub> = 273 Hz), 123.32 (q, <sup>1</sup>J<sub>CF</sub> = 273 Hz), 123.55 (q, <sup>1</sup>J<sub>CF</sub> = 273 Hz), 125.37, 127.41, 128.29, 129.01, 129.09 (q, <sup>2</sup>J<sub>CF</sub> = 34 Hz), 129.94

(broad), 130.19 (q,  $^2J_{CF} = 33$  Hz), 130.25, 130.99, 131.15 (q,  $^2J_{CF} = 33$  Hz), 132.44, 132.50, 133.31, 133.92, 135.10, 135.15, 140.33, 141.07, 141.56, 144.34, 145.30, 146.15, 146.23, 152.02, 153.34, 164.10, 169.57, 182.27, 192.94.  $^{19}\text{F}\{^1\text{H}\}$  NMR (*cis* isomer,  $\text{CD}_2\text{Cl}_2$ ):  $\delta$  -62.93 (s, 12F), -63.02 (br s, 12F). IR (evapd film,  $\text{cm}^{-1}$ ): 2967 (m), 2915 (m), 2877 (w), 1797 (w), 1615 (w), 1590 (m), 1521 (m), 1478 (m), 1461 (m), 1397 (w), 1367 (s), 1306 (w), 1281 (s), 1173 (s), 1122 (s), 1096 (s), 1066 (w), 1023 (m), 989 (w), 890 (m), 869 (w), 843 (w), 800 (w), 736 (m), 702 (m), 676 (m), 637 (w). UV-Vis-NIR (*cis* isomer,  $\text{CH}_2\text{Cl}_2$ ):  $\lambda_{\text{max}} = 656$  nm ( $\epsilon = 28000$  L mol $^{-1}$  cm $^{-1}$ ).

**Bis(*N*-(2,6-diisopropylphenyl)-3,5-di-*tert*-butyl-2-benzoiminoxolene)(triphenylphosphine)ruthenium, (Diso) $_2$ Ru(PPh $_3$ ).** *cis*-(Diso) $_2$ RuCl $_2$  (100 mg, 0.107 mmol) and cobaltocene (42 mg, 0.222 mmol, 2.07 equiv) are dissolved in 6 mL THF in the glovebox. The solution is shaken to dissolve the materials and immediately turns pink. It is then added to 61 mg solid triphenylphosphine (0.236 mmol, 2.2 equiv) in a 20-mL glass scintillation vial. The vial is capped and stirred for 2 d at room temperature. After filtration of the reaction mixture through a glass frit, the filtrate is collected, transferred to a round bottom flask, and stripped to dryness on the vacuum line. The green residue is dissolved in a vial with 3 mL  $\text{CH}_2\text{Cl}_2$  and layered with 9 mL of  $\text{CH}_3\text{CN}$ . After 1 d at room temperature, the green crystals are collected on a glass frit by suction filtration, washed with  $2 \times 2$  mL  $\text{CH}_3\text{CN}$ , and air-dried to give 85.2 mg of (Diso) $_2$ Ru(PPh $_3$ ) (71%).  $^1\text{H}$  NMR ( $\text{CD}_2\text{Cl}_2$ ,  $-85$  °C):  $\delta$  -0.08 (d, 6.7 Hz, 3H,  $\text{CH}(\text{CH}_3)_2$ ), 0.09 (d, 6.4 Hz, 3H,  $\text{CH}(\text{CH}_3)_2$ ), 0.17 (d, 6.5 Hz, 3H,  $\text{CH}(\text{CH}_3)_2$ ), 0.39 (d, 6.6 Hz, 3H,  $\text{CH}(\text{CH}_3)_2$ ), 0.56 (d, 6.9 Hz, 3H,  $\text{CH}(\text{CH}_3)_2$ ), 0.70 (d, 6.6 Hz, 3H,  $\text{CH}(\text{CH}_3)_2$ ), 0.83 (d, 6.7 Hz, 3H,  $\text{CH}(\text{CH}_3)_2$ ), 0.89 (s, 9H,  $^t\text{Bu}$ ), 1.00 (s, 9H,  $^t\text{Bu}$ ), 1.02 (s, 9H,  $^t\text{Bu}$ ), 1.15 (s, 9H,  $^t\text{Bu}$ ), 1.46 (sept, 6.6 Hz, 1H,  $\text{CH}(\text{CH}_3)_2$ ), 1.94 (sept, 6.2 Hz, 1H,  $\text{CH}(\text{CH}_3)_2$ ), 2.35 (sept, 6.4 Hz, 1H,

$CH(CH_3)_2$ ), 5.98 (broad, 2H,  $PPh_3$ ), 6.21 (d, 1.8 Hz, 1H, iminoxolene 3- or 5-H), 6.45 (d, 1.4 Hz, 1H, iminoxolene 3- or 5-H), 6.63 (t, 8.7 Hz, 1H, *p*-H  $PPh_3$ ), 6.81 (broad, 2H,  $PPh_3$ ), 6.91-7.40 (m, 14H), 7.51 (t, 7.6 Hz, 2H), 7.62 (m, 1H,  $PPh_3$ ), 8.47 (dd, 13.5 Hz, 7.5 Hz, 1H,  $PCCH$ ). One  $CH(CH_3)$  and one  $CH(CH_3)_2$  signal are not observed, presumably because they are obscured by  $t$ Bu peaks.  $^{31}P\{^1H\}$  NMR ( $CD_2Cl_2$ ):  $\delta$  48.34. IR (nujol mull,  $cm^{-1}$ ): 3165 (w), 1587 (m), 1541 (m), 1317 (m), 1294 (m), 1253 (m), 1229 (m), 1199 (s), 1158 (s), 1103 (w), 1092 (s), 1026 (w), 996 (w), 867 (m), 799 (m), 777 (m), 742 (m), 722 (w), 692 (m). UV-Vis-NIR ( $CH_2Cl_2$ ):  $\lambda_{max}$  = 713 nm ( $\epsilon$  = 13100 L mol $^{-1}$  cm $^{-1}$ ), 436 (7300), 543 (4000). Anal. Calcd for  $C_{70}H_{89}N_2O_2PRu$ : C, 74.90; H, 7.99; N, 2.50. Found: C, 74.04; H, 8.27; N, 2.61.

**Bis(*N*-(2,6-diisopropylphenyl)-3,5-di-*tert*-butyl-1,2-benzoiminoxolene)(triphenylphosphine)osmium, (Diso) $_2$ Os( $PPh_3$ ).** The osmium compound is prepared by the method used for the ruthenium analogue using 100 mg of *cis*-(Diso) $_2$ OsCl $_2$  (0.107 mmol), 40 mg of  $Cp_2Co$  (0.211 mmol, 2.15 equiv), and 58 mg of  $PPh_3$  (0.221 mmol, 2.25 equiv), and yields 79.2 mg of (Diso) $_2$ Os( $PPh_3$ ) (67%).  $^1H$  NMR ( $CD_2Cl_2$ ,  $-78$  °C):  $\delta$  -0.29 (d, 5.7 Hz, 3H,  $CH(CH_3)_2$ ), -0.03 (d, 6.2 Hz, 3H,  $CH(CH_3)_2$ ), 0.17 (d, 6.4 Hz, 3H,  $CH(CH_3)_2$ ), 0.39 (d, 6.5 Hz, 3H,  $CH(CH_3)_2$ ), 0.50 (d, 6.0 Hz, 3H,  $CH(CH_3)_2$ ), 0.73 (d, 6.4 Hz, 3H,  $CH(CH_3)_2$ ), 0.76 (d, 6.2 Hz, 3H,  $CH(CH_3)_2$ ), 0.94 (d, 6.5 Hz, 3H,  $CH(CH_3)_2$ ), 0.98 (s, 9H,  $t$ Bu), 1.05 (s, 18H, 2  $\times$   $t$ Bu), 1.20 (s, 9H,  $t$ Bu), 1.34 (sept, 6.4 Hz, 1H,  $CH(CH_3)_2$ ), 1.46 (sept, 6.4 Hz, 1H,  $CH(CH_3)_2$ ), 2.13 (sept, 6.6 Hz, 1H,  $CH(CH_3)_2$ ), 5.76 (br, 2H,  $PPh_3$ ), 6.06 (d, 1.5 Hz, 1H, iminoxolene 3- or 5-H), 6.16 (d, 1.4 Hz, 1H, iminoxolene 3- or 5-H), 6.19 (br, 1H,  $PPh_3$ ), 6.48 (d, 1.9 Hz, 1H, iminoxolene 3- or 5-H), 6.57 (br, 1H,  $PPh_3$ ), 6.60 (t, 7.8 Hz, 1H,  $PPh_3$ ), 6.82 (d, 7.4 Hz, 1H, Ar 3- or 5-H), 6.90 (d, 2.0 Hz, 1H, iminoxolene 3- or 5-H), 7.07-7.46 (m, 13H), 7.84 (br, 1H,  $PPh_3$ ), 7.93 (dd, 12.3 Hz, 7.8 Hz, 1H,  $PCCH$ ). One  $CH(CH_3)_2$  signal is not observed,

presumably because it is obscured by a <sup>t</sup>Bu peak. <sup>31</sup>P{<sup>1</sup>H} NMR (CD<sub>2</sub>Cl<sub>2</sub>): δ -18.59. IR (nujol mull, cm<sup>-1</sup>): 3058 (w), 1587 (w), 1551 (w), 1316 (m), 1278 (w), 1254 (m), 1232 (w), 1199 (m), 1158 (m), 1092 (w), 866 (w), 800 (m), 770 (w), 744 (m), 692 (m). UV-Vis-NIR (CH<sub>2</sub>Cl<sub>2</sub>): λ<sub>max</sub> = 796 nm (ε = 1400 L mol<sup>-1</sup> cm<sup>-1</sup>), 608 nm (20200), 483 (6900), 414 (8600), 371 (sh, 9800). Anal. Calcd for C<sub>70</sub>H<sub>89</sub>N<sub>2</sub>O<sub>2</sub>OsP: C, 69.39; H, 7.40; N, 2.31. Found: C, 69.08; H, 7.37; N, 2.24.

**Electrochemistry.** Electrochemical measurements were performed in the drybox using a Metrohm Autolab PGSTAT128N potentiostat. A standard three-electrode setup was used, with glassy carbon working and counter electrodes and a silver/silver chloride pseudo-reference electrode. The electrodes were connected to the potentiostat through electrical conduits in the drybox wall. Samples were 1 mM in CH<sub>2</sub>Cl<sub>2</sub> with 100 mM [Bu<sub>4</sub>N]PF<sub>6</sub> as supporting electrolyte. Potentials were referenced to ferrocene/ferrocenium at 0 V,<sup>S5</sup> with the reference potential established by spiking the solutions of *cis*- and *trans*-(Diso)<sub>2</sub>RuCl<sub>2</sub> with a small amount of ferrocene (*E*<sup>o</sup> = 0 V) and the solutions of *trans*-(CF<sub>3</sub>Tio)<sub>2</sub>RuCl<sub>2</sub>, (Diso)<sub>2</sub>Ru(PPh<sub>3</sub>), and (Diso)<sub>2</sub>Os(PPh<sub>3</sub>) with a small amount of decamethylferrocene (*E*<sup>o</sup> = -0.565 V).<sup>S6</sup> Cyclic voltammograms were recorded with a scan rate of 60 mV s<sup>-1</sup>.

**Variable-temperature NMR spectroscopy.** Variable-temperature <sup>1</sup>H NMR spectra of (Diso)<sub>2</sub>M(PPh<sub>3</sub>) (M = Ru, Os) were measured on CD<sub>2</sub>Cl<sub>2</sub> solutions on a Bruker Avance DPX-400 NMR spectrometer, with temperatures calibrated using the peak separation in CH<sub>3</sub>OH.<sup>S7</sup> Variable-temperature <sup>1</sup>H NMR spectra of *trans*-(Diso)<sub>2</sub>MCl<sub>2</sub> (M = Ru, Os) were measured on solutions in 20% CDFCl<sub>2</sub>/80% CF<sub>2</sub>Cl<sub>2</sub> in flame-sealed glass NMR tubes. Temperatures were calibrated down to 178 K using the peak separation in CH<sub>3</sub>OH as described above. To calibrate temperatures below 178 K, the peak separation between the <sup>13</sup>C signals in (Me<sub>3</sub>Si)<sub>3</sub>CH in the

20% CDFCl<sub>2</sub>/80% CF<sub>2</sub>Cl<sub>2</sub> solvent system was measured in the range 295-178 K and was found to show a linear dependence on temperature, as had been previously observed in a variety of solvents down to 134 K.<sup>S8</sup> The linear calibration curve was then extrapolated below 178 K and the measured  $\Delta\delta$  values used to relate the nominal spectrometer temperature to the actual temperature.

Lineshapes of *trans*-(Diso)<sub>2</sub>RuCl<sub>2</sub>, (Diso)<sub>2</sub>Ru(PPh<sub>3</sub>), and (Diso)<sub>2</sub>Os(PPh<sub>3</sub>) were simulated using iNMR. For *trans*-(Diso)<sub>2</sub>OsCl<sub>2</sub>, the iminoxolene proton resonances at 129 and 137 K were simulated in iNMR, and the isopropyl methine resonances at 120, 146, and 164 K were simulated using the dynamic NMR simulation routine in Topspin. In the spectra of (Diso)<sub>2</sub>Ru(PPh<sub>3</sub>) and (Diso)<sub>2</sub>Os(PPh<sub>3</sub>), the *tert*-butyl protons were simulated. For *trans*-(Diso)<sub>2</sub>RuCl<sub>2</sub>, the chemical shifts of the exchanging downfield iminoxolene protons were determined by lineshape simulation at 100 K, and that difference in chemical shift was assumed to be independent of temperature in simulations of spectra at higher temperatures. For all other spectra, at temperatures above the coalescence point, chemical shifts of exchanging signals were estimated by linear extrapolation of the shifts observed below the coalescence point, and the extrapolated difference in chemical shift was treated as fixed in the simulation.

**Calculations.** Geometry optimizations and orbital calculations used the hybrid B3LYP method, using the Gaussian16 suite of programs.<sup>S9</sup> An SDD basis set was used for ruthenium and osmium and a 6-31G\* basis set for all other atoms. Ligands were truncated by using 1,2-C<sub>6</sub>H<sub>4</sub>(NH)O (ap) as the iminoxolene, and PMe<sub>3</sub> was used in place of PPh<sub>3</sub>. Optimized geometries were confirmed to be minima by frequency analysis. For *trans*-(ap)<sub>2</sub>MCl<sub>2</sub>, the minimum-energy structures had C<sub>s</sub> symmetry. Structures constrained to adopt C<sub>2</sub> symmetry were at higher energy, and were found to be transition states (one imaginary frequency) leading to the interconversion of the two equivalent C<sub>s</sub> structures. Constraining *trans*-(ap)<sub>2</sub>MCl<sub>2</sub> to C<sub>i</sub> or

$C_{2h}$  symmetry led to essentially identical optimized structures, at higher energy than the  $C_2$ -symmetric structures. Calculations on  $(ap)_2Os(PMe_3)$  have been previously reported.<sup>S10</sup> Constrained calculations on  $(ap)_2M(PMe_3)$  required the  $(ap)_2MP$  core to adhere to  $C_2$  symmetry, but the methyl groups on phosphorus were allowed to refine freely. Plots of calculated Kohn-Sham orbitals were generated using the program GaussView (v. 6.0.16) with an isovalue of 0.04.

## II. X-ray crystallography

**Crystallographic details.** Crystals of *cis*-(Diso)<sub>2</sub>RuCl<sub>2</sub> and *cis*-(Diso)<sub>2</sub>OsCl<sub>2</sub> were grown by vapor diffusion of acetonitrile into benzene solutions of the compounds, while crystals of *trans*-(Diso)<sub>2</sub>RuCl<sub>2</sub> deposited from the crude reaction mixture dissolved in hexane. Crystals of *trans*-(<sup>CF<sub>3</sub></sup>Tio)<sub>2</sub>RuCl<sub>2</sub>, (Diso)<sub>2</sub>Os(PPh<sub>3</sub>)•2 CH<sub>2</sub>Cl<sub>2</sub>, and (Diso)<sub>2</sub>Ru(PPh<sub>3</sub>)•2 CH<sub>2</sub>Cl<sub>2</sub> were grown by liquid diffusion of acetonitrile into dichloromethane solutions of the complexes. Crystals of CF<sub>3</sub>Tio deposited from a methanol solution of the compound at room temperature. Crystals were placed in Paratone oil before being transferred to the cold N<sub>2</sub> stream of a Bruker Apex II CCD diffractometer in a nylon loop. Data were reduced, correcting for absorption, using the program SADABS. The structures were solved using Patterson methods, with remaining nonhydrogen atoms found on difference Fourier maps, and all nonhydrogen atoms were refined anisotropically. Hydrogen atoms were found on difference Fourier maps and refined isotropically, except for those in *trans*-(Diso)<sub>2</sub>RuCl<sub>2</sub> and those on the lattice solvent and disordered *tert*-butyl group in (Diso)<sub>2</sub>Ru(PPh<sub>3</sub>)•2 CH<sub>2</sub>Cl<sub>2</sub>, which were placed in calculated positions.

In *trans*-(Diso)<sub>2</sub>RuCl<sub>2</sub>, iminoxolene ring 2 is disordered in two different orientations. Atoms C23, C24, C25, and the *tert*-butyl group centered at C28 are in different positions in the two components. Corresponding atoms in the two components were given identical thermal parameters, and the occupancy of the two components was allowed to vary, refining to 55.4(4)% occupancy of the major component. In (Diso)<sub>2</sub>Ru(PPh<sub>3</sub>)•2 CH<sub>2</sub>Cl<sub>2</sub>, one lattice CH<sub>2</sub>Cl<sub>2</sub> was refined at full occupancy, while another near the inversion center was refined in three positions constrained to sum to a single CH<sub>2</sub>Cl<sub>2</sub>. One *tert*-butyl group (the one centered on C18) in this structure was modeled as occupying two orientations. In (Diso)<sub>2</sub>Os(PPh<sub>3</sub>)•2 CH<sub>2</sub>Cl<sub>2</sub>, one lattice



CH<sub>2</sub>Cl<sub>2</sub> and was refined at full occupancy, while solvent in a channel near the inversion center was too disordered to model. The diffuse electron density in this channel was treated with the program SQUEEZE.<sup>S11</sup> The volume of solvent in the asymmetric unit was 212 Å<sup>3</sup> and the electron count was 46, corresponding to one molecule of CH<sub>2</sub>Cl<sub>2</sub> per asymmetric unit. One *tert*-butyl group (the one centered on C18) in this structure was modeled as occupying two orientations. In CF<sub>3</sub>Tio, the oxygen atom (O and O1) was modeled in two different positions on the iminoquinone ring, corresponding to the (*Z*) and (*E*) isomers, in a 10:1 ratio. One of the CF<sub>3</sub> groups (bonded to C471) also showed slight disorder, with the minor component refined with fixed C–F distances and with thermal parameters pinned to those in the major component; the refined population of the minor component was 8.0(3)%. In *trans*-(CF<sub>3</sub>Tio)<sub>2</sub>RuCl<sub>2</sub>, four of the trifluoromethyl groups (the ones centered on C318, C417, C418, C427) in the structure showed rotational disorder and were modeled as occupying two orientations. Calculations used SHELXTL (Bruker AXS),<sup>S12</sup> with scattering factors and anomalous dispersion terms taken from the literature.<sup>S13</sup> Further details may be found in Tables S1-S4, with summaries of bond distances and angles in Tables S5-S7.

**Table S1.** Crystal data for *cis*-(Diso)<sub>2</sub>RuCl<sub>2</sub> and *cis*-(Diso)<sub>2</sub>OsCl<sub>2</sub>.

|                                                               | <i>cis</i> -(Diso) <sub>2</sub> RuCl <sub>2</sub>                                | <i>cis</i> -(Diso) <sub>2</sub> OsCl <sub>2</sub>                                |
|---------------------------------------------------------------|----------------------------------------------------------------------------------|----------------------------------------------------------------------------------|
| Molecular formula                                             | C <sub>52</sub> H <sub>74</sub> Cl <sub>2</sub> N <sub>2</sub> O <sub>2</sub> Ru | C <sub>52</sub> H <sub>74</sub> Cl <sub>2</sub> N <sub>2</sub> O <sub>2</sub> Os |
| Formula weight                                                | 931.10                                                                           | 1020.23                                                                          |
| <i>T</i> /K                                                   | 120(2)                                                                           | 120(2)                                                                           |
| Crystal system                                                | Monoclinic                                                                       | Monoclinic                                                                       |
| Space group                                                   | <i>P</i> 2 <sub>1</sub> / <i>c</i>                                               | <i>P</i> 2 <sub>1</sub> / <i>c</i>                                               |
| $\lambda/\text{\AA}$                                          | 0.71073 (Mo K $\alpha$ )                                                         | 0.71073 (Mo K $\alpha$ )                                                         |
| Total data collected                                          | 67806                                                                            | 514155                                                                           |
| No. of indep. reflns.                                         | 12376                                                                            | 46238                                                                            |
| <i>R</i> <sub>int</sub>                                       | 0.0521                                                                           | 0.0409                                                                           |
| Obsd refls [ <i>I</i> > 2 $\sigma$ ( <i>I</i> )]              | 10496                                                                            | 39851                                                                            |
| <i>a</i> / $\text{\AA}$                                       | 18.8219(8)                                                                       | 18.7953(9)                                                                       |
| <i>b</i> / $\text{\AA}$                                       | 12.0482(5)                                                                       | 12.0376(5)                                                                       |
| <i>c</i> / $\text{\AA}$                                       | 22.0868(10)                                                                      | 22.1480(10)                                                                      |
| $\alpha$ /°                                                   | 90                                                                               | 90                                                                               |
| $\beta$ /°                                                    | 92.6706(17)                                                                      | 92.0871(17)                                                                      |
| $\gamma$ /°                                                   | 90                                                                               | 90                                                                               |
| <i>V</i> / $\text{\AA}^3$                                     | 5003.2(4)                                                                        | 5007.7(4)                                                                        |
| <i>Z</i>                                                      | 4                                                                                | 4                                                                                |
| $\mu/\text{mm}^{-1}$                                          | 0.459                                                                            | 2.692                                                                            |
| Crystal size/mm                                               | 0.23 × 0.19 × 0.17                                                               | 0.29 × 0.28 × 0.27                                                               |
| No. refined parameters                                        | 828                                                                              | 828                                                                              |
| <i>R</i> 1, <i>wR</i> 2 [ <i>I</i> > 2 $\sigma$ ( <i>I</i> )] | 0.0317, 0.0634                                                                   | 0.0256, 0.0483                                                                   |
| <i>R</i> 1, <i>wR</i> 2 [all data]                            | 0.0426, 0.0686                                                                   | 0.0354, 0.0507                                                                   |
| Goodness of fit                                               | 1.092                                                                            | 1.198                                                                            |

**Table S2.** Crystal data for *trans*-(Diso)<sub>2</sub>RuCl<sub>2</sub> and *trans*-(Diso)<sub>2</sub>OsCl<sub>2</sub>.

|                                                               | <i>trans</i> -(Diso) <sub>2</sub> RuCl <sub>2</sub>                              | <i>trans</i> -(Diso) <sub>2</sub> OsCl <sub>2</sub>                              |
|---------------------------------------------------------------|----------------------------------------------------------------------------------|----------------------------------------------------------------------------------|
| Molecular formula                                             | C <sub>52</sub> H <sub>74</sub> Cl <sub>2</sub> N <sub>2</sub> O <sub>2</sub> Ru | C <sub>52</sub> H <sub>74</sub> Cl <sub>2</sub> N <sub>2</sub> O <sub>2</sub> Os |
| Formula weight                                                | 931.10                                                                           | 1020.23                                                                          |
| <i>T</i> /K                                                   | 120(2)                                                                           | 120(2)                                                                           |
| Crystal system                                                | Monoclinic                                                                       | Monoclinic                                                                       |
| Space group                                                   | <i>P</i> 2 <sub>1</sub> / <i>c</i>                                               | <i>P</i> 2 <sub>1</sub> / <i>c</i>                                               |
| $\lambda/\text{\AA}$                                          | 0.71073 (Mo K $\alpha$ )                                                         | 0.71073 (Mo K $\alpha$ )                                                         |
| Total data collected                                          | 74920                                                                            | 110676                                                                           |
| No. of indep. reflns.                                         | 12967                                                                            | 11561                                                                            |
| <i>R</i> <sub>int</sub>                                       | 0.0606                                                                           | 0.0441                                                                           |
| Obsd refls [ <i>I</i> > 2 $\sigma$ ( <i>I</i> )]              | 10562                                                                            | 10532                                                                            |
| <i>a</i> / $\text{\AA}$                                       | 17.1927(11)                                                                      | 17.3519(19)                                                                      |
| <i>b</i> / $\text{\AA}$                                       | 22.2351(14)                                                                      | 22.294(3)                                                                        |
| <i>c</i> / $\text{\AA}$                                       | 13.9010(9)                                                                       | 13.7682(15)                                                                      |
| $\alpha/^\circ$                                               | 90                                                                               | 90                                                                               |
| $\beta/^\circ$                                                | 100.305(2)                                                                       | 100.3577(17)                                                                     |
| $\gamma/^\circ$                                               | 90                                                                               | 90                                                                               |
| <i>V</i> / $\text{\AA}^3$                                     | 5228.4(6)                                                                        | 5239.4(10)                                                                       |
| <i>Z</i>                                                      | 4                                                                                | 4                                                                                |
| $\mu/\text{mm}^{-1}$                                          | 0.439                                                                            | 2.573                                                                            |
| Crystal size/mm                                               | 0.19 × 0.12 × 0.10                                                               | 0.21 × 0.15 × 0.10                                                               |
| No. refined parameters                                        | 554                                                                              | 596                                                                              |
| <i>R</i> 1, <i>wR</i> 2 [ <i>I</i> > 2 $\sigma$ ( <i>I</i> )] | 0.0717, 0.1315                                                                   | 0.0625, 0.1270                                                                   |
| <i>R</i> 1, <i>wR</i> 2 [all data]                            | 0.0900, 0.1389                                                                   | 0.0694, 0.1297                                                                   |
| Goodness of fit                                               | 1.210                                                                            | 1.302                                                                            |

**Table S3.** Crystal data for CF<sub>3</sub>Tio and *trans*-(CF<sub>3</sub>Tio)<sub>2</sub>RuCl<sub>2</sub>.

|                                                               | CF <sub>3</sub> Tio                                | <i>trans</i> -<br>(CF <sub>3</sub> Tio) <sub>2</sub> RuCl <sub>2</sub>                           |
|---------------------------------------------------------------|----------------------------------------------------|--------------------------------------------------------------------------------------------------|
| Molecular formula                                             | C <sub>36</sub> H <sub>29</sub> F <sub>12</sub> NO | C <sub>72</sub> H <sub>58</sub> Cl <sub>2</sub> F <sub>24</sub> N <sub>2</sub> O <sub>2</sub> Ru |
| Formula weight                                                | 719.60                                             | 1611.17                                                                                          |
| <i>T</i> /K                                                   | 120(2)                                             | 200(2)                                                                                           |
| Crystal system                                                | Orthorhombic                                       | Triclinic                                                                                        |
| Space group                                                   | <i>Pbca</i>                                        | <i>P</i> $\bar{1}$                                                                               |
| $\lambda/\text{\AA}$                                          | 0.71073 (Mo K $\alpha$ )                           | 0.71073 (Mo K $\alpha$ )                                                                         |
| Total data collected                                          | 146007                                             | 58028                                                                                            |
| No. of indep. reflns.                                         | 8290                                               | 19265                                                                                            |
| <i>R</i> <sub>int</sub>                                       | 0.0360                                             | 0.0302                                                                                           |
| Obsd refls [ <i>I</i> > 2 $\sigma$ ( <i>I</i> )]              | 7145                                               | 15573                                                                                            |
| <i>a</i> /\AA                                                 | 20.2437(13)                                        | 13.2962(13)                                                                                      |
| <i>b</i> /\AA                                                 | 9.7698(6)                                          | 13.5768(14)                                                                                      |
| <i>c</i> /\AA                                                 | 33.781(3)                                          | 21.676(2)                                                                                        |
| $\alpha$ /°                                                   | 90                                                 | 76.1839(15)                                                                                      |
| $\beta$ /°                                                    | 90                                                 | 82.2455(15)                                                                                      |
| $\gamma$ /°                                                   | 90                                                 | 68.8954(14)                                                                                      |
| <i>V</i> /\AA <sup>3</sup>                                    | 6681.0(8)                                          | 3539.7(6)                                                                                        |
| <i>Z</i>                                                      | 8                                                  | 2                                                                                                |
| $\mu/\text{mm}^{-1}$                                          | 0.132                                              | 0.407                                                                                            |
| Crystal size/mm                                               | 0.39 × 0.33 × 0.16                                 | 0.19 × 0.16 × 0.09                                                                               |
| No. refined parameters                                        | 581                                                | 1200                                                                                             |
| <i>R</i> 1, <i>wR</i> 2 [ <i>I</i> > 2 $\sigma$ ( <i>I</i> )] | 0.0471, 0.1098                                     | 0.0391, 0.0870                                                                                   |
| <i>R</i> 1, <i>wR</i> 2 [all data]                            | 0.0561, 0.1156                                     | 0.0556, 0.0943                                                                                   |
| Goodness of fit                                               | 1.070                                              | 1.019                                                                                            |

**Table S4.** Crystal data for (Diso)<sub>2</sub>Ru(PPh<sub>3</sub>) • 2 CH<sub>2</sub>Cl<sub>2</sub> and (Diso)<sub>2</sub>Os(PPh<sub>3</sub>) • 2 CH<sub>2</sub>Cl<sub>2</sub>

|                                                               | (Diso) <sub>2</sub> Ru(PPh <sub>3</sub> ) • 2 CH <sub>2</sub> Cl <sub>2</sub>     | (Diso) <sub>2</sub> Os(PPh <sub>3</sub> ) • 2 CH <sub>2</sub> Cl <sub>2</sub>     |
|---------------------------------------------------------------|-----------------------------------------------------------------------------------|-----------------------------------------------------------------------------------|
| Molecular formula                                             | C <sub>72</sub> H <sub>93</sub> Cl <sub>4</sub> N <sub>2</sub> O <sub>2</sub> PRu | C <sub>72</sub> H <sub>93</sub> Cl <sub>4</sub> N <sub>2</sub> O <sub>2</sub> OsP |
| Formula weight                                                | 1292.32                                                                           | 1381.45                                                                           |
| <i>T</i> /K                                                   | 120(2)                                                                            | 120(2)                                                                            |
| Crystal system                                                | Triclinic                                                                         | Triclinic                                                                         |
| Space group                                                   | <i>P</i> $\bar{1}$                                                                | <i>P</i> $\bar{1}$                                                                |
| $\lambda$ /Å                                                  | 0.71073 (Mo K $\alpha$ )                                                          | 0.71073 (Mo K $\alpha$ )                                                          |
| Total data collected                                          | 106405                                                                            | 53324                                                                             |
| No. of indep. reflns.                                         | 16961                                                                             | 17058                                                                             |
| <i>R</i> <sub>int</sub>                                       | 0.0311                                                                            | 0.0227                                                                            |
| Obsd refls [ <i>I</i> > 2 $\sigma$ ( <i>I</i> )]              | 15197                                                                             | 15759                                                                             |
| <i>a</i> /Å                                                   | 11.6411(12)                                                                       | 11.6271(13)                                                                       |
| <i>b</i> /Å                                                   | 15.7348(16)                                                                       | 15.7458(18)                                                                       |
| <i>c</i> /Å                                                   | 20.953(2)                                                                         | 20.984(2)                                                                         |
| $\alpha$ /°                                                   | 101.7895(16)                                                                      | 101.7330(16)                                                                      |
| $\beta$ /°                                                    | 101.1562(17)                                                                      | 101.0916(16)                                                                      |
| $\gamma$ /°                                                   | 107.3093(16)                                                                      | 107.4927(16)                                                                      |
| <i>V</i> /Å <sup>3</sup>                                      | 3451.5(6)                                                                         | 3452.8(7)                                                                         |
| <i>Z</i>                                                      | 2                                                                                 | 2                                                                                 |
| $\mu$ /mm <sup>-1</sup>                                       | 0.449                                                                             | 2.069                                                                             |
| Crystal size/mm                                               | 0.27 × 0.21 × 0.12                                                                | 0.36 × 0.24 × 0.11                                                                |
| No. refined parameters                                        | 1090                                                                              | 1042                                                                              |
| <i>R</i> 1, <i>wR</i> 2 [ <i>I</i> > 2 $\sigma$ ( <i>I</i> )] | 0.0348, 0.0931                                                                    | 0.0239, 0.0613                                                                    |
| <i>R</i> 1, <i>wR</i> 2 [all data]                            | 0.0407, 0.0968                                                                    | 0.0273, 0.0626                                                                    |
| Goodness of fit                                               | 1.062                                                                             | 1.059                                                                             |

**Table S5.** Selected bond distances (Å), angles (°), and metrical oxidation states (MOS)<sup>S14</sup> for *cis*-(Diso)<sub>2</sub>RuCl<sub>2</sub> and *cis*-(Diso)<sub>2</sub>OsCl<sub>2</sub>. Values given in Roman type are from the crystal structures. Values given in italics are from DFT calculations on *cis*-(ap)<sub>2</sub>MCl<sub>2</sub> (ap = C<sub>6</sub>H<sub>4</sub>(NH)O), which are C<sub>2</sub>-symmetric.

| Parameter   | <i>cis</i> -(Diso) <sub>2</sub> <b>Ru</b> Cl <sub>2</sub> |                 | <i>cis</i> -(Diso) <sub>2</sub> <b>Os</b> Cl <sub>2</sub> |                 |
|-------------|-----------------------------------------------------------|-----------------|-----------------------------------------------------------|-----------------|
|             | X-ray                                                     | <i>DFT</i>      | X-ray                                                     | <i>DFT</i>      |
| M–O1        | 2.0272(12)                                                | <i>2.0742</i>   | 2.0047(6)                                                 | <i>2.0550</i>   |
| M–O2        | 2.0290(12)                                                |                 | 2.0109(6)                                                 |                 |
| M–N1        | 2.0179(14)                                                | <i>1.9791</i>   | 2.0120(7)                                                 | <i>1.9803</i>   |
| M–N2        | 2.0156(14)                                                |                 | 2.0068(6)                                                 |                 |
| M–Cl1       | 2.3236(4)                                                 | <i>2.3514</i>   | 2.3168(2)                                                 | <i>2.3612</i>   |
| M–Cl2       | 2.3234(4)                                                 |                 | 2.3184(2)                                                 |                 |
| C11–O1      | 1.287(2)                                                  | <i>1.2814</i>   | 1.3048(10)                                                | <i>1.3004</i>   |
| C12–N1      | 1.342(2)                                                  | <i>1.3271</i>   | 1.3558(10)                                                | <i>1.3448</i>   |
| C11–C12     | 1.445(2)                                                  | <i>1.4587</i>   | 1.4298(11)                                                | <i>1.4407</i>   |
| C12–C13     | 1.421(2)                                                  | <i>1.4286</i>   | 1.4142(11)                                                | <i>1.4192</i>   |
| C13–C14     | 1.365(3)                                                  | <i>1.3691</i>   | 1.3725(12)                                                | <i>1.3761</i>   |
| C14–C15     | 1.441(3)                                                  | <i>1.4346</i>   | 1.4285(13)                                                | <i>1.4252</i>   |
| C15–C16     | 1.370(2)                                                  | <i>1.3727</i>   | 1.3818(12)                                                | <i>1.3793</i>   |
| C11–C16     | 1.437(2)                                                  | <i>1.4252</i>   | 1.4220(11)                                                | <i>1.4151</i>   |
| C21–O2      | 1.283(2)                                                  | <i>1.2814</i>   | 1.3057(10)                                                | <i>1.3004</i>   |
| C22–N2      | 1.339(2)                                                  | <i>1.3271</i>   | 1.3554(10)                                                | <i>1.3448</i>   |
| C21–C22     | 1.446(2)                                                  | <i>1.4587</i>   | 1.4283(11)                                                | <i>1.4407</i>   |
| C22–C23     | 1.424(2)                                                  | <i>1.4286</i>   | 1.4125(11)                                                | <i>1.4192</i>   |
| C23–C24     | 1.363(2)                                                  | <i>1.3691</i>   | 1.3712(12)                                                | <i>1.3761</i>   |
| C24–C25     | 1.437(3)                                                  | <i>1.4346</i>   | 1.4250(13)                                                | <i>1.4252</i>   |
| C25–C26     | 1.370(3)                                                  | <i>1.3727</i>   | 1.3842(12)                                                | <i>1.3793</i>   |
| C21–C26     | 1.440(2)                                                  | <i>1.4252</i>   | 1.4222(11)                                                | <i>1.4151</i>   |
| Cl1–M–Cl2   | 91.449(17)                                                | <i>91.27</i>    | 91.073(9)                                                 | <i>89.39</i>    |
| O1–M–N1     | 78.04(5)                                                  | <i>77.20</i>    | 77.84(3)                                                  | <i>76.73</i>    |
| O2–M–N2     | 78.15(5)                                                  |                 | 78.18(3)                                                  |                 |
| O1–M–N2     | 93.51(5)                                                  | <i>96.77</i>    | 93.04(3)                                                  | <i>93.03</i>    |
| O2–M–N1     | 93.58(5)                                                  |                 | 93.39(3)                                                  |                 |
| N1–M–N2     | 168.76(6)                                                 | <i>171.03</i>   | 168.09(3)                                                 | <i>164.03</i>   |
| O1–M–O2     | 84.99(5)                                                  | <i>97.09</i>    | 85.96(3)                                                  | <i>101.01</i>   |
| MOS, Ring 1 | –0.80(4)                                                  | <i>–0.70(6)</i> | –1.10(4)                                                  | <i>–1.01(5)</i> |
| MOS, Ring 2 | –0.76(5)                                                  |                 | –1.12(4)                                                  |                 |

**Table S6.** Selected bond distances (Å), angles (°), and metrical oxidation states (MOS)<sup>S14</sup> for *trans*-(iminoxolene)<sub>2</sub>RuCl<sub>2</sub>. Values given in Roman type are from the crystal structures. Values given in italics are from DFT calculations on *trans*-(ap)<sub>2</sub>RuCl<sub>2</sub> (ap = C<sub>6</sub>H<sub>4</sub>(NH)O). Values in *red* are from calculations on compounds constrained to have C<sub>2</sub> symmetry and those in *blue* are constrained to have C<sub>2h</sub> (or C<sub>i</sub>) symmetry.

| Parameter   | <i>trans</i> -<br>(Diso) <sub>2</sub> RuCl <sub>2</sub><br>X-ray | <i>trans</i> -<br>(CF <sub>3</sub> Tio) <sub>2</sub> RuCl <sub>2</sub> ,<br>X-ray | <i>trans</i> -<br>(ap) <sub>2</sub> RuCl <sub>2</sub><br>DFT<br>(minimum-<br>energy, C <sub>s</sub> ) | <i>trans</i> -<br>(ap) <sub>2</sub> RuCl <sub>2</sub><br>DFT (C <sub>2</sub> ) | <i>trans</i> -<br>(ap) <sub>2</sub> RuCl <sub>2</sub><br>DFT (C <sub>2h</sub> ) |
|-------------|------------------------------------------------------------------|-----------------------------------------------------------------------------------|-------------------------------------------------------------------------------------------------------|--------------------------------------------------------------------------------|---------------------------------------------------------------------------------|
| Ru–O1       | 2.079(2)                                                         | 2.0545(13)                                                                        | 2.1171                                                                                                | 2.0660                                                                         | 2.0851                                                                          |
| Ru–O2       | 1.966(3)                                                         | 1.9548(12)                                                                        | 1.9903                                                                                                |                                                                                |                                                                                 |
| Ru–N1       | 1.949(3)                                                         | 1.9671(14)                                                                        | 1.9327                                                                                                | 2.0016                                                                         | 2.0063                                                                          |
| Ru–N2       | 2.064(4)                                                         | 2.1069(14)                                                                        | 2.0994                                                                                                |                                                                                |                                                                                 |
| Ru–Cl1      | 2.3346(10)                                                       | 2.3082(5)                                                                         | 2.3610                                                                                                | 2.4089                                                                         | 2.4109                                                                          |
| Ru–Cl2      | 2.3347(10)                                                       | 2.3207(5)                                                                         |                                                                                                       | 2.4104                                                                         |                                                                                 |
| C11–O1      | 1.279(4)                                                         | 1.273(2)                                                                          | 1.2780                                                                                                | 1.2703                                                                         | 1.2649                                                                          |
| C12–N1      | 1.339(4)                                                         | 1.339(2)                                                                          | 1.3342                                                                                                | 1.3167                                                                         | 1.3137                                                                          |
| C11–C12     | 1.449(5)                                                         | 1.457(2)                                                                          | 1.4594                                                                                                | 1.4761                                                                         | 1.4802                                                                          |
| C12–C13     | 1.408(5)                                                         | 1.418(2)                                                                          | 1.4259                                                                                                | 1.4345                                                                         | 1.4362                                                                          |
| C13–C14     | 1.351(5)                                                         | 1.361(3)                                                                          | 1.3700                                                                                                | 1.3644                                                                         | 1.3632                                                                          |
| C14–C15     | 1.442(5)                                                         | 1.440(3)                                                                          | 1.4331                                                                                                | 1.4419                                                                         | 1.4442                                                                          |
| C15–C16     | 1.368(5)                                                         | 1.364(3)                                                                          | 1.3730                                                                                                | 1.3673                                                                         | 1.3659                                                                          |
| C11–C16     | 1.439(4)                                                         | 1.442(2)                                                                          | 1.4275                                                                                                | 1.4318                                                                         | 1.4346                                                                          |
| C21–O2      | 1.286(5)                                                         | 1.292(2)                                                                          | 1.2829                                                                                                | 1.2703                                                                         | 1.2649                                                                          |
| C22–N2      | 1.325(5)                                                         | 1.321(2)                                                                          | 1.3111                                                                                                | 1.3167                                                                         | 1.3137                                                                          |
| C21–C22     | <i>a</i>                                                         | 1.457(2)                                                                          | 1.4690                                                                                                | 1.4761                                                                         | 1.4802                                                                          |
| C22–C23     | <i>a</i>                                                         | 1.432(2)                                                                          | 1.4375                                                                                                | 1.4345                                                                         | 1.4362                                                                          |
| C23–C24     | <i>a</i>                                                         | 1.361(3)                                                                          | 1.3654                                                                                                | 1.3644                                                                         | 1.3632                                                                          |
| C24–C25     | <i>a</i>                                                         | 1.446(3)                                                                          | 1.4393                                                                                                | 1.4419                                                                         | 1.4442                                                                          |
| C25–C26     | <i>a</i>                                                         | 1.359(3)                                                                          | 1.3693                                                                                                | 1.3673                                                                         | 1.3659                                                                          |
| C21–C26     | <i>a</i>                                                         | 1.436(2)                                                                          | 1.4256                                                                                                | 1.4318                                                                         | 1.4346                                                                          |
| Cl1–Ru–Cl2  | 165.43(4)                                                        | 168.707(19)                                                                       | 161.26                                                                                                | 180                                                                            | 180                                                                             |
| O1–Ru–N1    | 78.57(11)                                                        | 79.15(5)                                                                          | 78.35                                                                                                 |                                                                                |                                                                                 |
| O2–Ru–N2    | 78.16(14)                                                        | 78.54(5)                                                                          | 77.73                                                                                                 |                                                                                |                                                                                 |
| O1–Ru–N2    | 109.01(12)                                                       | 104.55(5)                                                                         | 107.87                                                                                                |                                                                                |                                                                                 |
| O2–Ru–N1    | 94.76(13)                                                        | 97.93(6)                                                                          | 96.05                                                                                                 |                                                                                |                                                                                 |
| MOS, Ring 1 | –0.72(7)                                                         | –0.66(5)                                                                          | –0.72(5)                                                                                              | –0.49(6)                                                                       | –0.42(6)                                                                        |
| MOS, Ring 2 | <i>a</i>                                                         | –0.64(8)                                                                          | –0.57(9)                                                                                              |                                                                                |                                                                                 |

<sup>a</sup>Ring 2 is disordered in the X-ray structure of *trans*-(Diso)<sub>2</sub>RuCl<sub>2</sub>, so the C–C distances are not measured reliably.

**Table S7.** Selected bond distances (Å), angles (°), and metrical oxidation states (MOS)<sup>S14</sup> for *trans*-(iminoxolene)<sub>2</sub>OsCl<sub>2</sub>. Values given in Roman type are from the crystal structures. Values given in italics are from DFT calculations on *trans*-(ap)<sub>2</sub>OsCl<sub>2</sub> (ap = C<sub>6</sub>H<sub>4</sub>(NH)O). Values in *red* are from calculations on compounds constrained to have C<sub>2</sub> symmetry and those in *blue* are constrained to have C<sub>2h</sub> (or C<sub>i</sub>) symmetry.

| Parameter   | <i>trans</i> -<br>(Diso) <sub>2</sub> OsCl <sub>2</sub><br>X-ray | <i>trans</i> -(ap) <sub>2</sub> OsCl <sub>2</sub><br>DFT (minimum-<br>energy, C <sub>s</sub> ) | <i>trans</i> -(ap) <sub>2</sub> OsCl <sub>2</sub><br>DFT (C <sub>2</sub> ) | <i>trans</i> -(ap) <sub>2</sub> OsCl <sub>2</sub><br>DFT (C <sub>2h</sub> ) |
|-------------|------------------------------------------------------------------|------------------------------------------------------------------------------------------------|----------------------------------------------------------------------------|-----------------------------------------------------------------------------|
| Os–O1       | 2.040(4)                                                         | <i>2.1185</i>                                                                                  | <i>2.0513</i>                                                              | <i>1.9922</i>                                                               |
| Os–O2       | 1.955(4)                                                         | <i>1.9872</i>                                                                                  |                                                                            |                                                                             |
| Os–N1       | 1.949(5)                                                         | <i>1.9435</i>                                                                                  | <i>2.0067</i>                                                              | <i>1.9880</i>                                                               |
| Os–N2       | 2.103(6)                                                         | <i>2.1003</i>                                                                                  |                                                                            |                                                                             |
| Os–Cl1      | 2.3027(16)                                                       | <i>2.3559</i>                                                                                  | <i>2.4209</i>                                                              | <i>2.3666</i>                                                               |
| Os–Cl2      | 2.3315(18)                                                       |                                                                                                | <i>2.4149</i>                                                              |                                                                             |
| C11–O1      | 1.298(7)                                                         | <i>1.2937</i>                                                                                  | <i>1.2870</i>                                                              | <i>1.3330</i>                                                               |
| C12–N1      | 1.355(8)                                                         | <i>1.3497</i>                                                                                  | <i>1.3303</i>                                                              | <i>1.3667</i>                                                               |
| C11–C12     | 1.428(9)                                                         | <i>1.4460</i>                                                                                  | <i>1.4632</i>                                                              | <i>1.4303</i>                                                               |
| C12–C13     | 1.400(9)                                                         | <i>1.4183</i>                                                                                  | <i>1.4273</i>                                                              | <i>1.4030</i>                                                               |
| C13–C14     | 1.362(10)                                                        | <i>1.3757</i>                                                                                  | <i>1.3693</i>                                                              | <i>1.3954</i>                                                               |
| C14–C15     | 1.431(10)                                                        | <i>1.4250</i>                                                                                  | <i>1.4345</i>                                                              | <i>1.4042</i>                                                               |
| C15–C16     | 1.372(9)                                                         | <i>1.3794</i>                                                                                  | <i>1.3723</i>                                                              | <i>1.3968</i>                                                               |
| C11–C16     | 1.430(8)                                                         | <i>1.4186</i>                                                                                  | <i>1.4228</i>                                                              | <i>1.3976</i>                                                               |
| C21–O2      | <i>a</i>                                                         | <i>1.3010</i>                                                                                  | <i>1.2870</i>                                                              | <i>1.3330</i>                                                               |
| C22–N2      | <i>a</i>                                                         | <i>1.3241</i>                                                                                  | <i>1.3303</i>                                                              | <i>1.3667</i>                                                               |
| C21–C22     | <i>a</i>                                                         | <i>1.4535</i>                                                                                  | <i>1.4632</i>                                                              | <i>1.4303</i>                                                               |
| C22–C23     | <i>a</i>                                                         | <i>1.4295</i>                                                                                  | <i>1.4273</i>                                                              | <i>1.4030</i>                                                               |
| C23–C24     | <i>a</i>                                                         | <i>1.3716</i>                                                                                  | <i>1.3693</i>                                                              | <i>1.3954</i>                                                               |
| C24–C25     | <i>a</i>                                                         | <i>1.4313</i>                                                                                  | <i>1.4345</i>                                                              | <i>1.4042</i>                                                               |
| C25–C26     | <i>a</i>                                                         | <i>1.3747</i>                                                                                  | <i>1.3723</i>                                                              | <i>1.3968</i>                                                               |
| C21–C26     | <i>a</i>                                                         | <i>1.4168</i>                                                                                  | <i>1.4228</i>                                                              | <i>1.3976</i>                                                               |
| Cl1–Os–Cl2  | 166.96(8)                                                        | <i>159.43</i>                                                                                  | <i>180</i>                                                                 | <i>180</i>                                                                  |
| O1–Os–N1    | 78.32(19)                                                        | <i>77.66</i>                                                                                   | <i>77.21</i>                                                               | <i>79.51</i>                                                                |
| O2–Os–N2    | 78.8(2)                                                          | <i>77.00</i>                                                                                   |                                                                            |                                                                             |
| O1–Os–N2    | 106.0(2)                                                         | <i>109.22</i>                                                                                  | <i>102.63</i>                                                              | <i>100.49</i>                                                               |
| O2–Os–N1    | 96.8(2)                                                          | <i>96.12</i>                                                                                   |                                                                            |                                                                             |
| MOS, Ring 1 | –1.03(8)                                                         | <i>–0.97(5)</i>                                                                                | <i>–0.73(6)</i>                                                            | <i>–1.51(9)</i>                                                             |
| MOS, Ring 2 | <i>a</i>                                                         | <i>–0.83(9)</i>                                                                                |                                                                            |                                                                             |

<sup>a</sup>Ring 2 is disordered in the X-ray structure of *trans*-(Diso)<sub>2</sub>OsCl<sub>2</sub>, so the bond distances are not measured reliably.



**Table S8.** Selected bond distances (Å), angles (°), and metrical oxidation states (MOS)<sup>S14</sup> for (Diso)<sub>2</sub>Ru(PPh<sub>3</sub>) and (Diso)<sub>2</sub>Os(PPh<sub>3</sub>). Values given in Roman type are from the crystal structures. Values given in italics are from DFT calculations on (ap)<sub>2</sub>M(PMe<sub>3</sub>) (ap = C<sub>6</sub>H<sub>4</sub>(NH)O). Values in red are from calculations where the (ap)<sub>2</sub>M(P) substructure is constrained to have C<sub>2</sub> symmetry (the methyl groups cannot adhere to this symmetry and are unconstrained).

| Parameter   | (Diso) <sub>2</sub> Ru(PPh <sub>3</sub> ) |                 |                                 | (Diso) <sub>2</sub> Os(PPh <sub>3</sub> ) |                 |                                 |
|-------------|-------------------------------------------|-----------------|---------------------------------|-------------------------------------------|-----------------|---------------------------------|
|             | X-ray                                     | <i>DFT</i>      | <i>DFT pseudo-C<sub>2</sub></i> | X-ray                                     | <i>DFT</i>      | <i>DFT pseudo-C<sub>2</sub></i> |
| M–O1        | 2.0852(13)                                | <i>2.0832</i>   | <i>2.0745</i>                   | 2.0960(15)                                | <i>2.1173</i>   | <i>2.0963</i>                   |
| M–O2        | 2.0201(12)                                | <i>2.0659</i>   |                                 | 2.0167(15)                                | <i>2.0687</i>   |                                 |
| M–N1        | 1.9396(15)                                | <i>1.9578</i>   | <i>1.9623</i>                   | 1.9331(17)                                | <i>1.9577</i>   | <i>1.9661</i>                   |
| M–N2        | 1.9918(15)                                | <i>1.9674</i>   |                                 | 1.9874(17)                                | <i>1.9788</i>   |                                 |
| M–P         | 2.2853(5)                                 | <i>2.2571</i>   | <i>2.2592</i>                   | 2.2881(6)                                 | <i>2.2773</i>   | <i>2.2771</i>                   |
| C11–O1      | 1.319(2)                                  | <i>1.3138</i>   | <i>1.3124</i>                   | 1.327(3)                                  | <i>1.3207</i>   | <i>1.3183</i>                   |
| C12–N1      | 1.386(2)                                  | <i>1.3691</i>   | <i>1.3680</i>                   | 1.399(3)                                  | <i>1.3820</i>   | <i>1.3788</i>                   |
| C11–C12     | 1.415(2)                                  | <i>1.4351</i>   | <i>1.4358</i>                   | 1.410(3)                                  | <i>1.4273</i>   | <i>1.4290</i>                   |
| C12–C13     | 1.401(3)                                  | <i>1.4113</i>   | <i>1.4119</i>                   | 1.399(3)                                  | <i>1.4057</i>   | <i>1.4074</i>                   |
| C13–C14     | 1.380(3)                                  | <i>1.3856</i>   | <i>1.3851</i>                   | 1.380(3)                                  | <i>1.3891</i>   | <i>1.3876</i>                   |
| C14–C15     | 1.411(3)                                  | <i>1.4129</i>   | <i>1.4136</i>                   | 1.401(3)                                  | <i>1.4091</i>   | <i>1.4110</i>                   |
| C15–C16     | 1.386(3)                                  | <i>1.3875</i>   | <i>1.3870</i>                   | 1.392(3)                                  | <i>1.3902</i>   | <i>1.3888</i>                   |
| C11–C16     | 1.429(2)                                  | <i>1.4122</i>   | <i>1.4125</i>                   | 1.423(3)                                  | <i>1.4092</i>   | <i>1.4099</i>                   |
| C21–O2      | 1.315(2)                                  | <i>1.3121</i>   | <i>1.3124</i>                   | 1.331(2)                                  | <i>1.3203</i>   | <i>1.3183</i>                   |
| C22–N2      | 1.384(2)                                  | <i>1.3671</i>   | <i>1.3680</i>                   | 1.392(3)                                  | <i>1.3754</i>   | <i>1.3788</i>                   |
| C21–C22     | 1.414(2)                                  | <i>1.4360</i>   | <i>1.4358</i>                   | 1.403(3)                                  | <i>1.4284</i>   | <i>1.4290</i>                   |
| C22–C23     | 1.411(2)                                  | <i>1.4124</i>   | <i>1.4119</i>                   | 1.407(3)                                  | <i>1.4091</i>   | <i>1.4074</i>                   |
| C23–C24     | 1.377(2)                                  | <i>1.3848</i>   | <i>1.3851</i>                   | 1.380(3)                                  | <i>1.3866</i>   | <i>1.3876</i>                   |
| C24–C25     | 1.417(3)                                  | <i>1.4141</i>   | <i>1.4136</i>                   | 1.414(3)                                  | <i>1.4120</i>   | <i>1.4110</i>                   |
| C25–C26     | 1.385(2)                                  | <i>1.3866</i>   | <i>1.3870</i>                   | 1.389(3)                                  | <i>1.3882</i>   | <i>1.3888</i>                   |
| C21–C26     | 1.428(2)                                  | <i>1.4125</i>   | <i>1.4125</i>                   | 1.421(3)                                  | <i>1.4089</i>   | <i>1.4099</i>                   |
| O1–M–N1     | 78.21(6)                                  | <i>78.69</i>    | <i>78.74</i>                    | 77.82(7)                                  | <i>77.59</i>    | <i>77.82</i>                    |
| O2–M–N2     | 79.05(5)                                  | <i>78.76</i>    |                                 | 78.81(7)                                  | <i>77.96</i>    |                                 |
| O1–M–N2     | 104.48(5)                                 | <i>100.69</i>   | <i>99.81</i>                    | 103.87(6)                                 | <i>102.08</i>   | <i>100.41</i>                   |
| O2–M–N1     | 92.74(6)                                  | <i>99.09</i>    |                                 | 93.01(7)                                  | <i>98.47</i>    |                                 |
| N1–M–N2     | 149.54(6)                                 | <i>159.73</i>   | <i>159.29</i>                   | 148.17(7)                                 | <i>156.07</i>   | <i>154.22</i>                   |
| O1–M–O2     | 167.64(5)                                 | <i>172.22</i>   | <i>172.08</i>                   | 166.69(6)                                 | <i>170.52</i>   | <i>172.19</i>                   |
| P–M–O1      | 83.23(4)                                  | <i>89.40</i>    | <i>93.96</i>                    | 82.34(4)                                  | <i>84.35</i>    | <i>93.91</i>                    |
| P–M–O2      | 108.04(4)                                 | <i>98.37</i>    |                                 | 110.23(5)                                 | <i>105.12</i>   |                                 |
| P–M–N1      | 110.41(5)                                 | <i>103.47</i>   | <i>100.35</i>                   | 111.47(5)                                 | <i>108.19</i>   | <i>102.89</i>                   |
| P–M–N2      | 100.00(4)                                 | <i>96.77</i>    |                                 | 100.16(5)                                 | <i>95.49</i>    |                                 |
| MOS, Ring 1 | –1.42(9)                                  | <i>–1.28(5)</i> | <i>–1.27(5)</i>                 | –1.59(11)                                 | <i>–1.39(5)</i> | <i>–1.40(6)</i>                 |
| MOS, Ring 2 | –1.35(10)                                 | <i>–1.26(5)</i> |                                 | –1.55(11)                                 | <i>–1.45(6)</i> |                                 |

**Figure S1.** Thermal ellipsoid plot of *cis*-(Diso)<sub>2</sub>OsCl<sub>2</sub>, with hydrogen atoms omitted for clarity.

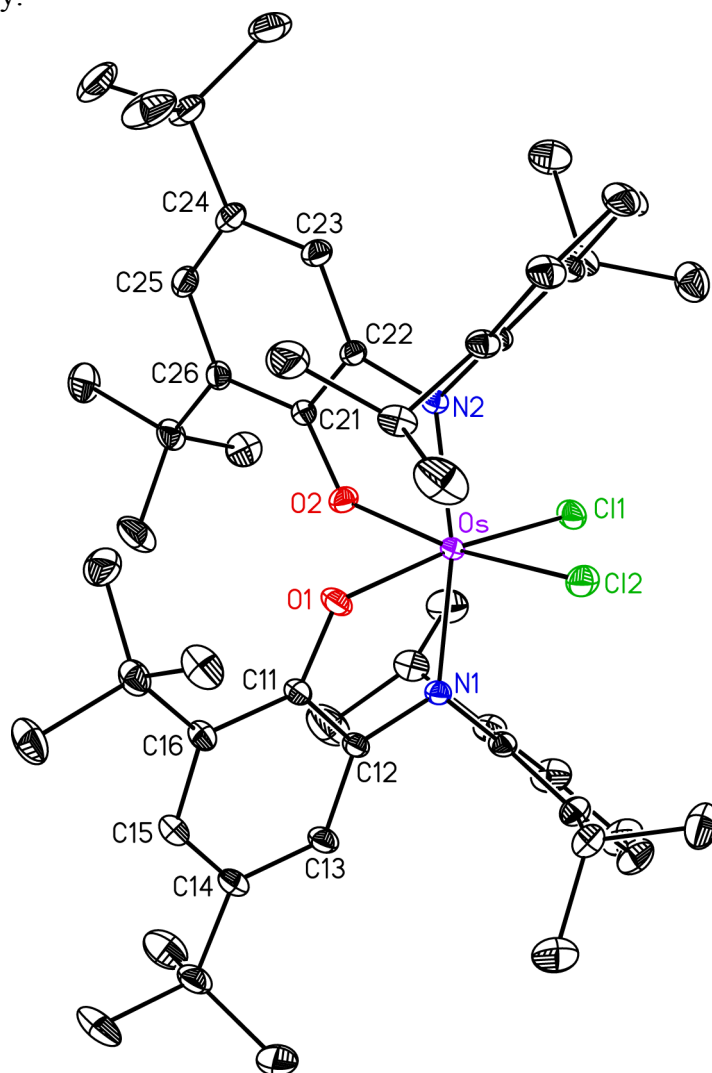

**Figure S2.** Thermal ellipsoid plot of *trans*-(Diso)<sub>2</sub>OsCl<sub>2</sub>, with hydrogen atoms omitted for clarity. Only one orientation of disordered iminoxolene ring 2 is shown.

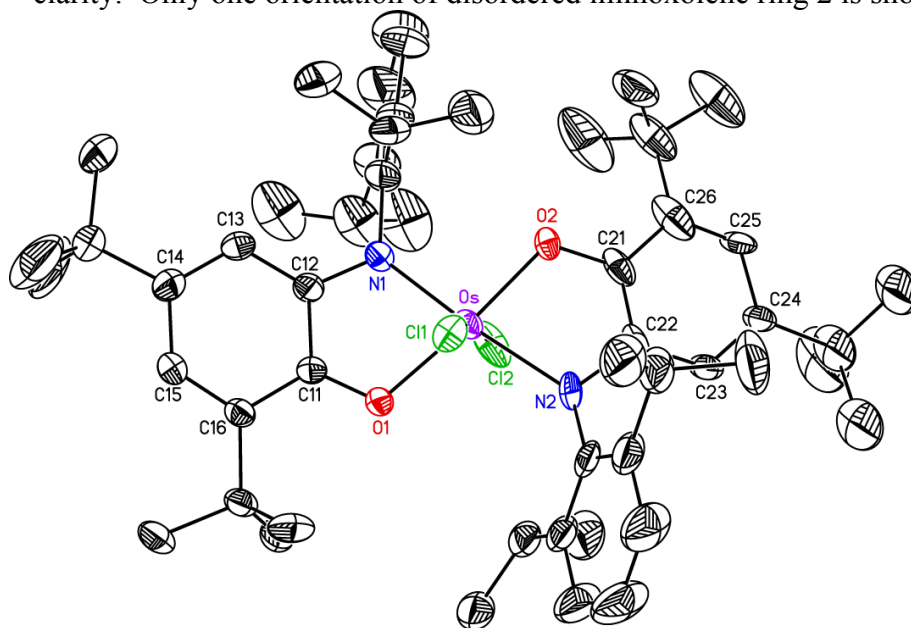

**Figure S3.** Thermal ellipsoid plot of CF<sub>3</sub>Tio, with hydrogen atoms omitted for clarity. Only the major orientation of the iminoquinone and of the disordered CF<sub>3</sub> group centered at C47 is shown.

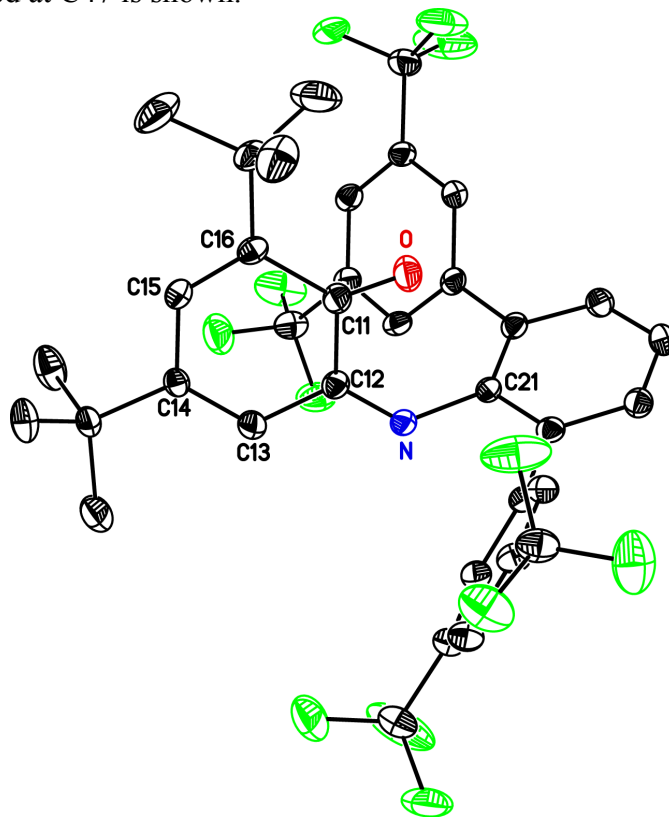

**Figure S4.** Thermal ellipsoid plot of *trans*-(CF<sub>3</sub>Tio)<sub>2</sub>RuCl<sub>2</sub>, with hydrogen atoms omitted for clarity. Only the major orientations of the four disordered CF<sub>3</sub> groups are shown.

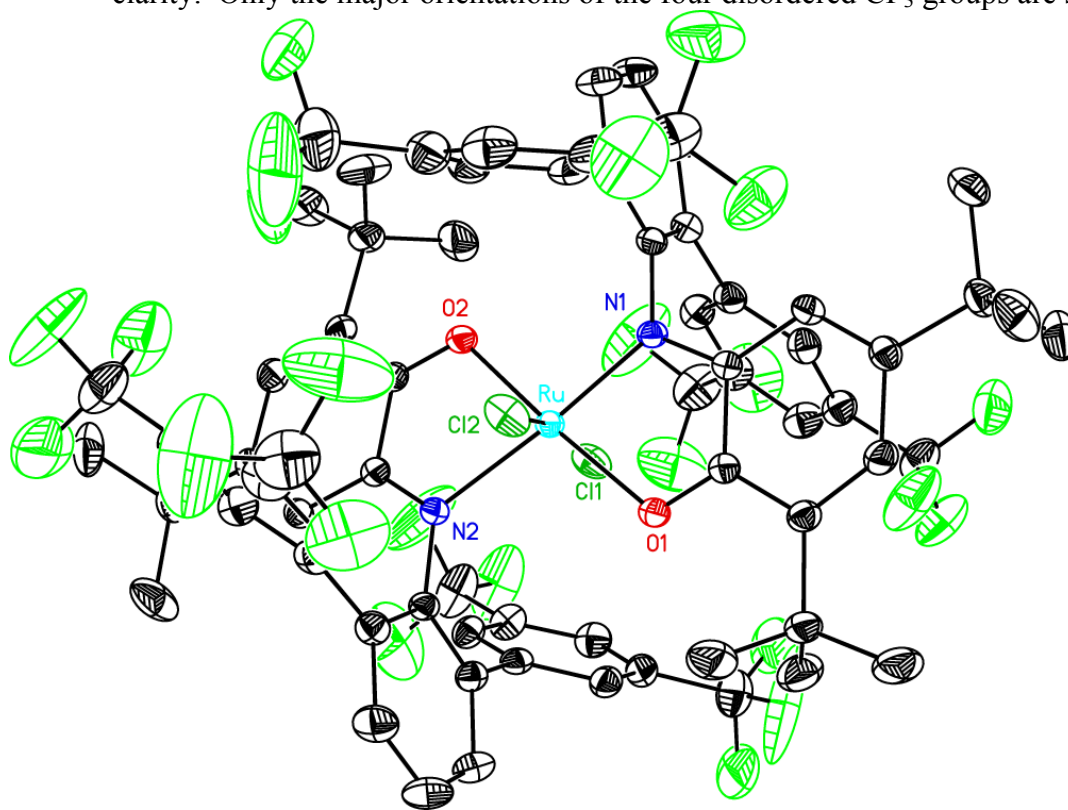

**Figure S5.** Thermal ellipsoid plot of  $(\text{Diso})_2\text{Os}(\text{PPh}_3) \cdot 2 \text{CH}_2\text{Cl}_2$ , with hydrogen atoms and solvent molecules omitted for clarity. Only the major orientation of the disordered *tert*-butyl group is shown.

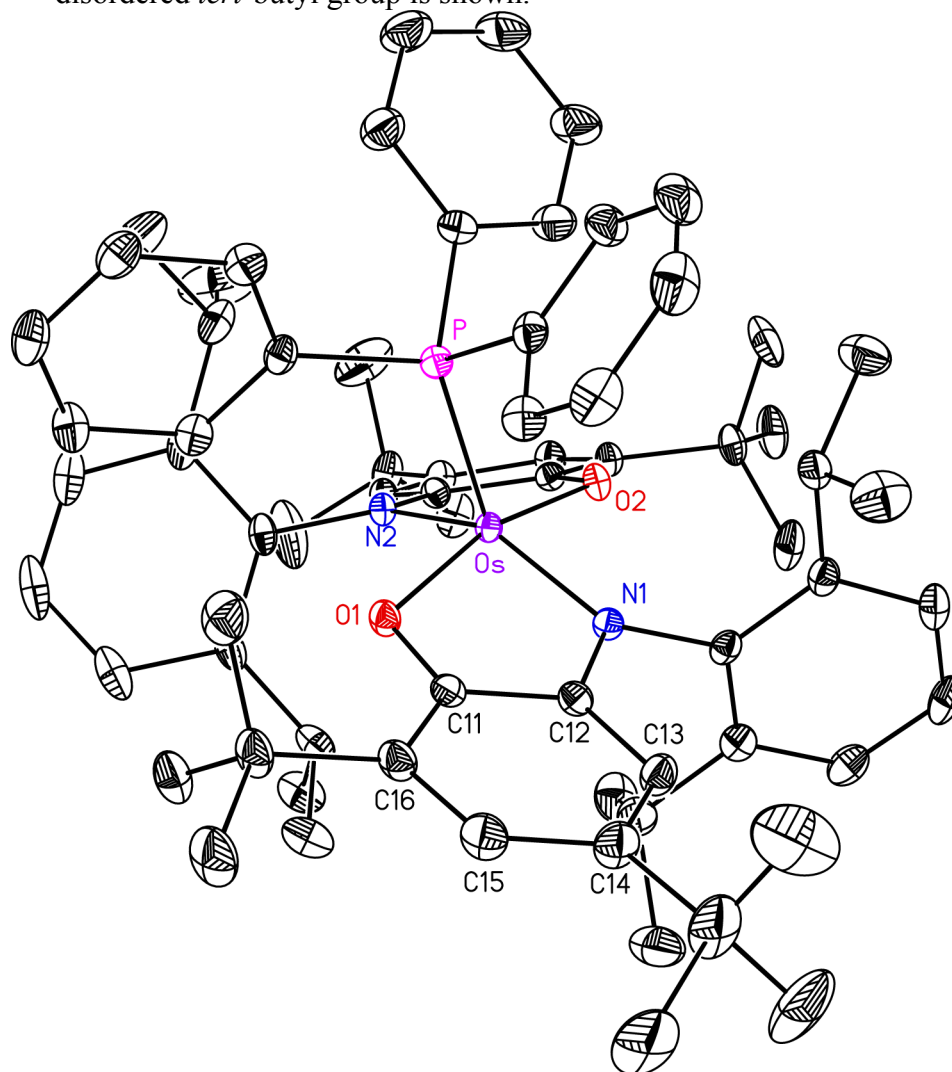

III.  $^1\text{H}$  NMR spectra**Figure S6.**  $^1\text{H}$  NMR spectrum of *cis*-(Diso) $_2\text{RuCl}_2$  ( $\text{CDCl}_3$ , 400 MHz)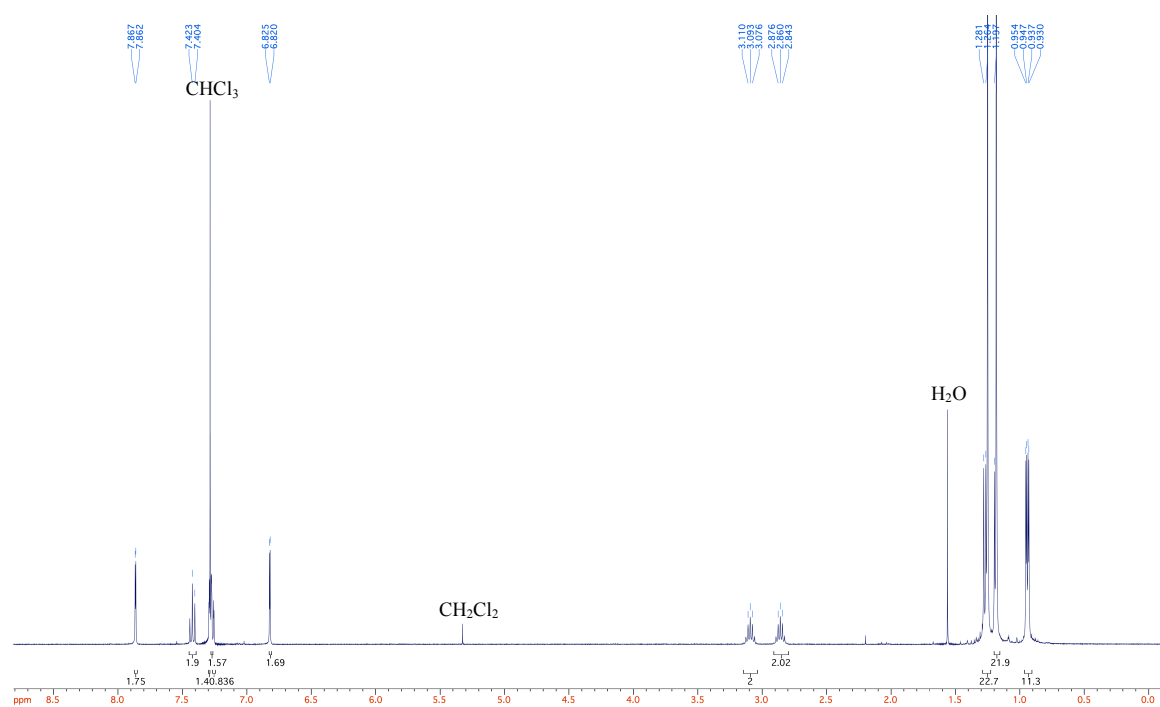**Figure S7.**  $^1\text{H}$  NMR spectrum of *trans*-(Diso) $_2\text{RuCl}_2$  ( $\text{CDCl}_3$ , 400 MHz)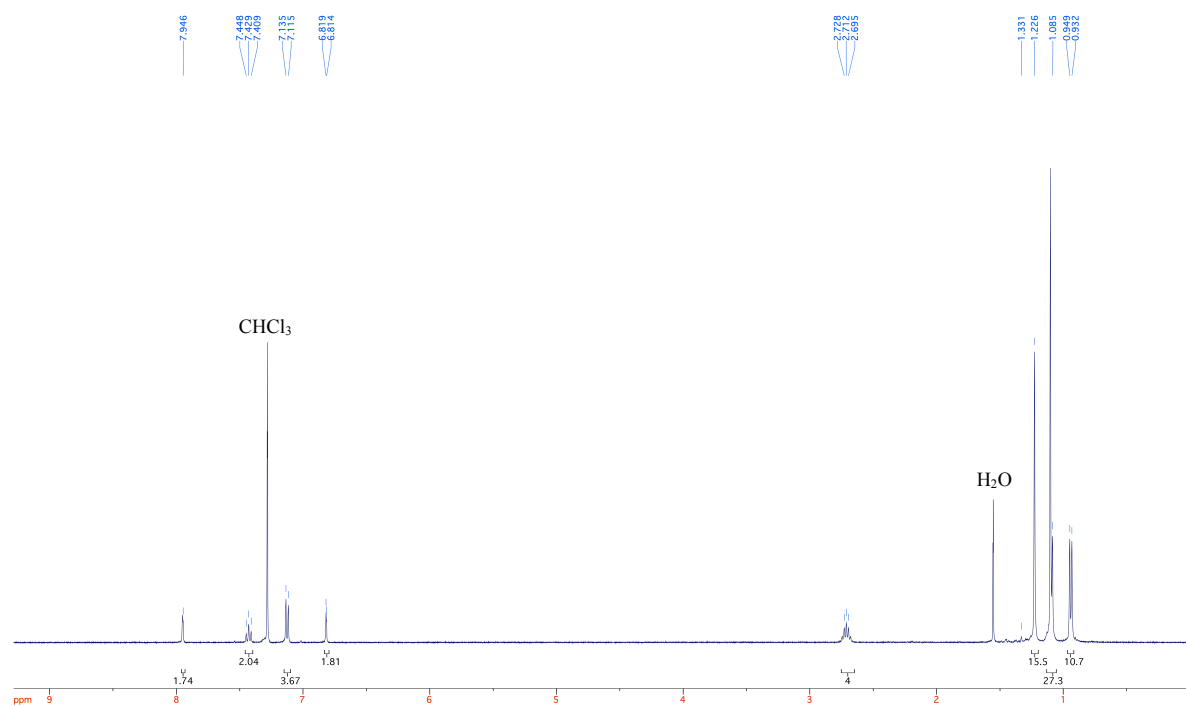

**Figure S8.**  $^1\text{H}$  NMR spectrum of *cis*-(Diso) $_2\text{OsCl}_2$  ( $\text{CD}_2\text{Cl}_2$ , 400 MHz)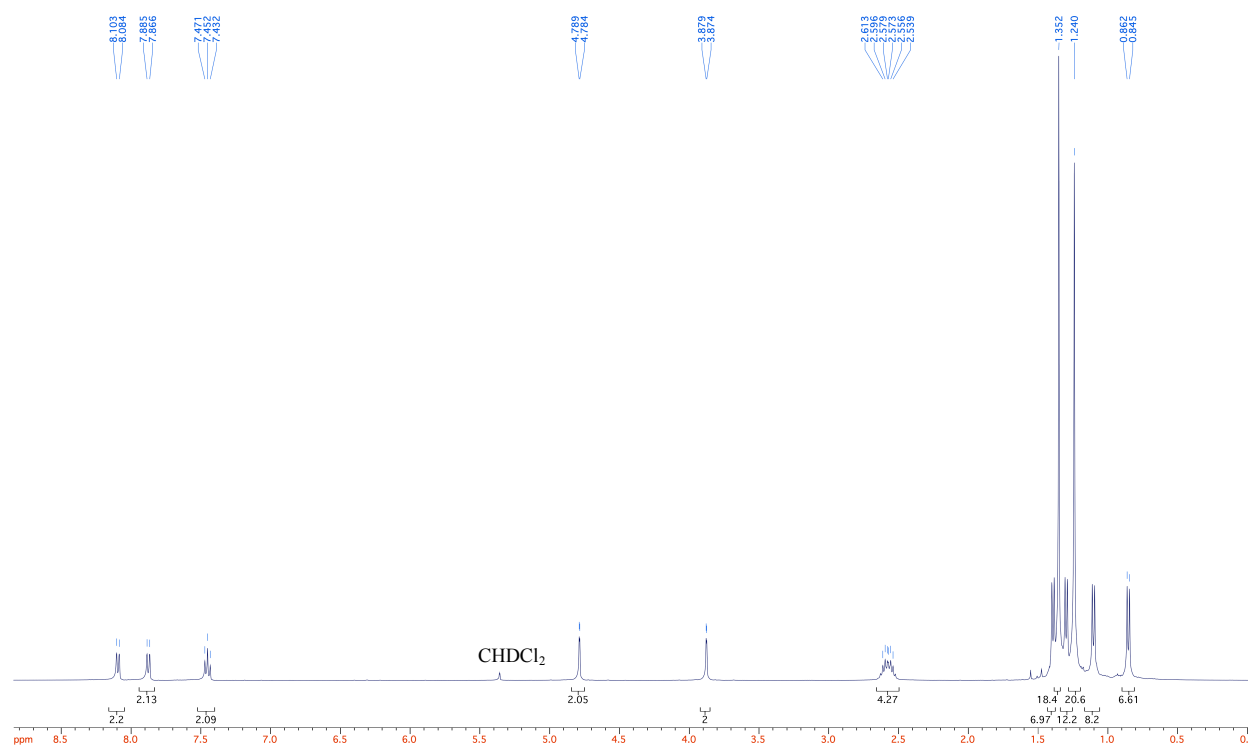**Figure S9.**  $^1\text{H}$  NMR spectrum of *trans*-(Diso) $_2\text{OsCl}_2$ . Signals due to paramagnetic impurities marked with **P**. ( $\text{CD}_2\text{Cl}_2$ , 400 MHz)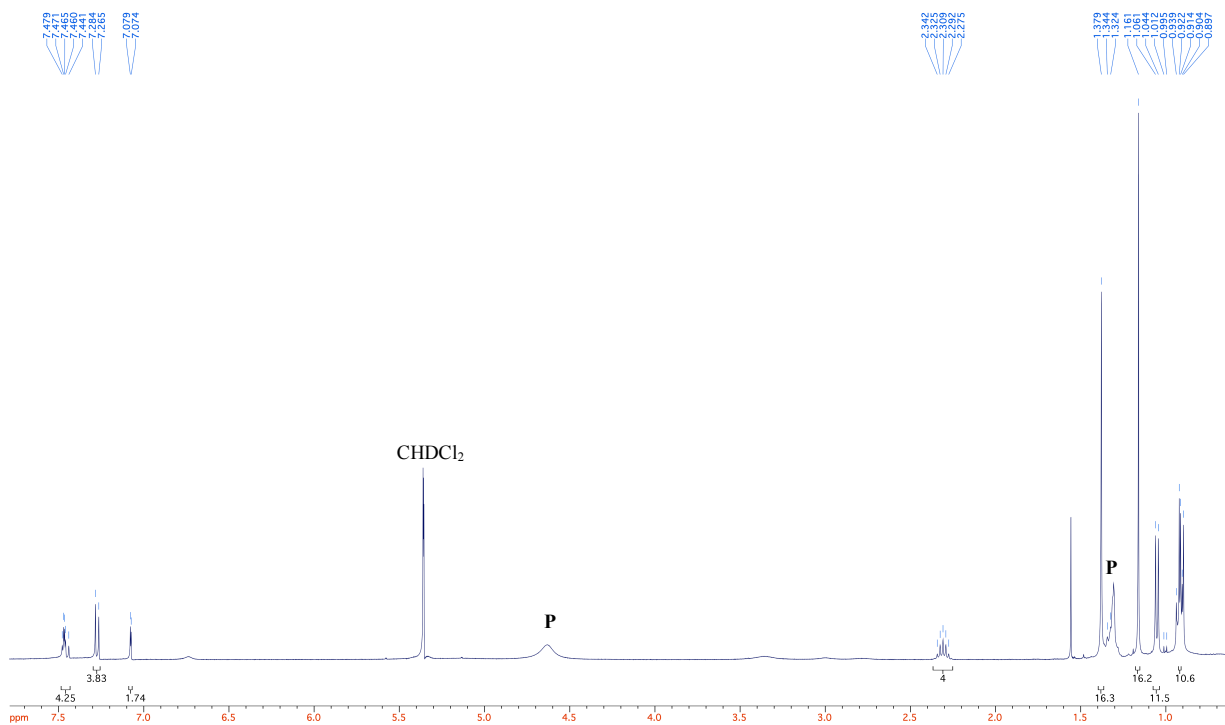

**Figure S10.**  $^1\text{H}$  NMR spectrum of  $\text{CF}_3\text{Tio}$  ( $\text{CDCl}_3$ , 400 MHz)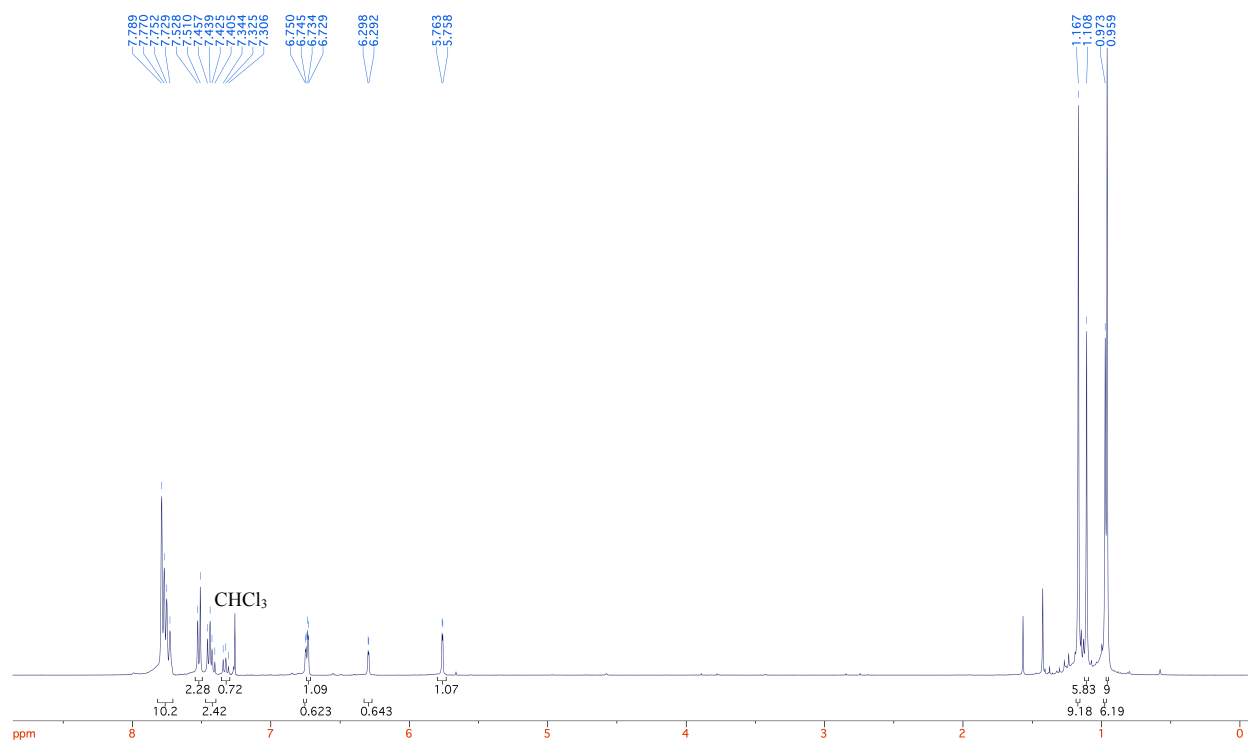**Figure S11.**  $^1\text{H}$  NMR spectrum of *trans*- $(\text{CF}_3\text{Tio})_2\text{RuCl}_2$  ( $\text{CD}_2\text{Cl}_2$ , 400 MHz)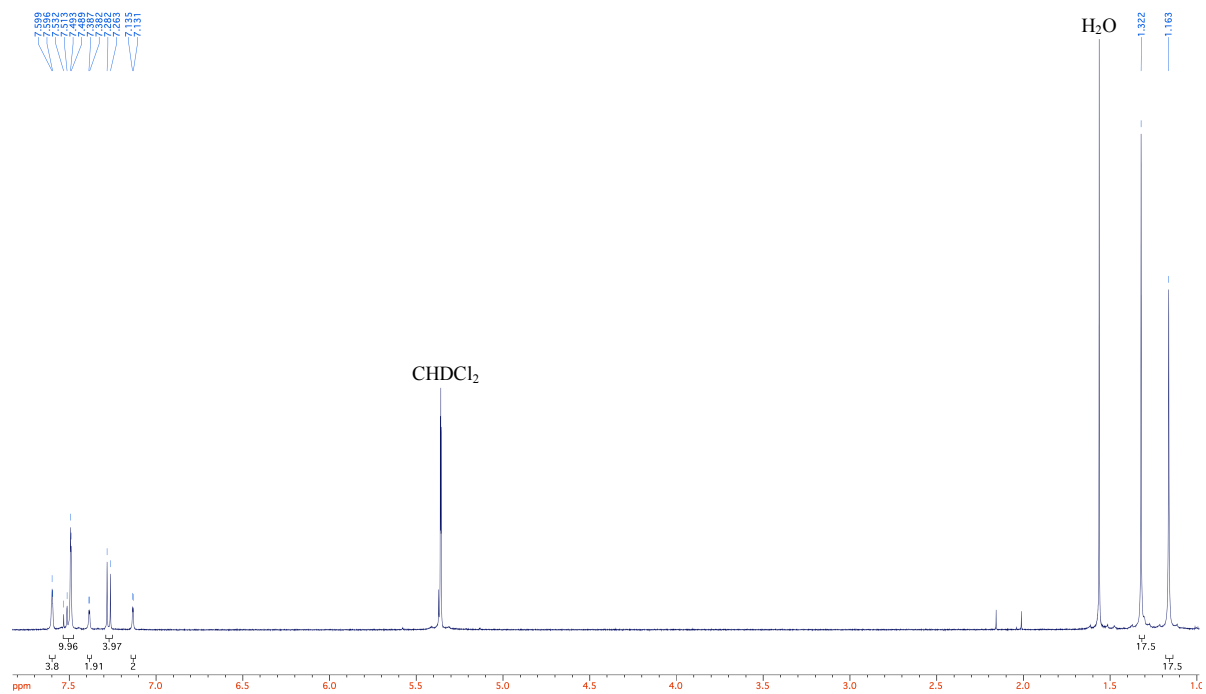





**Figure S14.**  $^1\text{H}$  NMR spectrum of  $(\text{Diso})_2\text{Os}(\text{PPh}_3)$  ( $\text{CD}_2\text{Cl}_2$ ,  $-78^\circ\text{C}$ , 400 MHz)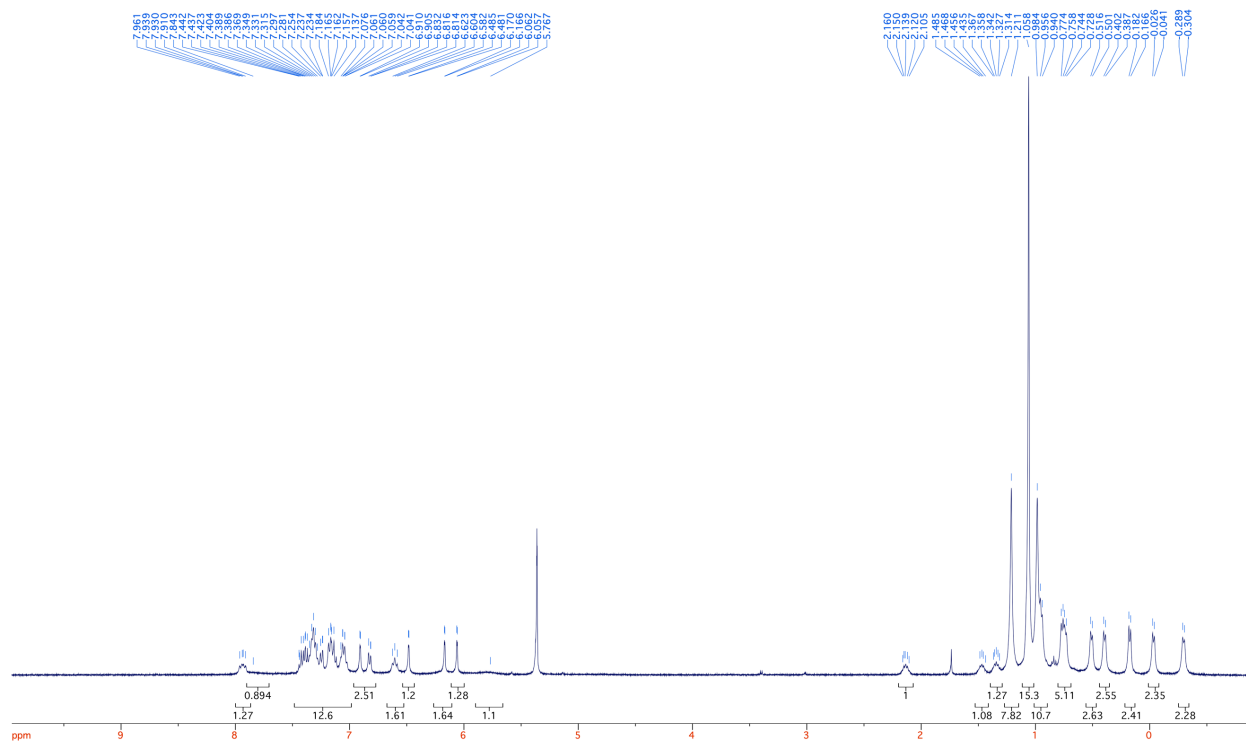

IV.  $^{13}\text{C}\{^1\text{H}\}$  NMR spectra**Figure S15.**  $^{13}\text{C}\{^1\text{H}\}$  NMR spectrum of *cis*-(Diso) $_2$ RuCl $_2$  (CDCl $_3$ , 100.58 MHz)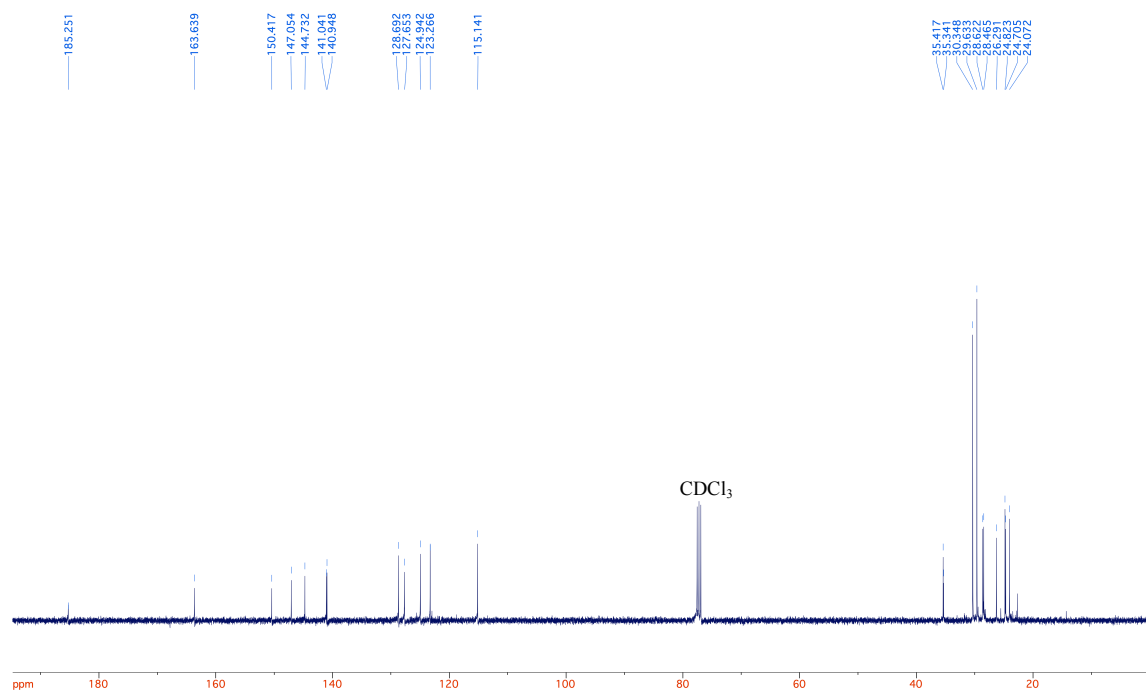**Figure S16.**  $^{13}\text{C}\{^1\text{H}\}$  NMR spectrum of *trans*-(Diso) $_2$ RuCl $_2$  (CD $_2$ Cl $_2$ , 100.58 MHz)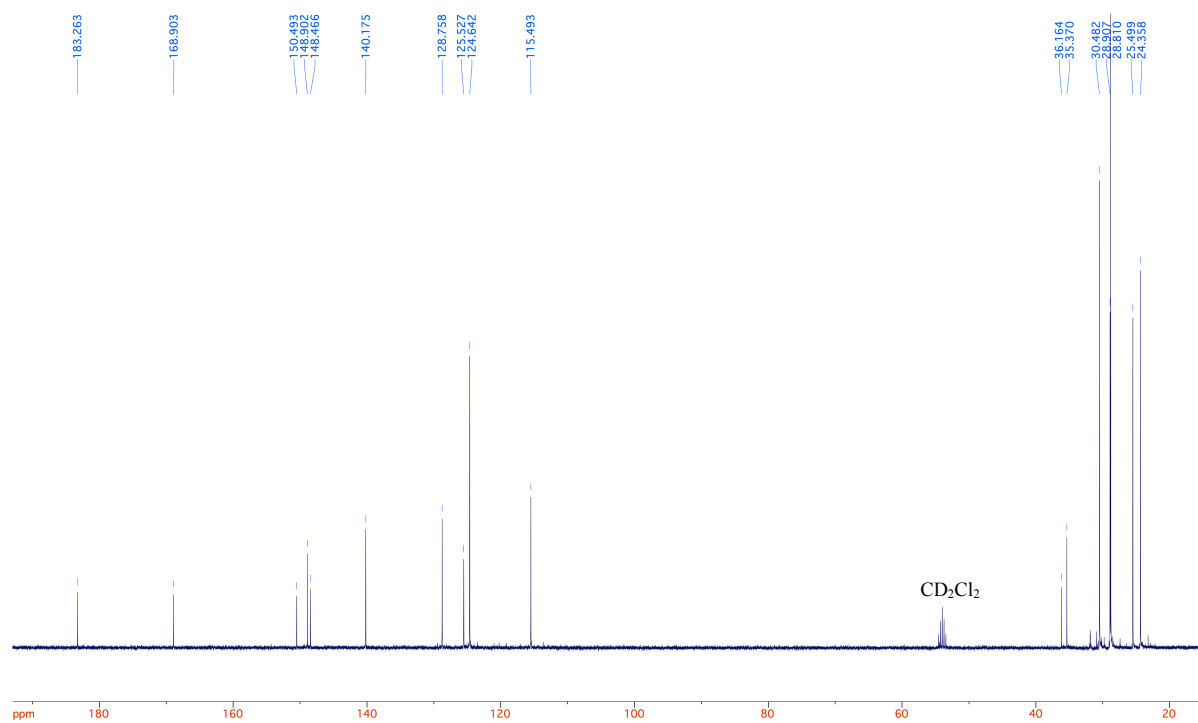

**Figure S17.**  $^{13}\text{C}\{^1\text{H}\}$  NMR spectrum of *cis*-(Diso) $_2\text{OsCl}_2$  ( $\text{CD}_2\text{Cl}_2$ , 100.58 MHz)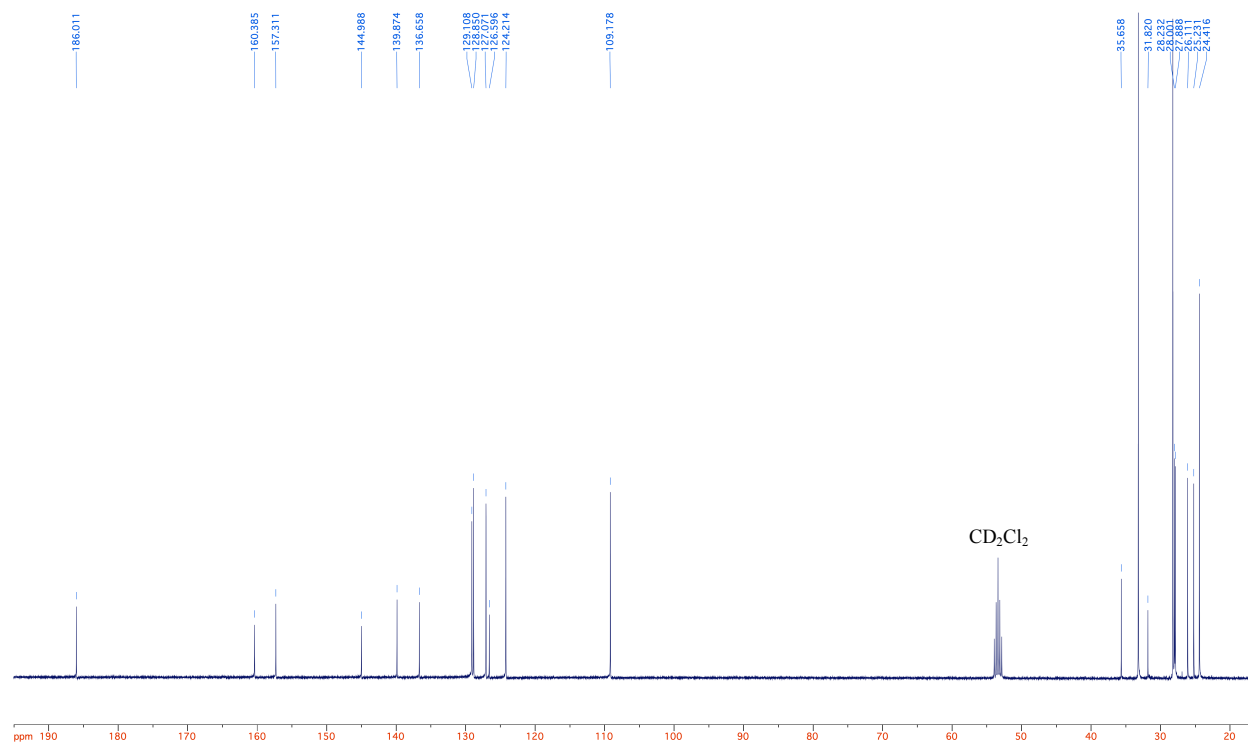**Figure S18.**  $^{13}\text{C}\{^1\text{H}\}$  NMR spectrum of  $\text{CF}_3\text{Tio}$  ( $\text{CDCl}_3$ , 100.58 MHz)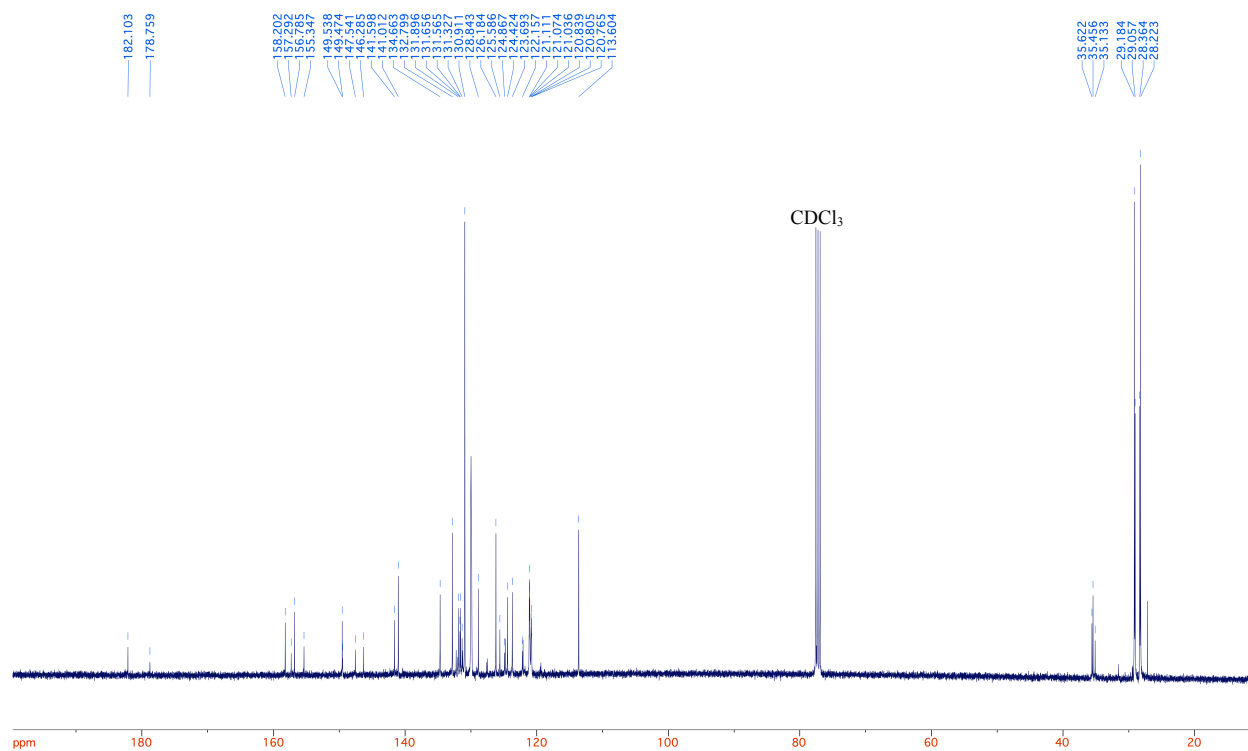

**Figure S19.**  $^{13}\text{C}\{^1\text{H}\}$  NMR spectrum of 80:20 *cis*-/*trans*-( $\text{CF}_3\text{Tio}$ ) $_2\text{RuCl}_2$  mixture ( $\text{CD}_2\text{Cl}_2$ , 100.58 MHz)

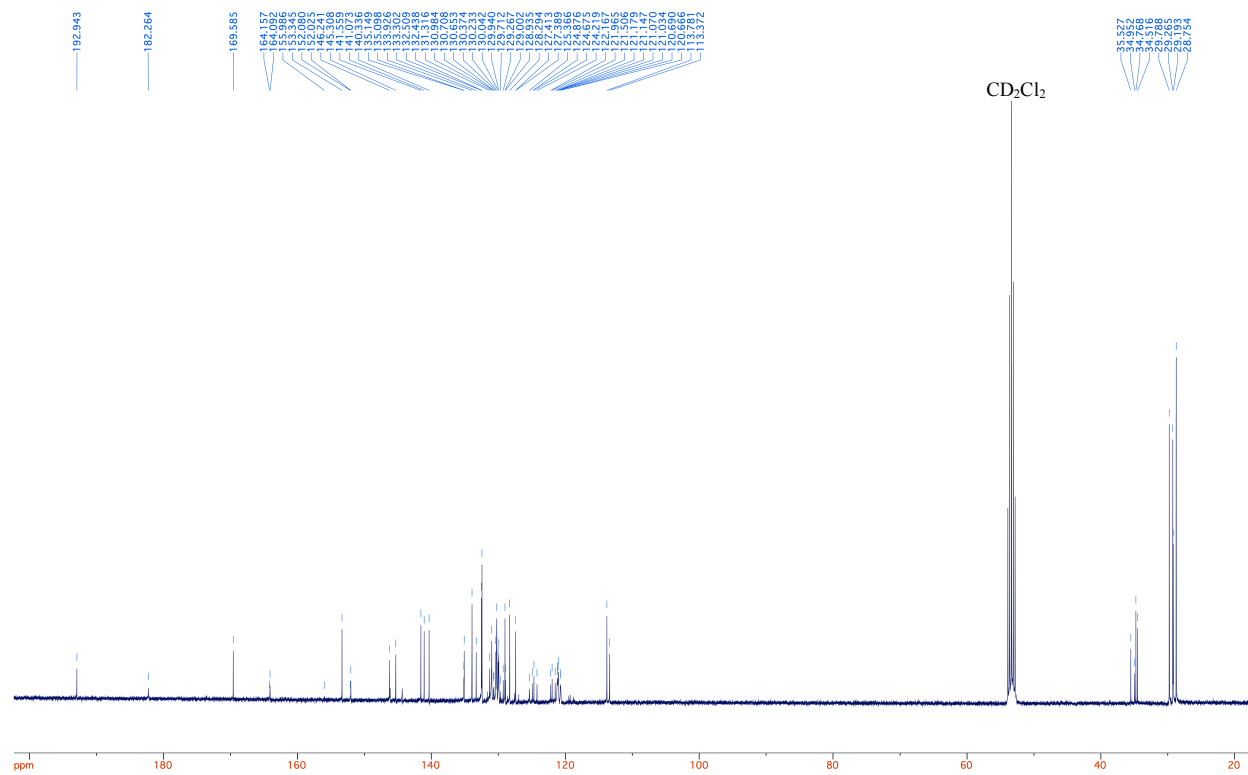

V.  $^{19}\text{F}\{^1\text{H}\}$  NMR spectra**Figure S20.**  $^{19}\text{F}\{^1\text{H}\}$  NMR spectrum of  $\text{CF}_3\text{Tio}$  ( $\text{CD}_2\text{Cl}_2$ , 376.5 MHz)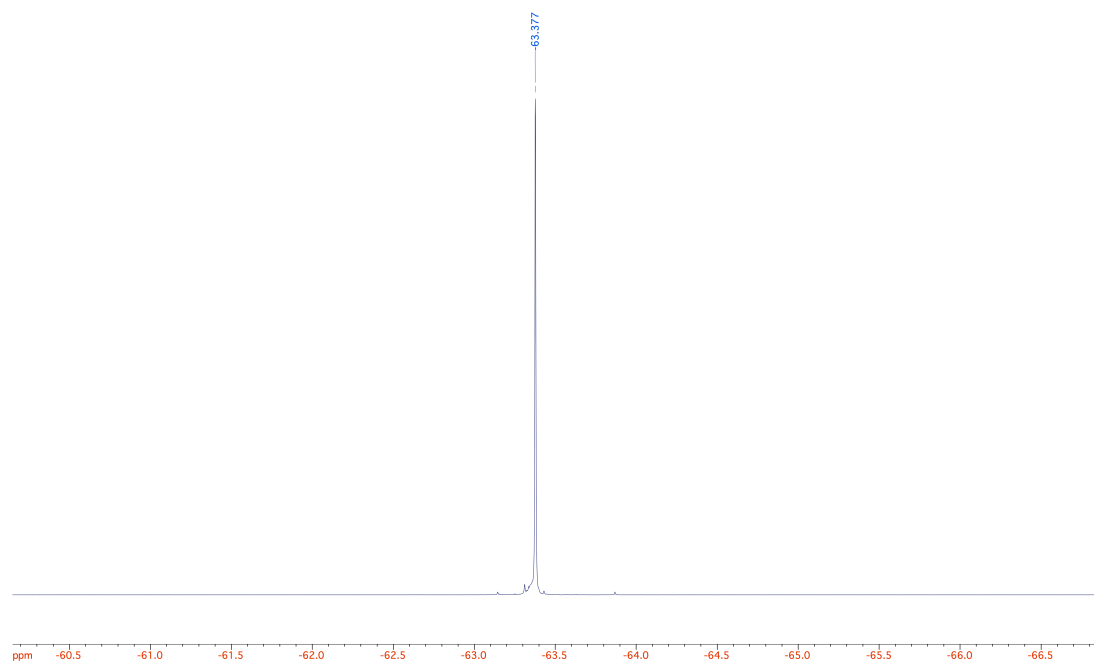**Figure S21.**  $^{19}\text{F}\{^1\text{H}\}$  NMR spectrum of *trans*- $(\text{CF}_3\text{Tio})_2\text{RuCl}_2$  ( $\text{CD}_2\text{Cl}_2$ , 376.5 MHz)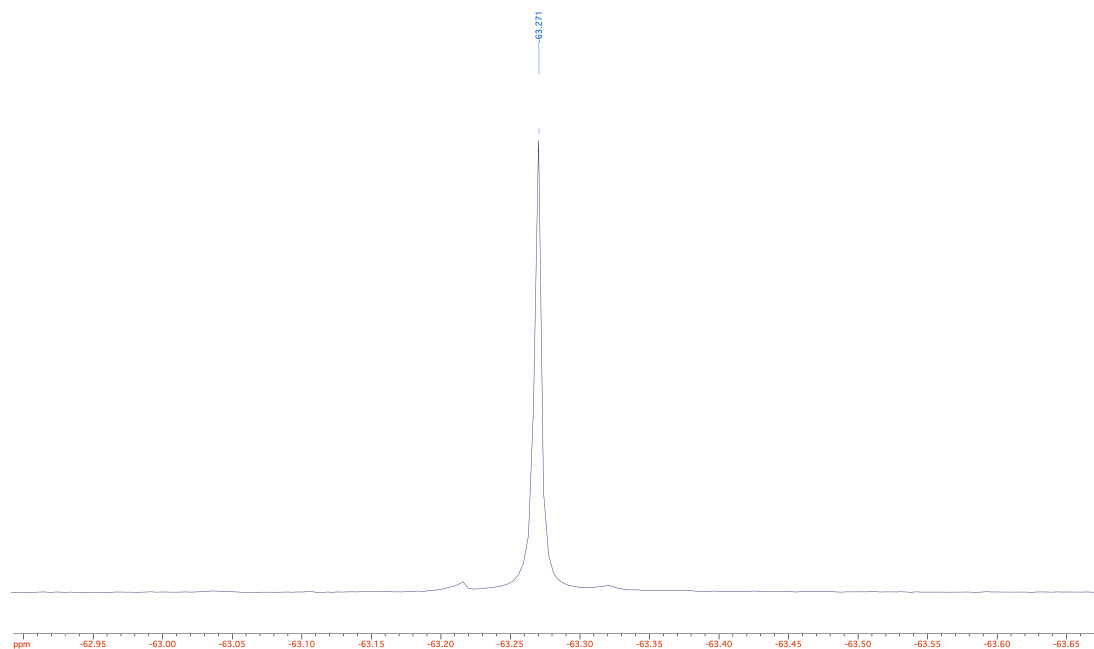

**Figure S22.**  $^{19}\text{F}\{^1\text{H}\}$  NMR spectrum of 80:20 *cis*-/*trans*-( $\text{CF}_3\text{Tio}$ ) $_2\text{RuCl}_2$  mixture ( $\text{CD}_2\text{Cl}_2$ , 376.5 MHz)

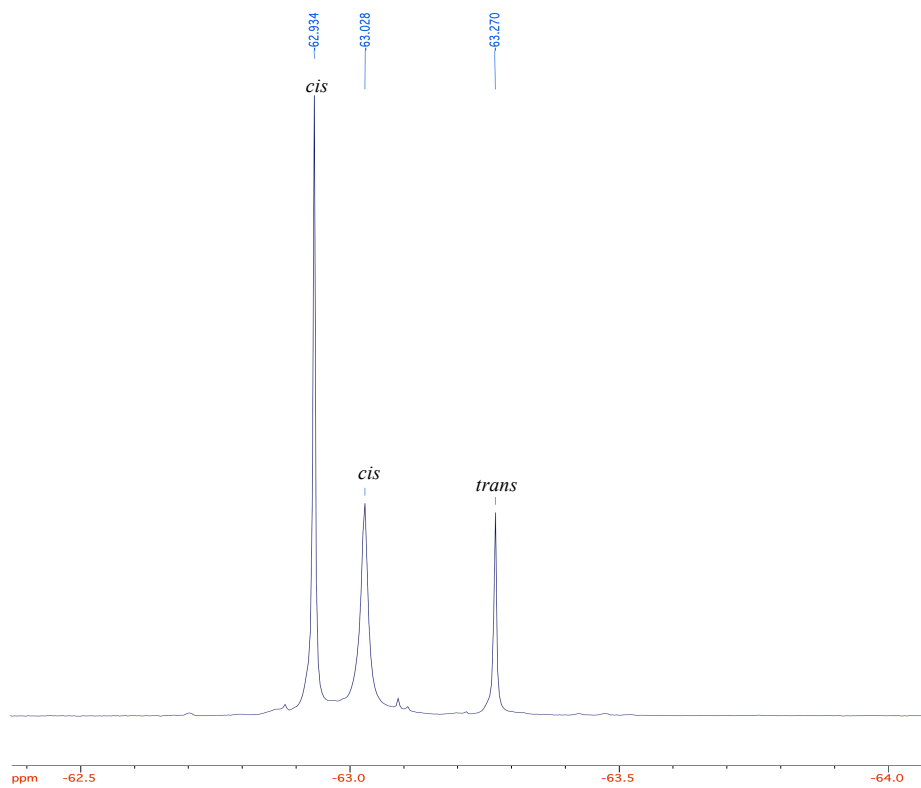

VI.  $^{31}\text{P}\{^1\text{H}\}$  NMR spectra**Figure S23.**  $^{31}\text{P}\{^1\text{H}\}$  NMR spectrum of  $(\text{Diso})_2\text{Ru}(\text{PPh}_3)$  ( $\text{CD}_2\text{Cl}_2$ , 162.0 MHz)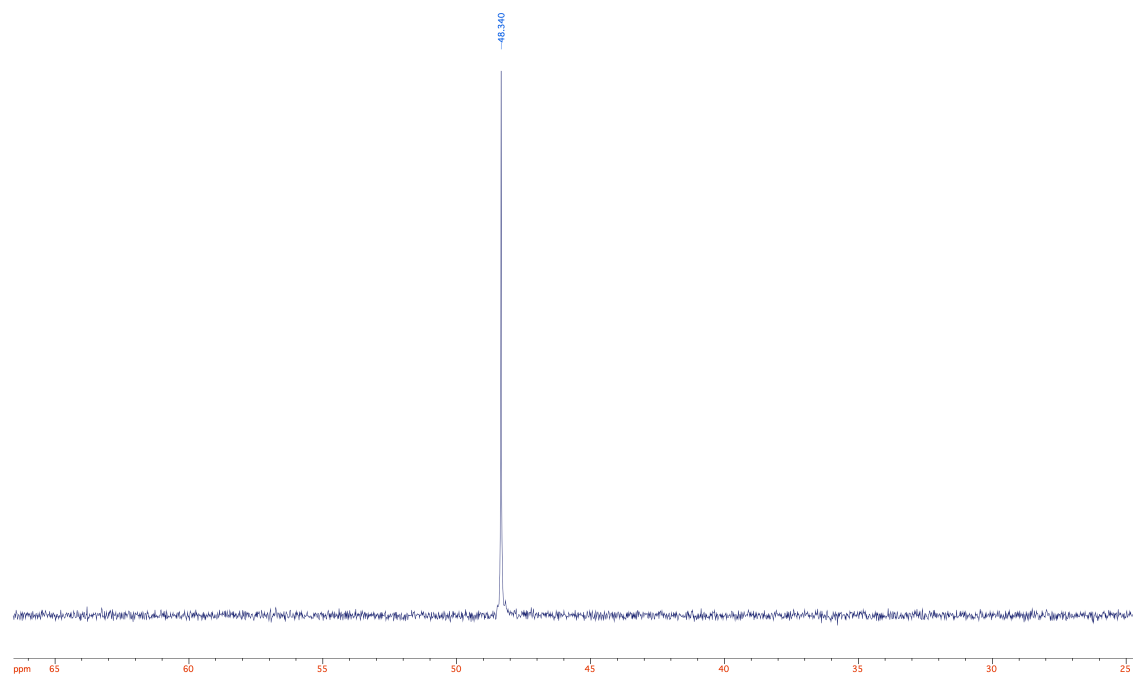**Figure S24.**  $^{31}\text{P}\{^1\text{H}\}$  NMR spectrum of  $(\text{Diso})_2\text{Os}(\text{PPh}_3)$  ( $\text{CD}_2\text{Cl}_2$ , 162.0 MHz)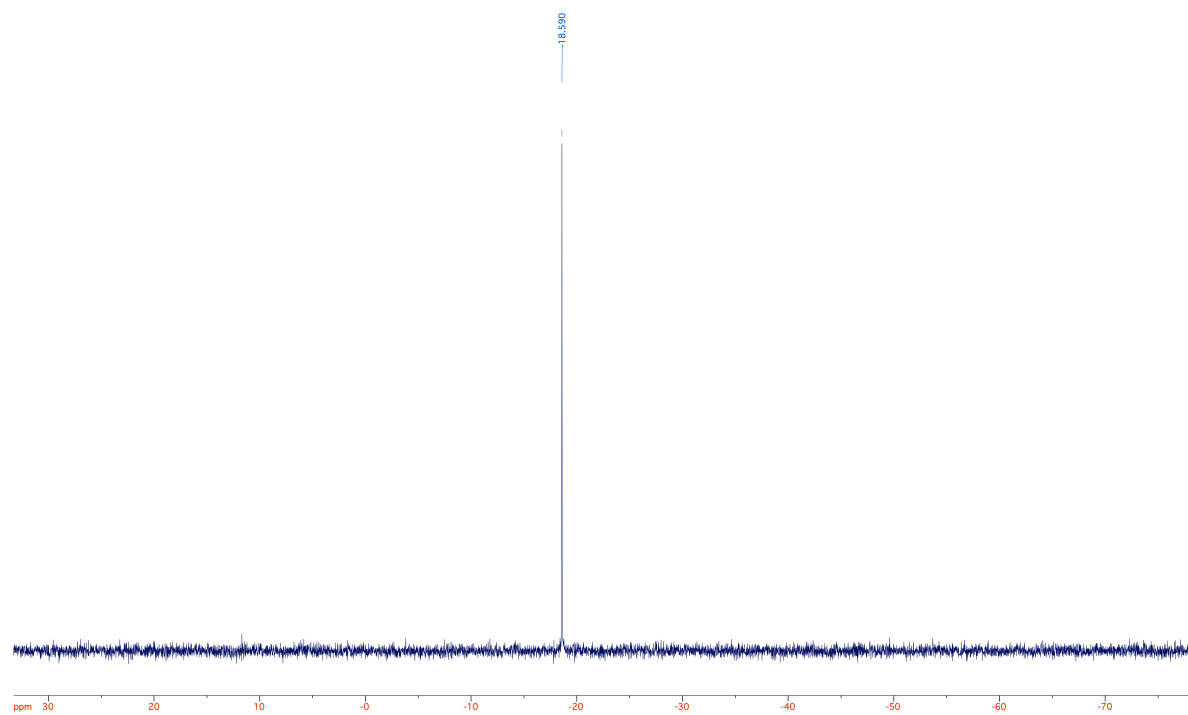



## VII. Infrared spectra

**Figure S25.** Infrared spectrum of *cis*-(Diso)<sub>2</sub>RuCl<sub>2</sub> (ATR)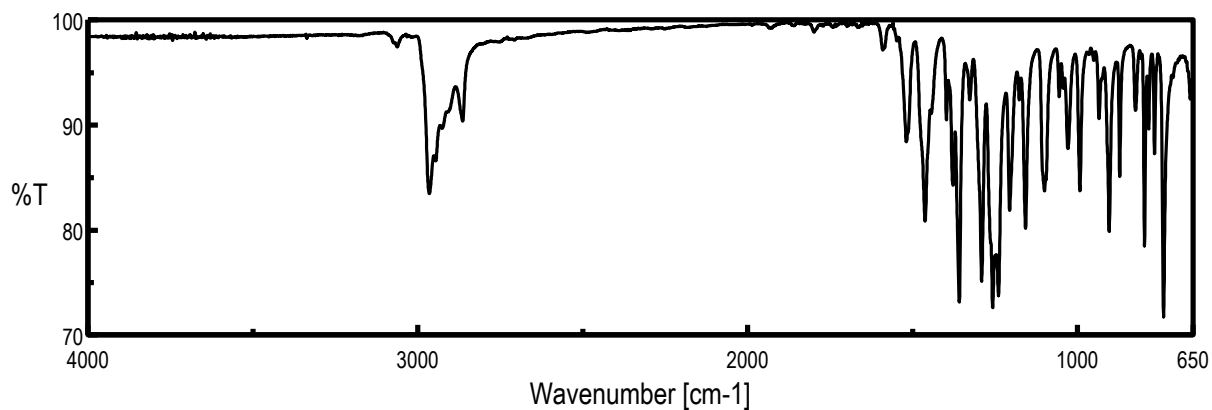**Figure S26.** Infrared spectrum of *trans*-(Diso)<sub>2</sub>RuCl<sub>2</sub> (ATR)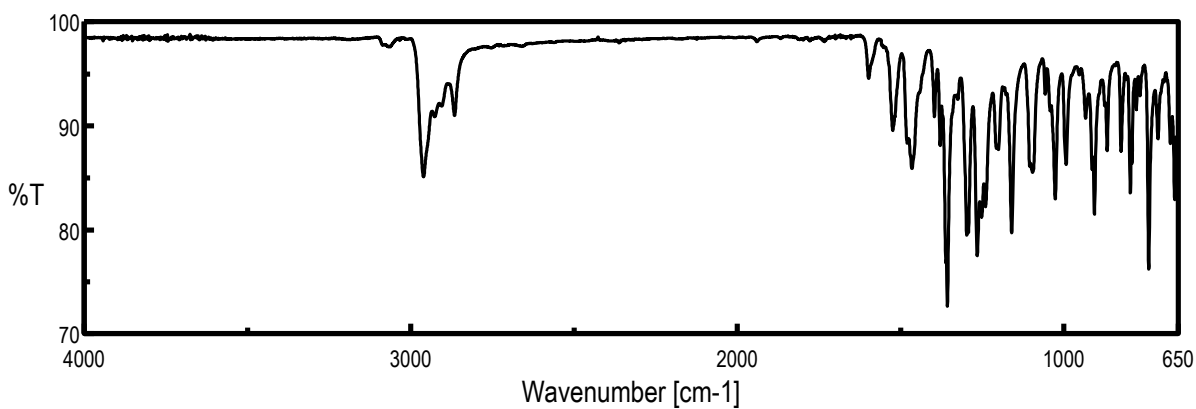**Figure S27.** Infrared spectrum of *cis*-(Diso)<sub>2</sub>OsCl<sub>2</sub> (evapd film)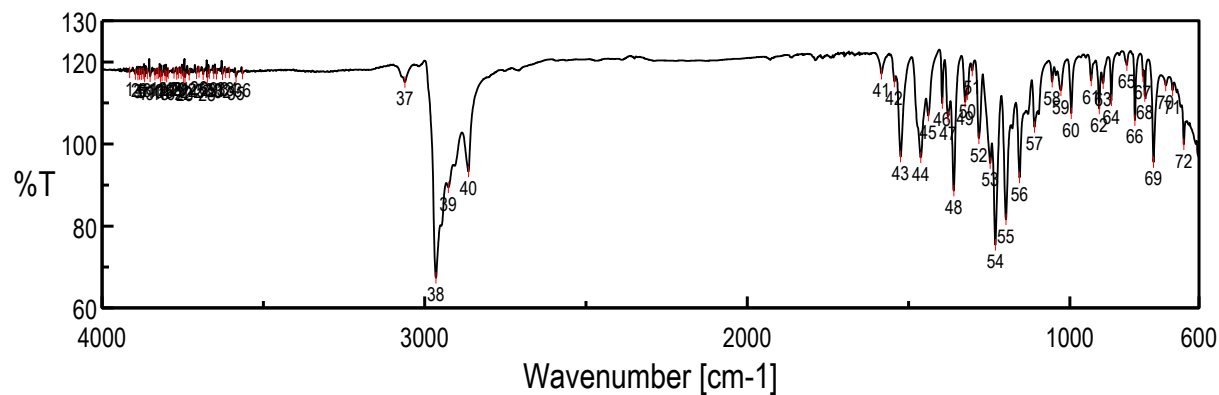

**Figure S28.** Infrared spectrum of  $\text{CF}_3\text{Tio}$  (evapd film)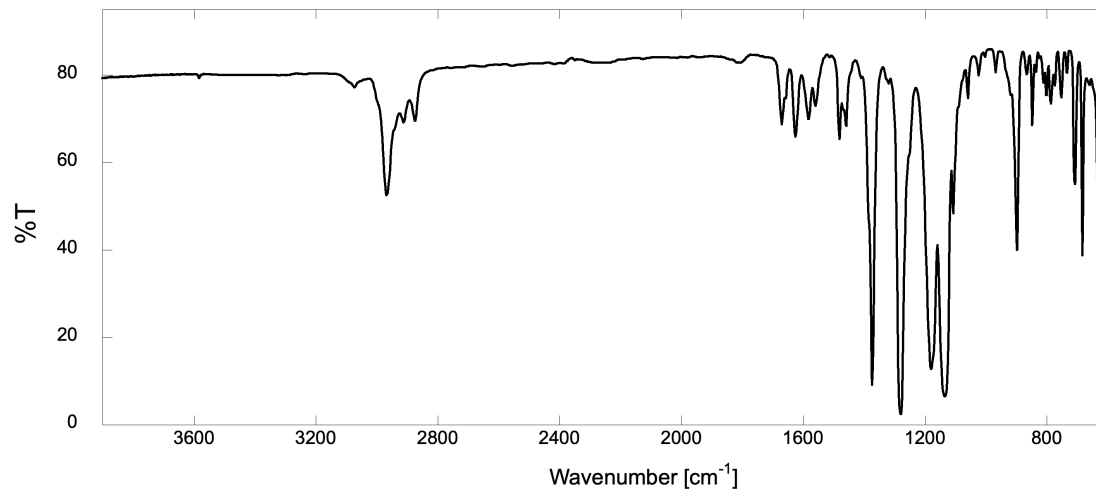**Figure S29.** Infrared spectrum of *trans*- $(\text{CF}_3\text{Tio})_2\text{RuCl}_2$  (ATR)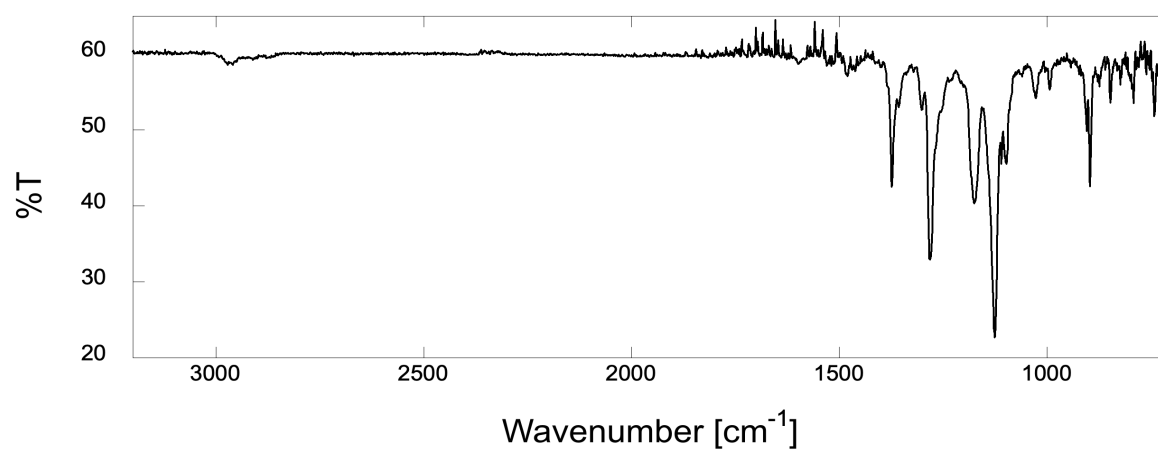**Figure S30.** Infrared spectrum of 80:20 *cis*-/*trans*- $(\text{CF}_3\text{Tio})_2\text{RuCl}_2$  mixture (evapd film)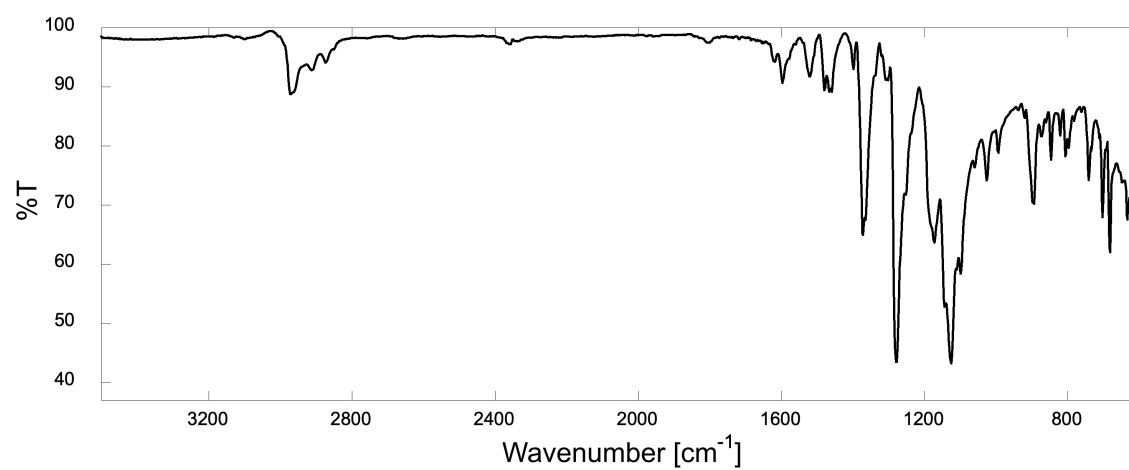

**Figure S31.** Infrared spectrum of  $(\text{Diso})_2\text{Ru}(\text{PPh}_3)$  (nujol mull)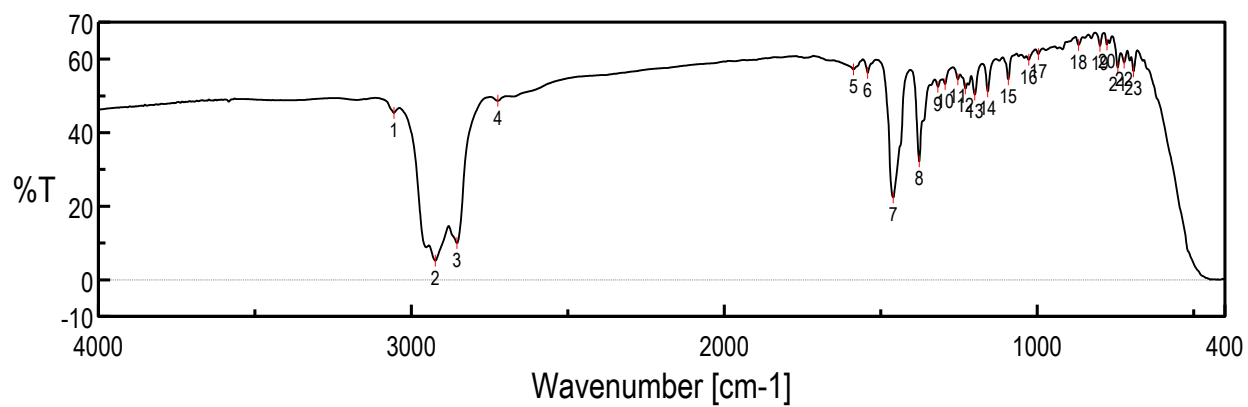**Figure S32.** Infrared spectrum of  $(\text{Diso})_2\text{Os}(\text{PPh}_3)$  (nujol mull)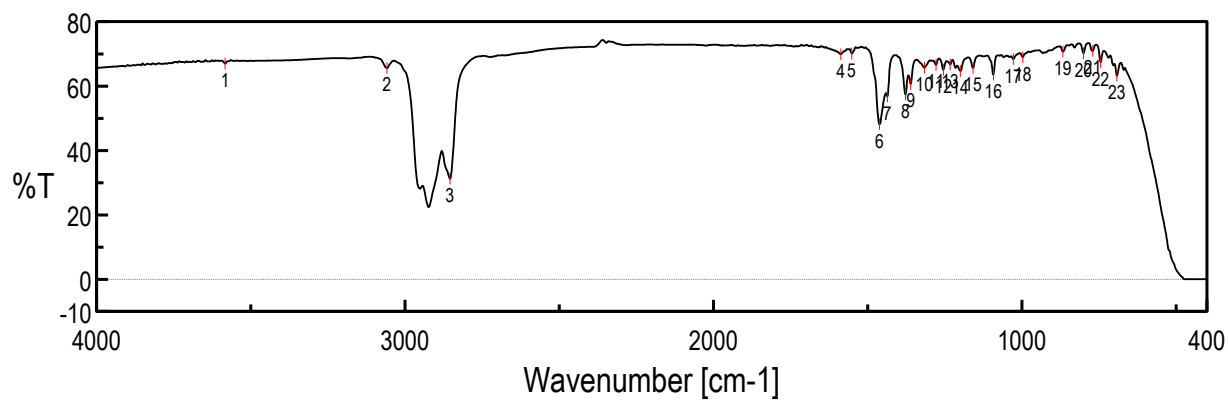

## VIII. Optical Spectra

**Figure S33.** UV-Vis spectrum of *cis*-(Diso)<sub>2</sub>RuCl<sub>2</sub> (CH<sub>2</sub>Cl<sub>2</sub>)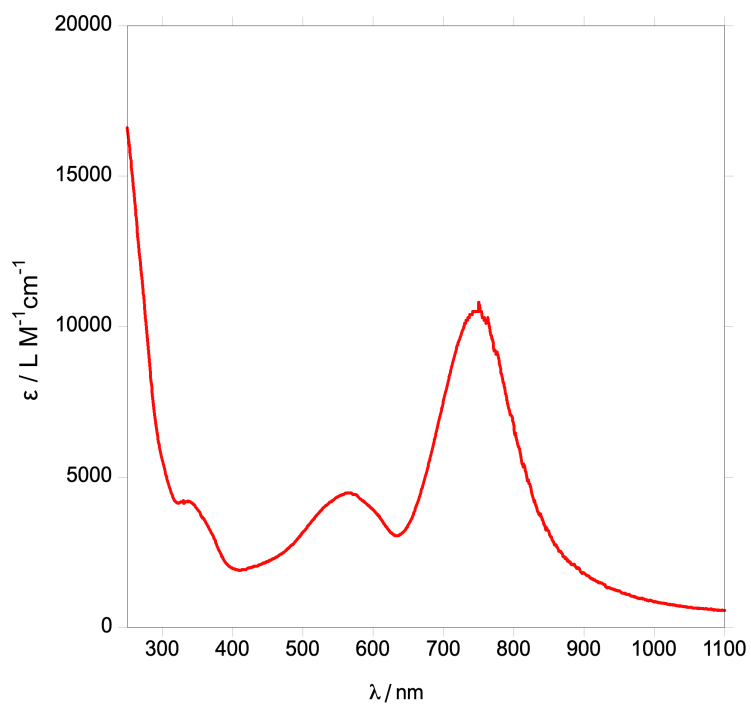**Figure S34.** UV-Vis spectrum of *trans*-(Diso)<sub>2</sub>RuCl<sub>2</sub> (CH<sub>2</sub>Cl<sub>2</sub>)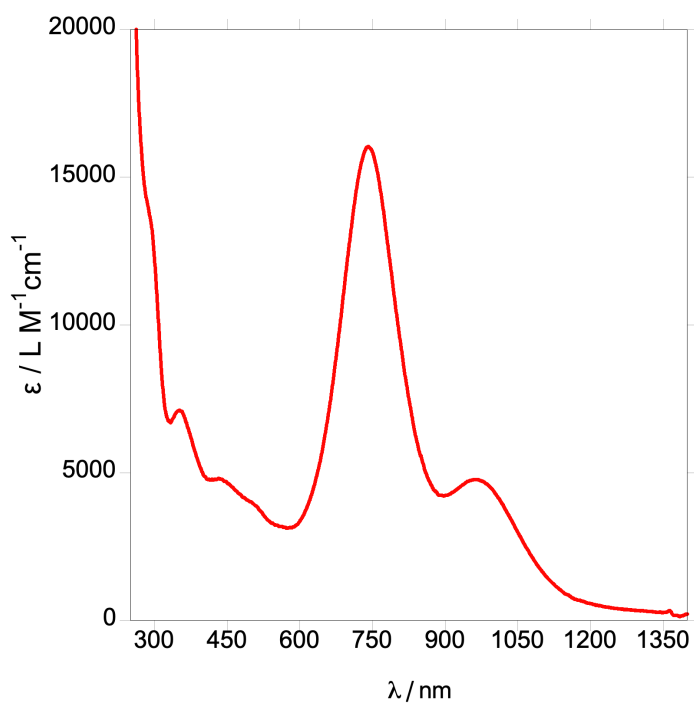

**Figure S35.** UV-Vis spectrum of *cis*-(Diso)<sub>2</sub>OsCl<sub>2</sub> (CH<sub>2</sub>Cl<sub>2</sub>)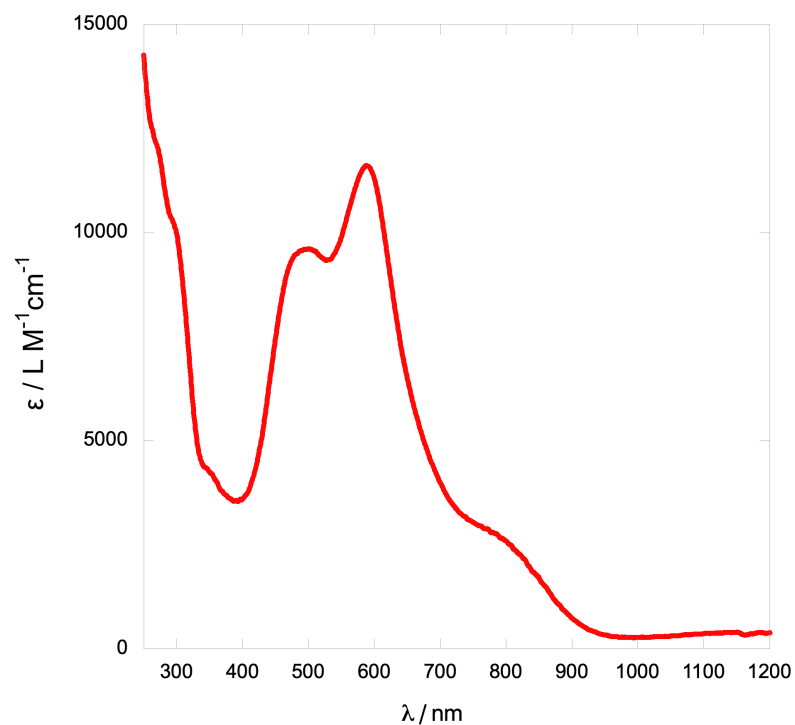**Figure S36.** UV-Vis spectrum of CF<sub>3</sub>Tio (CH<sub>2</sub>Cl<sub>2</sub>)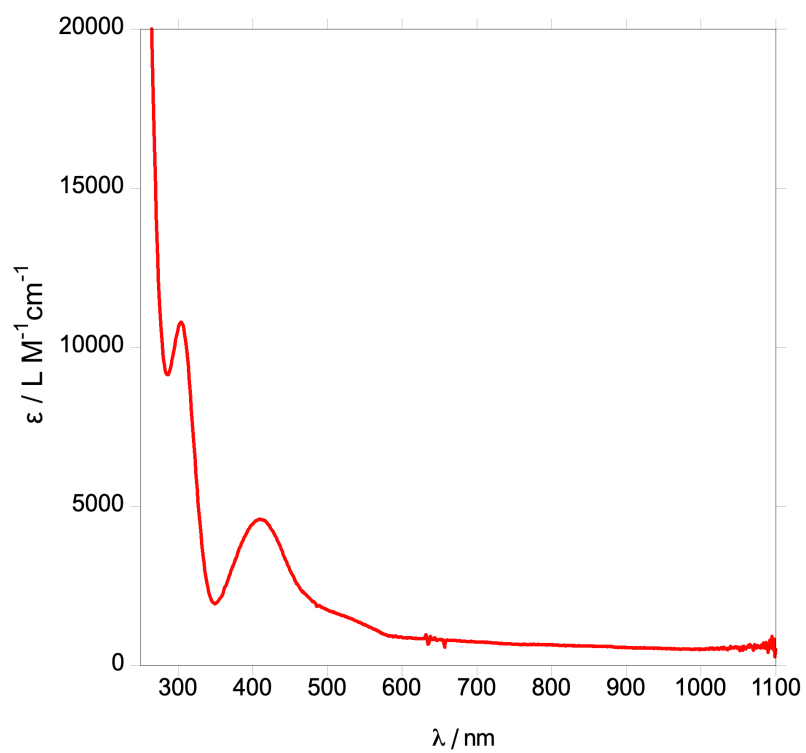

**Figure S37.** UV-Vis-NIR spectrum of *trans*-(CF<sub>3</sub>Tio)<sub>2</sub>RuCl<sub>2</sub>(CH<sub>2</sub>Cl<sub>2</sub>)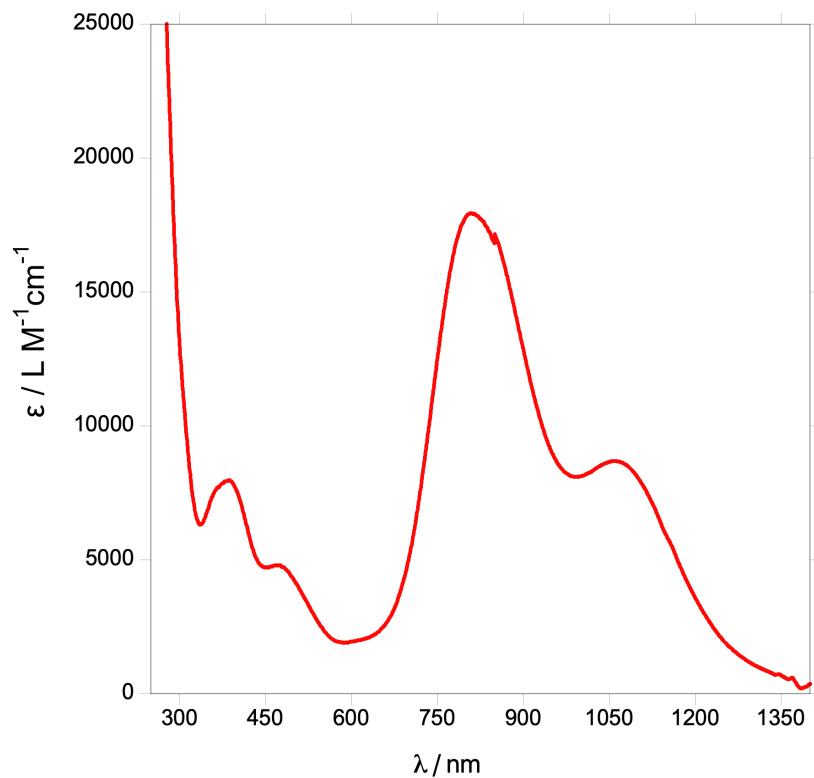**Figure S38.** UV-Vis-NIR spectrum of *cis*- and *trans*-(CF<sub>3</sub>Tio)<sub>2</sub>RuCl<sub>2</sub>(CH<sub>2</sub>Cl<sub>2</sub>)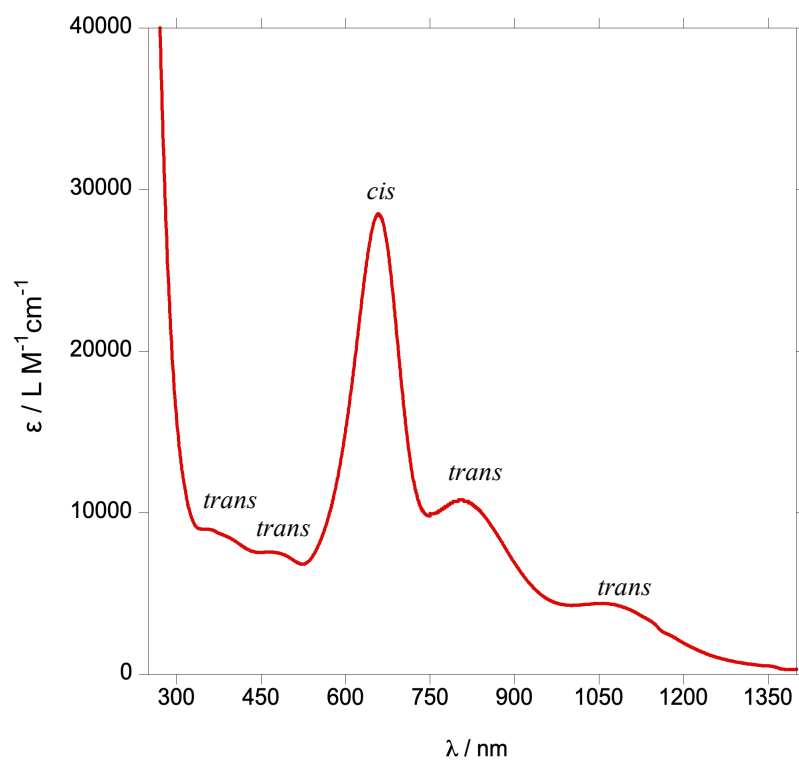

**Figure S39.** UV-Vis spectrum of  $(\text{Diso})_2\text{Ru}(\text{PPh}_3)$  ( $\text{CH}_2\text{Cl}_2$ )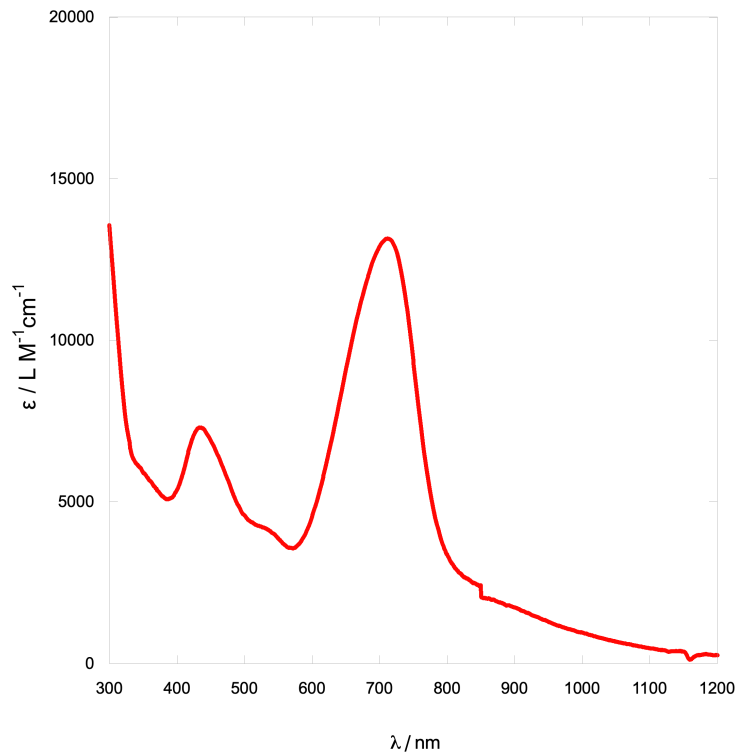**Figure S40.** UV-Vis spectrum of  $(\text{Diso})_2\text{Os}(\text{PPh}_3)$  ( $\text{CH}_2\text{Cl}_2$ )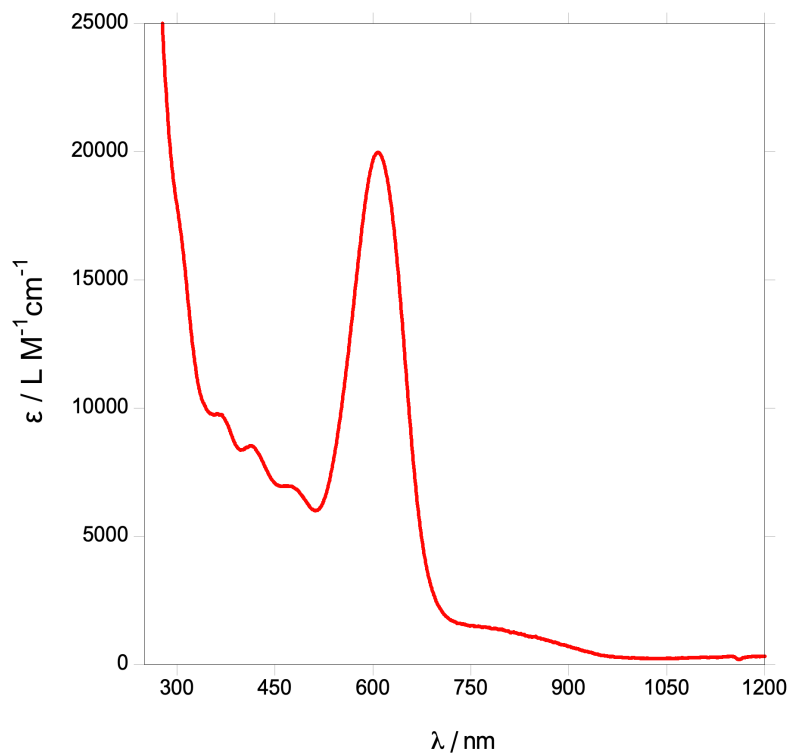

## IX. Cyclic Voltammetry

Figure S41. CV of *cis*-(Diso)<sub>2</sub>RuCl<sub>2</sub>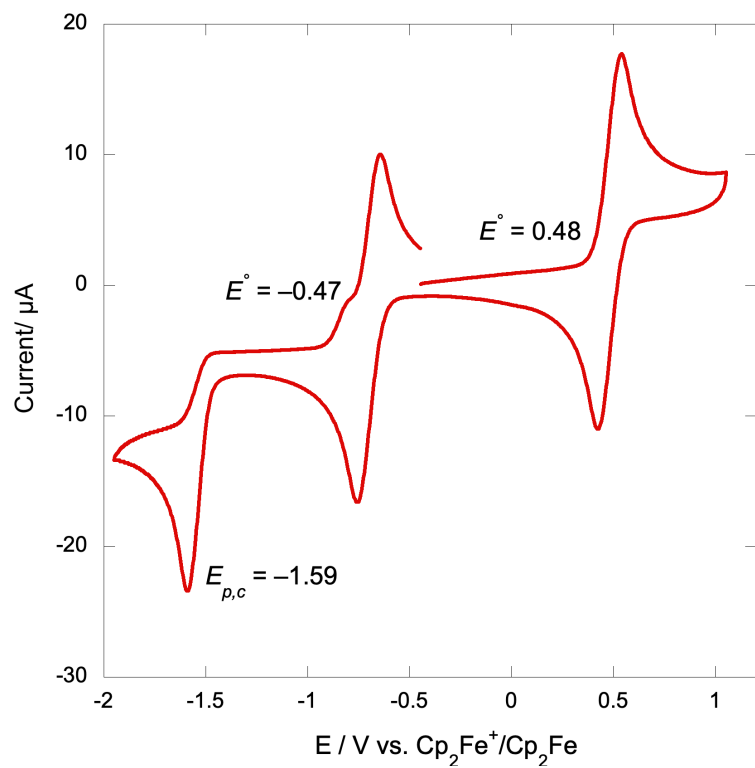Figure S42. CV of *trans*-(Diso)<sub>2</sub>RuCl<sub>2</sub>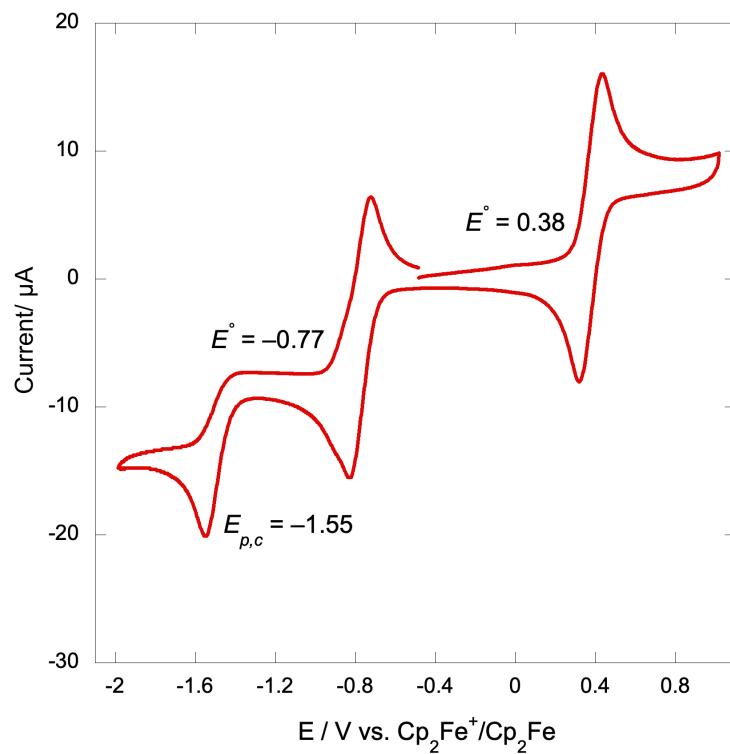



**Figure S43.** CV of *cis*-(Diso)<sub>2</sub>OsCl<sub>2</sub>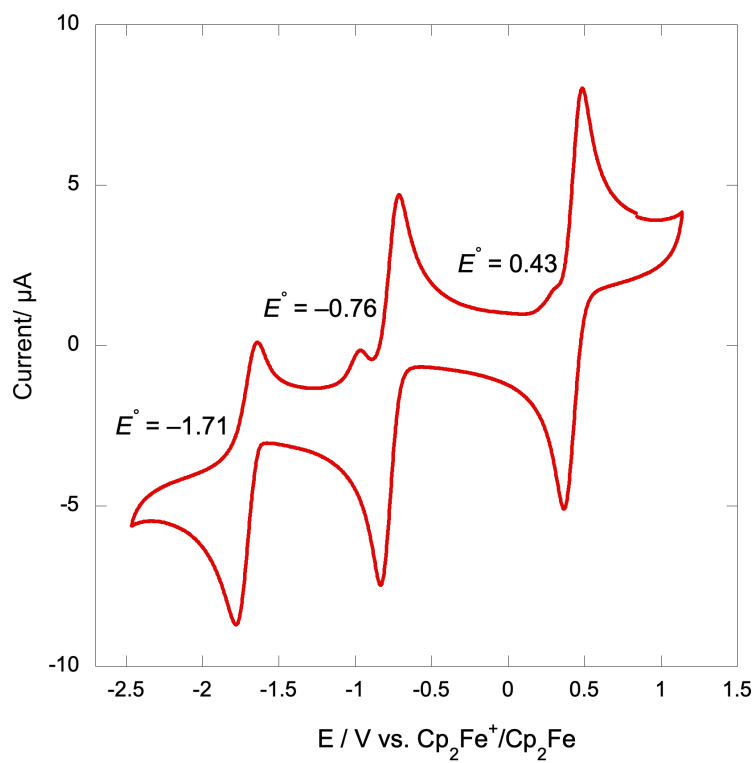**Figure S44.** CV of (Diso)<sub>2</sub>Ru(PPh<sub>3</sub>)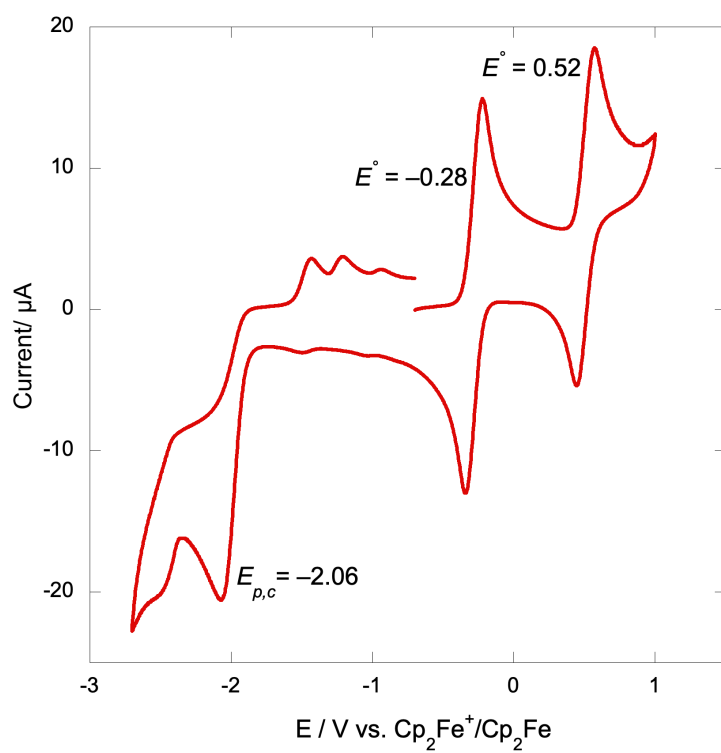

**Figure S45.** CV of  $(\text{Diso})_2\text{Os}(\text{PPh}_3)$ 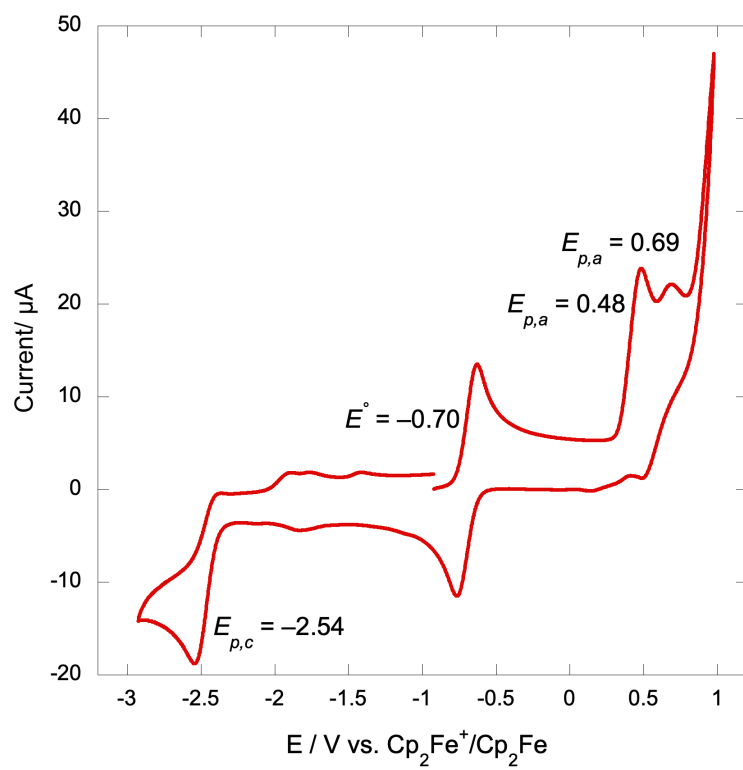

## X. Variable-temperature NMR spectra

**Figure S46.** Variable-temperature  $^1\text{H}$  NMR of *trans*-(Diso) $_2\text{RuCl}_2$  (80:20  $\text{CF}_2\text{Cl}_2$ :  $\text{CDFCl}_2$ , 400 MHz)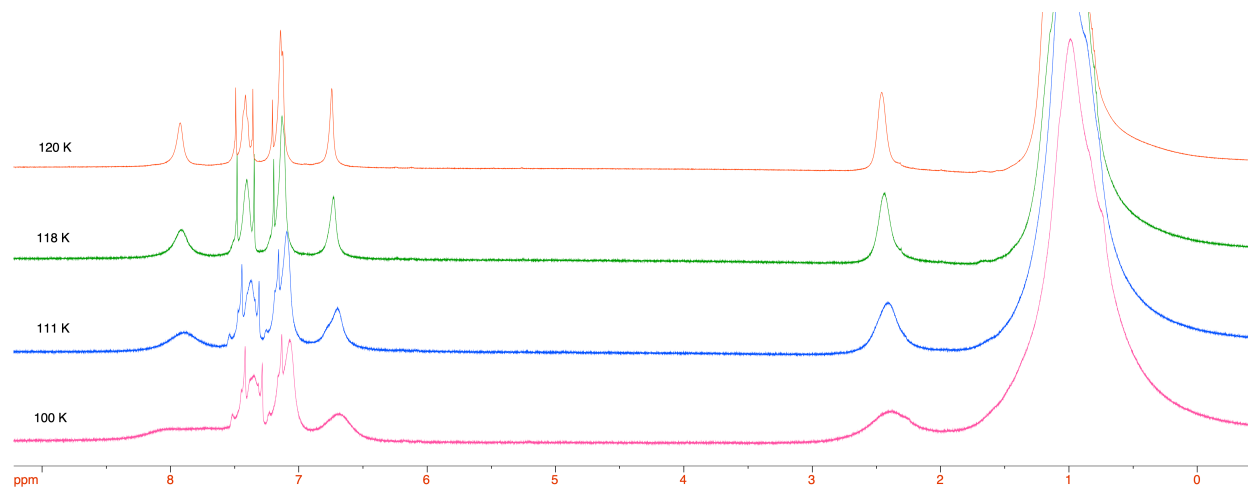**Figure S47.** Variable-temperature  $^1\text{H}$  NMR of *trans*-(Diso) $_2\text{OsCl}_2$  (80:20  $\text{CF}_2\text{Cl}_2$ :  $\text{CDFCl}_2$ , 400 MHz)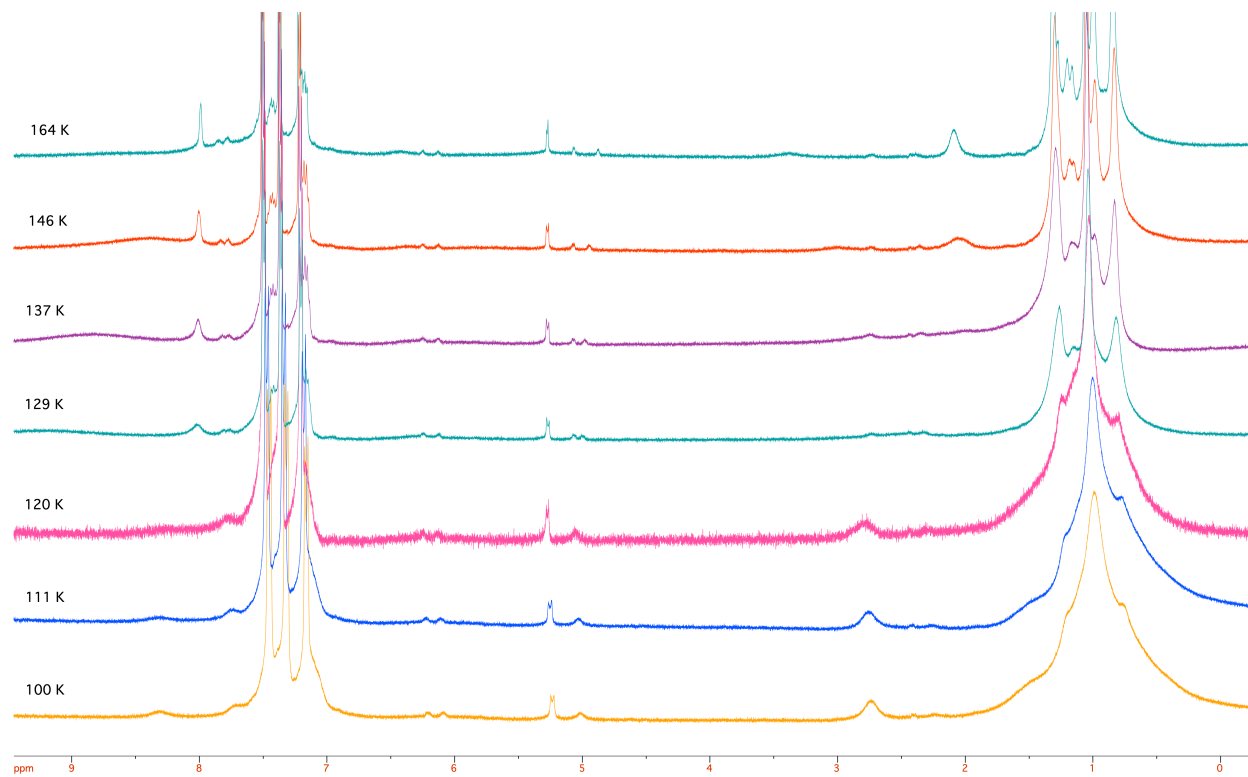

**Figure S48.** Variable-temperature  $^1\text{H}$  NMR of  $(\text{Diso})_2\text{Ru}(\text{PPh}_3)$  (toluene- $d_8$ , 400 MHz)

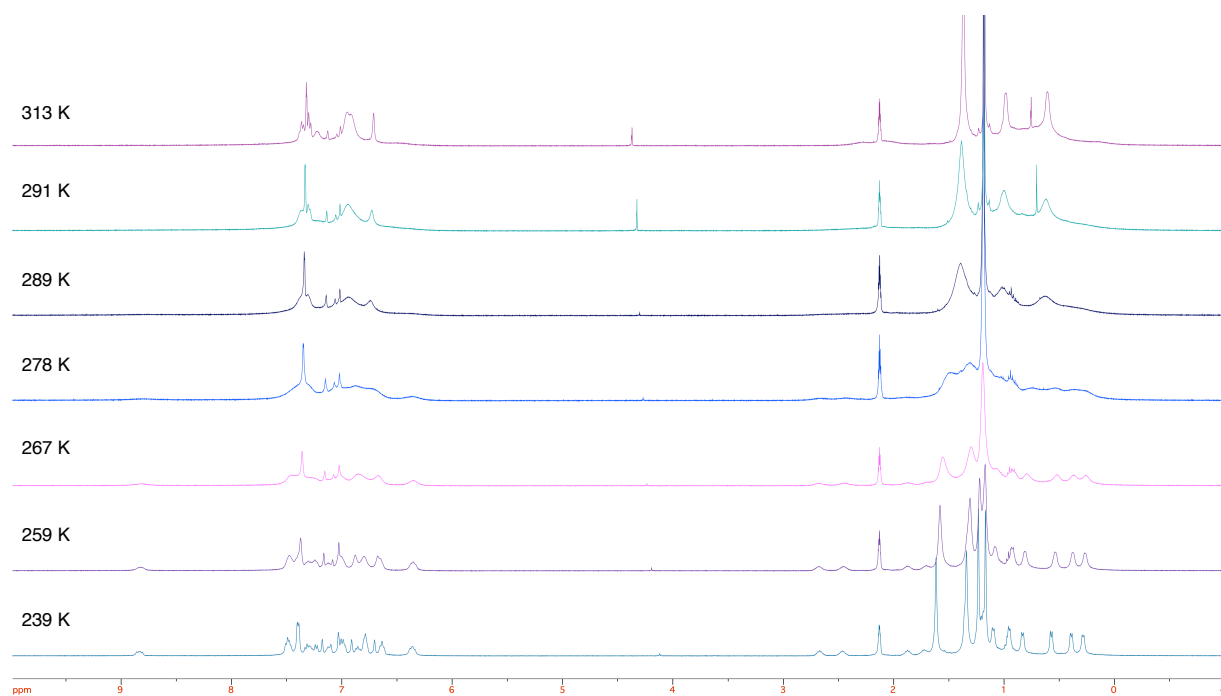

**Figure S49.** Variable-temperature  $^1\text{H}$  NMR of  $(\text{Diso})_2\text{Os}(\text{PPh}_3)$  (toluene- $d_8$ , 400 MHz)

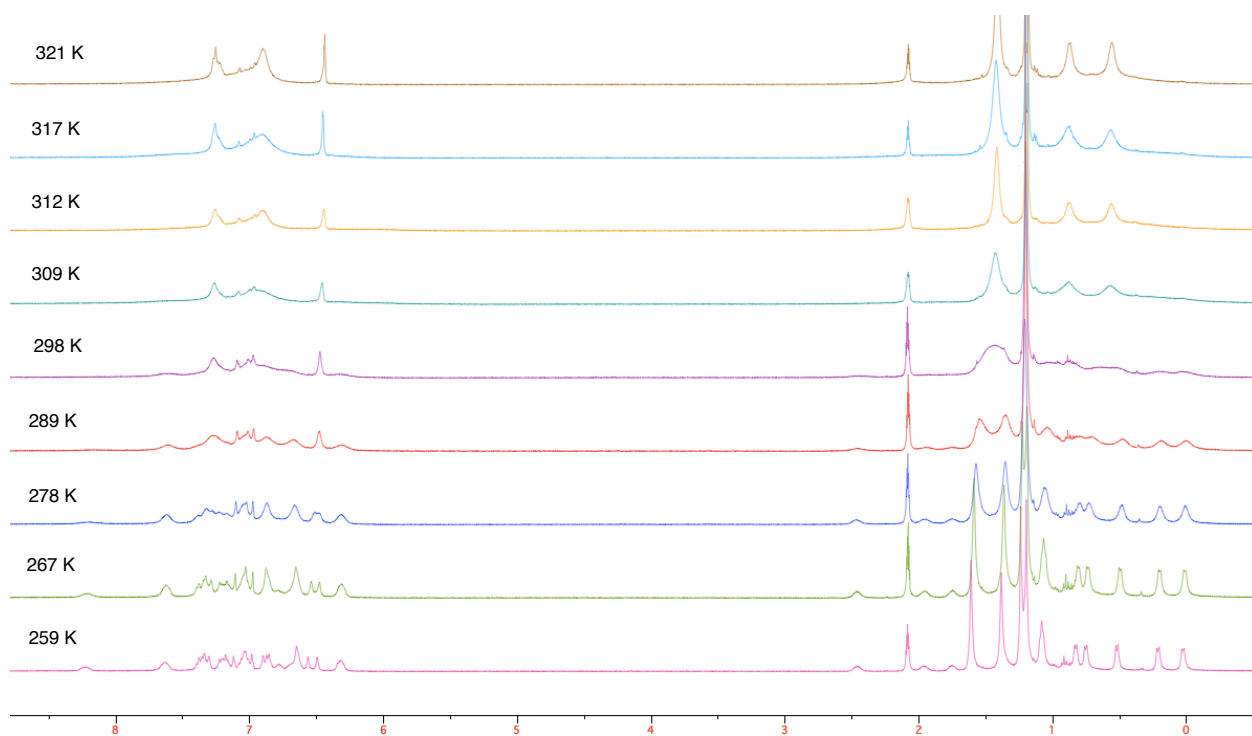

**Figure S50.** Eyring Plot for dynamics in *trans*-(Diso)<sub>2</sub>RuCl<sub>2</sub> (red circles) and *trans*-(Diso)<sub>2</sub>OsCl<sub>2</sub> (blue circles).

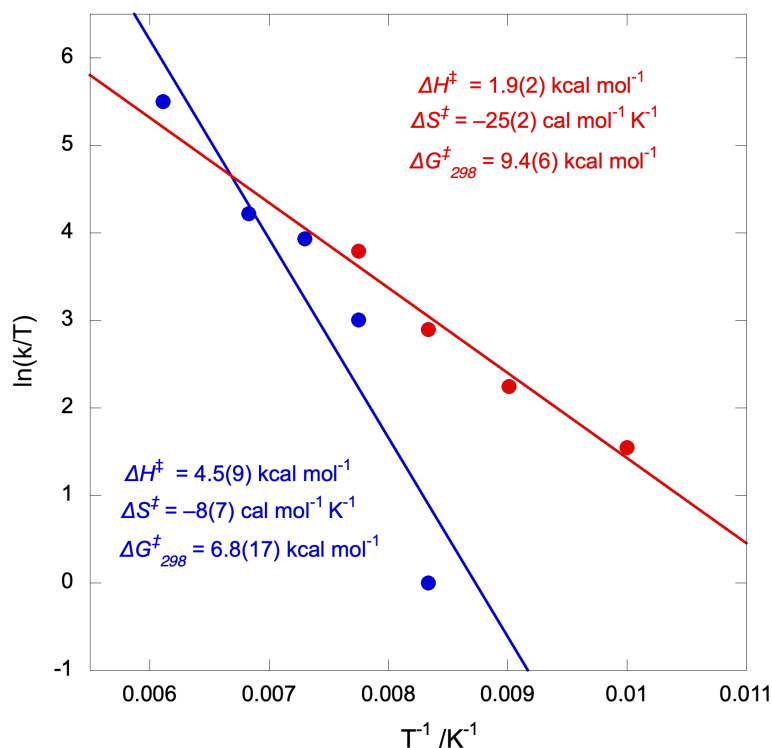

**Figure S51.** Eyring Plot for dynamics in (Diso)<sub>2</sub>Ru(PPh<sub>3</sub>) (red circles) and (Diso)<sub>2</sub>Os(PPh<sub>3</sub>) (blue circles).

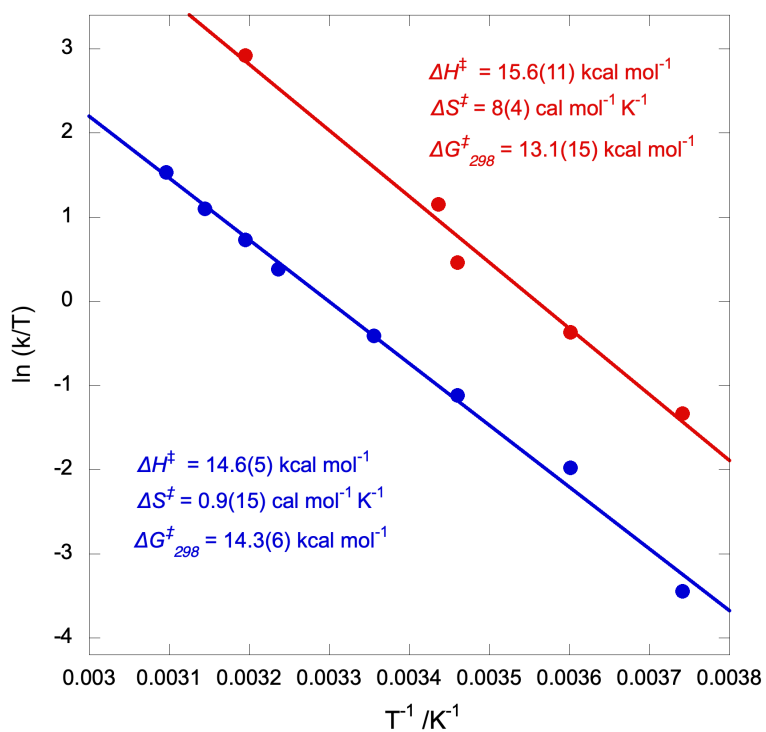

## XI. Energies, average MOS values, and Cartesian Coordinates from DFT Calculations

Note: ap = 1,2-C<sub>6</sub>H<sub>4</sub>(NH)O

### A. *cis-α*-(ap)<sub>2</sub>RuCl<sub>2</sub> [N atoms mutually trans]

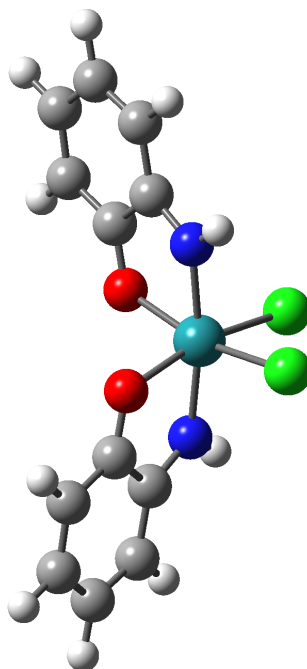

Energy of optimized structure = -1738.65314852 a.u.

MOS = -0.70(6)

Cartesian coordinates of optimized structure:

| Center<br>Number | Atomic<br>Number | Coordinates (Angstroms) |          |           |
|------------------|------------------|-------------------------|----------|-----------|
|                  |                  | X                       | Y        | Z         |
| 1                | 44               | 0.000000                | 0.000000 | 0.597342  |
| 2                | 17               | -1.675248               | 0.139383 | 2.241549  |
| 3                | 8                | 1.513893                | 0.353044 | -0.775836 |
| 4                | 7                | 0.000000                | 1.973027 | 0.442553  |
| 5                | 1                | -0.682442               | 2.566213 | 0.918267  |
| 6                | 6                | 1.772402                | 1.590600 | -0.984832 |
| 7                | 6                | 0.916031                | 2.563096 | -0.315084 |
| 8                | 6                | 1.101701                | 3.962098 | -0.536964 |
| 9                | 1                | 0.455280                | 4.676230 | -0.034299 |
| 10               | 6                | 2.110337                | 4.365158 | -1.370459 |
| 11               | 1                | 2.281234                | 5.422972 | -1.544600 |
| 12               | 6                | 2.959378                | 3.410049 | -2.022295 |
| 13               | 1                | 3.747177                | 3.778369 | -2.673461 |
| 14               | 6                | 2.806216                | 2.057105 | -1.847861 |
| 15               | 1                | 3.444974                | 1.331569 | -2.339973 |

|    |    |           |           |           |
|----|----|-----------|-----------|-----------|
| 16 | 17 | 1.675248  | -0.139383 | 2.241549  |
| 17 | 8  | -1.513893 | -0.353044 | -0.775836 |
| 18 | 7  | -0.000000 | -1.973027 | 0.442553  |
| 19 | 1  | 0.682442  | -2.566213 | 0.918267  |
| 20 | 6  | -1.772402 | -1.590600 | -0.984832 |
| 21 | 6  | -0.916031 | -2.563096 | -0.315084 |
| 22 | 6  | -1.101701 | -3.962098 | -0.536964 |
| 23 | 1  | -0.455280 | -4.676230 | -0.034299 |
| 24 | 6  | -2.110337 | -4.365158 | -1.370459 |
| 25 | 1  | -2.281234 | -5.422972 | -1.544600 |
| 26 | 6  | -2.959378 | -3.410049 | -2.022295 |
| 27 | 1  | -3.747177 | -3.778369 | -2.673461 |
| 28 | 6  | -2.806216 | -2.057105 | -1.847861 |
| 29 | 1  | -3.444974 | -1.331569 | -2.339973 |

---

**B.** *cis- $\alpha$ -(ap)<sub>2</sub>OsCl<sub>2</sub>* [N atoms mutually trans]

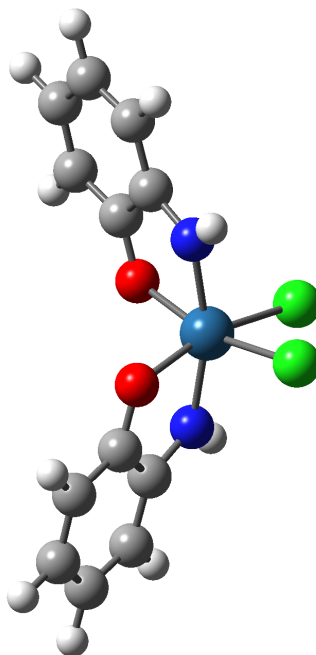

Energy of optimized structure =  $-1734.46454754$  a.u.

MOS =  $-1.01(5)$

Cartesian coordinates of optimized structure:

---

| Center<br>Number | Atomic<br>Number | Coordinates (Angstroms) |           |           |
|------------------|------------------|-------------------------|-----------|-----------|
|                  |                  | X                       | Y         | Z         |
| 1                | 76               | -0.000000               | -0.000000 | 0.589042  |
| 2                | 17               | 0.743455                | 1.485007  | 2.267475  |
| 3                | 8                | -0.234503               | -1.568403 | -0.717917 |
| 4                | 7                | 1.852606                | -0.643368 | 0.313926  |

---

|    |    |           |           |           |
|----|----|-----------|-----------|-----------|
| 5  | 1  | 2.667832  | -0.139690 | 0.667593  |
| 6  | 6  | 0.847230  | -2.220525 | -1.027104 |
| 7  | 6  | 2.075947  | -1.708428 | -0.476127 |
| 8  | 6  | 3.320156  | -2.302230 | -0.812949 |
| 9  | 1  | 4.241556  | -1.902111 | -0.398751 |
| 10 | 6  | 3.319548  | -3.397782 | -1.645587 |
| 11 | 1  | 4.256350  | -3.881974 | -1.903349 |
| 12 | 6  | 2.102039  | -3.915386 | -2.175668 |
| 13 | 1  | 2.143679  | -4.781539 | -2.829919 |
| 14 | 6  | 0.879860  | -3.346511 | -1.883669 |
| 15 | 1  | -0.049879 | -3.730918 | -2.289171 |
| 16 | 17 | -0.743455 | -1.485007 | 2.267475  |
| 17 | 8  | 0.234503  | 1.568403  | -0.717917 |
| 18 | 7  | -1.852606 | 0.643368  | 0.313926  |
| 19 | 1  | -2.667832 | 0.139690  | 0.667593  |
| 20 | 6  | -0.847230 | 2.220525  | -1.027104 |
| 21 | 6  | -2.075947 | 1.708428  | -0.476127 |
| 22 | 6  | -3.320156 | 2.302230  | -0.812949 |
| 23 | 1  | -4.241556 | 1.902111  | -0.398751 |
| 24 | 6  | -3.319548 | 3.397782  | -1.645587 |
| 25 | 1  | -4.256350 | 3.881974  | -1.903349 |
| 26 | 6  | -2.102039 | 3.915386  | -2.175668 |
| 27 | 1  | -2.143679 | 4.781539  | -2.829919 |
| 28 | 6  | -0.879860 | 3.346511  | -1.883669 |
| 29 | 1  | 0.049879  | 3.730918  | -2.289171 |

C. *trans*-(ap)<sub>2</sub>RuCl<sub>2</sub> (minimum-energy, C<sub>s</sub> symmetry)

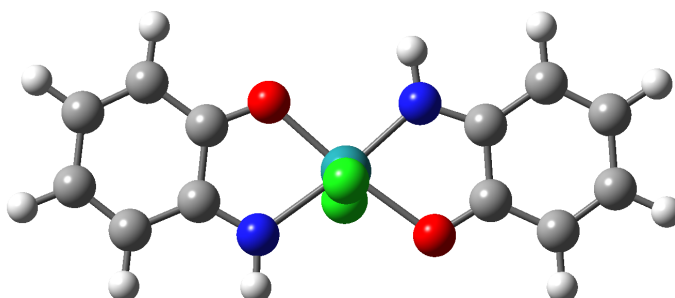

Energy of optimized structure = -1738.64451478 a.u.

avg. MOS = -0.64(6)

Cartesian coordinates of optimized structure:

| Center<br>Number | Atomic<br>Number | Coordinates (Angstroms) |           |           |
|------------------|------------------|-------------------------|-----------|-----------|
|                  |                  | X                       | Y         | Z         |
| 1                | 44               | 0.054891                | 0.007832  | 0.000000  |
| 2                | 17               | 0.439012                | -0.007824 | 2.329495  |
| 3                | 8                | 1.314640                | 1.709321  | 0.000000  |
| 4                | 7                | -1.234057               | 1.447868  | -0.000000 |
| 5                | 1                | -2.245281               | 1.301918  | -0.000000 |



|    |    |           |           |           |
|----|----|-----------|-----------|-----------|
| 6  | 6  | 0.649442  | 2.800588  | 0.000000  |
| 7  | 6  | -0.807298 | 2.711965  | -0.000000 |
| 8  | 6  | -1.610616 | 3.890099  | -0.000000 |
| 9  | 1  | -2.694051 | 3.800371  | -0.000000 |
| 10 | 6  | -0.991045 | 5.111952  | -0.000000 |
| 11 | 1  | -1.580025 | 6.023681  | -0.000000 |
| 12 | 6  | 0.439012  | 5.205933  | -0.000000 |
| 13 | 1  | 0.891595  | 6.193947  | -0.000000 |
| 14 | 6  | 1.247988  | 4.096574  | 0.000000  |
| 15 | 1  | 2.330307  | 4.168287  | 0.000000  |
| 16 | 17 | 0.439012  | -0.007824 | -2.329495 |
| 17 | 8  | -1.279976 | -1.468524 | -0.000000 |
| 18 | 7  | 1.277392  | -1.698987 | 0.000000  |
| 19 | 1  | 2.295295  | -1.746113 | 0.000000  |
| 20 | 6  | -0.833234 | -2.671102 | -0.000000 |
| 21 | 6  | 0.626384  | -2.837099 | 0.000000  |
| 22 | 6  | 1.174025  | -4.166164 | 0.000000  |
| 23 | 1  | 2.252559  | -4.295843 | 0.000000  |
| 24 | 6  | 0.322827  | -5.233716 | 0.000000  |
| 25 | 1  | 0.724083  | -6.242950 | 0.000000  |
| 26 | 6  | -1.106189 | -5.062259 | -0.000000 |
| 27 | 1  | -1.735381 | -5.947281 | -0.000000 |
| 28 | 6  | -1.679169 | -3.818599 | -0.000000 |
| 29 | 1  | -2.754144 | -3.672185 | -0.000000 |

D. *trans*-(ap)<sub>2</sub>RuCl<sub>2</sub> (constrained to C<sub>2</sub> symmetry)

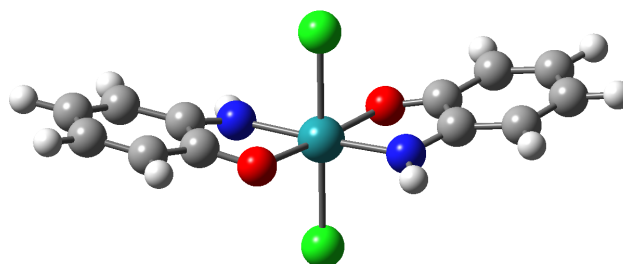

Energy of optimized structure = -1738.63629542 a.u.

\*One imaginary frequency (278.0i cm<sup>-1</sup>)

MOS = -0.49(6)

Cartesian coordinates of optimized structure:

| Center<br>Number | Atomic<br>Number | Coordinates (Angstroms) |           |           |
|------------------|------------------|-------------------------|-----------|-----------|
|                  |                  | X                       | Y         | Z         |
| 1                | 44               | 0.000000                | 0.000000  | 0.000000  |
| 2                | 17               | 0.000000                | 0.000000  | 2.408896  |
| 3                | 8                | -2.064803               | 0.000000  | -0.069604 |
| 4                | 7                | -0.410458               | -1.958519 | -0.047710 |
| 5                | 1                | 0.250843                | -2.719085 | 0.114471  |
| 6                | 6                | -2.561641               | -1.134851 | -0.350720 |
| 7                | 6                | -1.650162               | -2.295774 | -0.335764 |
| 8                | 6                | -2.171662               | -3.615950 | -0.543354 |

|    |    |           |           |           |
|----|----|-----------|-----------|-----------|
| 9  | 1  | -1.493790 | -4.464954 | -0.527046 |
| 10 | 6  | -3.507579 | -3.767750 | -0.775340 |
| 11 | 1  | -3.921335 | -4.756869 | -0.945631 |
| 12 | 6  | -4.396705 | -2.632970 | -0.801094 |
| 13 | 1  | -5.451695 | -2.811084 | -0.989378 |
| 14 | 6  | -3.955523 | -1.355754 | -0.592293 |
| 15 | 1  | -4.620986 | -0.499361 | -0.603858 |
| 16 | 17 | 0.000000  | 0.000000  | -2.410412 |
| 17 | 8  | 2.064803  | 0.000000  | -0.069604 |
| 18 | 7  | 0.410458  | 1.958519  | -0.047710 |
| 19 | 1  | -0.250843 | 2.719085  | 0.114471  |
| 20 | 6  | 2.561641  | 1.134851  | -0.350720 |
| 21 | 6  | 1.650162  | 2.295774  | -0.335764 |
| 22 | 6  | 2.171662  | 3.615950  | -0.543354 |
| 23 | 1  | 1.493790  | 4.464954  | -0.527046 |
| 24 | 6  | 3.507579  | 3.767750  | -0.775340 |
| 25 | 1  | 3.921335  | 4.756869  | -0.945631 |
| 26 | 6  | 4.396705  | 2.632970  | -0.801094 |
| 27 | 1  | 5.451695  | 2.811084  | -0.989378 |
| 28 | 6  | 3.955523  | 1.355754  | -0.592293 |
| 29 | 1  | 4.620986  | 0.499361  | -0.603858 |

---

E. *trans*-(ap)<sub>2</sub>RuCl<sub>2</sub> (constrained to C<sub>2h</sub> or C<sub>i</sub> symmetry)

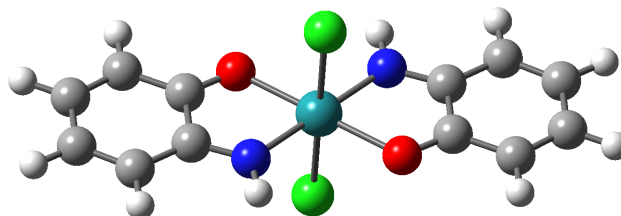

Energy of optimized structure = -1738.63511520 a.u.

\*One imaginary frequency (52.3i cm<sup>-1</sup>)

MOS = -0.42(6)

Cartesian coordinates of optimized structure:

---

| Center<br>Number | Atomic<br>Number | Coordinates (Angstroms) |          |           |
|------------------|------------------|-------------------------|----------|-----------|
|                  |                  | X                       | Y        | Z         |
| 1                | 44               | 0.000000                | 0.000000 | 0.000000  |
| 2                | 17               | -0.000000               | 0.000000 | 2.410937  |
| 3                | 8                | 1.076278                | 1.785888 | -0.000000 |
| 4                | 7                | -1.468001               | 1.367626 | 0.000000  |
| 5                | 1                | -2.470680               | 1.172839 | 0.000000  |
| 6                | 6                | 0.350856                | 2.822126 | 0.000000  |
| 7                | 6                | -1.117291               | 2.633661 | 0.000000  |
| 8                | 6                | -1.984853               | 3.778155 | 0.000000  |
| 9                | 1                | -3.061231               | 3.629205 | 0.000000  |
| 10               | 6                | -1.432185               | 5.024266 | 0.000000  |

|    |    |           |           |           |
|----|----|-----------|-----------|-----------|
| 11 | 1  | -2.069717 | 5.902988  | 0.000000  |
| 12 | 6  | 0.000000  | 5.209834  | 0.000000  |
| 13 | 1  | 0.385140  | 6.225699  | 0.000000  |
| 14 | 6  | 0.872181  | 4.158617  | 0.000000  |
| 15 | 1  | 1.948506  | 4.292546  | 0.000000  |
| 16 | 17 | -0.000000 | 0.000000  | -2.410937 |
| 17 | 8  | -1.076278 | -1.785888 | -0.000000 |
| 18 | 7  | 1.468001  | -1.367626 | 0.000000  |
| 19 | 1  | 2.470680  | -1.172839 | 0.000000  |
| 20 | 6  | -0.350856 | -2.822126 | 0.000000  |
| 21 | 6  | 1.117291  | -2.633661 | 0.000000  |
| 22 | 6  | 1.984853  | -3.778155 | 0.000000  |
| 23 | 1  | 3.061231  | -3.629205 | 0.000000  |
| 24 | 6  | 1.432185  | -5.024266 | 0.000000  |
| 25 | 1  | 2.069717  | -5.902988 | 0.000000  |
| 26 | 6  | -0.000000 | -5.209834 | 0.000000  |
| 27 | 1  | -0.385140 | -6.225699 | 0.000000  |
| 28 | 6  | -0.872181 | -4.158617 | 0.000000  |
| 29 | 1  | -1.948506 | -4.292546 | 0.000000  |

---

F. *trans*-(ap)<sub>2</sub>OsCl<sub>2</sub> (minimum-energy, C<sub>s</sub> symmetry)

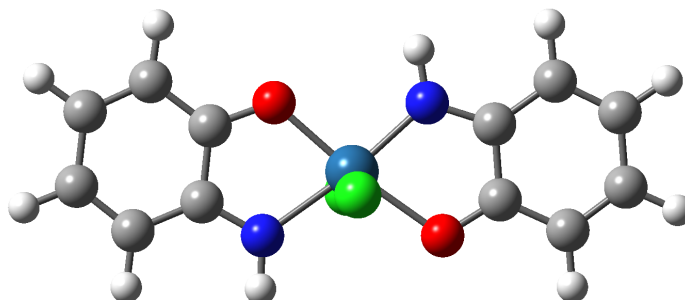

Energy of optimized structure = -1734.45102859 a.u.

avg. MOS = -0.90(6)

Cartesian coordinates of optimized structure:

| Center<br>Number | Atomic<br>Number | Coordinates (Angstroms) |          |           |
|------------------|------------------|-------------------------|----------|-----------|
|                  |                  | X                       | Y        | Z         |
| 1                | 76               | 0.052996                | 0.000672 | 0.000000  |
| 2                | 17               | 0.473535                | 0.005608 | 2.318048  |
| 3                | 8                | 1.316381                | 1.701183 | 0.000000  |
| 4                | 7                | -1.223422               | 1.466272 | -0.000000 |
| 5                | 1                | -2.235653               | 1.329735 | -0.000000 |
| 6                | 6                | 0.658636                | 2.815176 | -0.000000 |
| 7                | 6                | -0.785536               | 2.743006 | -0.000000 |
| 8                | 6                | -1.578848               | 3.918734 | -0.000000 |
| 9                | 1                | -2.663131               | 3.837590 | -0.000000 |
| 10               | 6                | -0.949343               | 5.141914 | -0.000000 |
| 11               | 1                | -1.532916               | 6.057026 | -0.000000 |

|    |    |           |           |           |
|----|----|-----------|-----------|-----------|
| 12 | 6  | 0.473535  | 5.219544  | -0.000000 |
| 13 | 1  | 0.941101  | 6.200575  | -0.000000 |
| 14 | 6  | 1.271656  | 4.094502  | -0.000000 |
| 15 | 1  | 2.354684  | 4.155794  | 0.000000  |
| 16 | 17 | 0.473535  | 0.005608  | -2.318048 |
| 17 | 8  | -1.297720 | -1.456916 | -0.000000 |
| 18 | 7  | 1.232729  | -1.736947 | 0.000000  |
| 19 | 1  | 2.248530  | -1.799450 | 0.000000  |
| 20 | 6  | -0.882004 | -2.689674 | 0.000000  |
| 21 | 6  | 0.559354  | -2.876981 | 0.000000  |
| 22 | 6  | 1.079858  | -4.208317 | 0.000000  |
| 23 | 1  | 2.155266  | -4.362083 | 0.000000  |
| 24 | 6  | 0.204236  | -5.264079 | 0.000000  |
| 25 | 1  | 0.590033  | -6.279514 | 0.000000  |
| 26 | 6  | -1.213524 | -5.067785 | 0.000000  |
| 27 | 1  | -1.864058 | -5.936965 | 0.000000  |
| 28 | 6  | -1.756146 | -3.804704 | -0.000000 |
| 29 | 1  | -2.827395 | -3.631907 | -0.000000 |

---

**G. *trans*-(ap)<sub>2</sub>OsCl<sub>2</sub> (constrained to C<sub>2</sub> symmetry)**

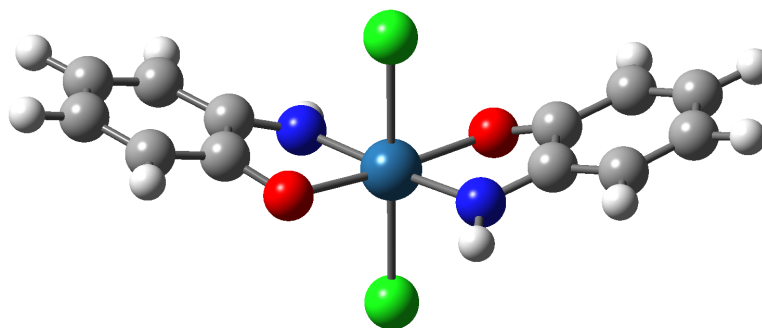

Energy of optimized structure = -1734.43812416 a.u.

avg. MOS = -0.73(6)

Cartesian coordinates of optimized structure:

| Center<br>Number | Atomic<br>Number | Coordinates (Angstroms) |          |           |
|------------------|------------------|-------------------------|----------|-----------|
|                  |                  | X                       | Y        | Z         |
| 1                | 76               | 0.000000                | 0.000000 | 0.314431  |
| 2                | 17               | 0.000000                | 0.000000 | 2.735336  |
| 3                | 8                | 1.033860                | 1.768954 | 0.216376  |
| 4                | 7                | -1.466200               | 1.368786 | 0.255994  |
| 5                | 1                | -2.437059               | 1.221948 | 0.530507  |
| 6                | 6                | 0.326713                | 2.760842 | -0.198901 |
| 7                | 6                | -1.125214               | 2.582146 | -0.169629 |
| 8                | 6                | -1.984857               | 3.682647 | -0.464588 |
| 9                | 1                | -3.062046               | 3.544074 | -0.436035 |
| 10               | 6                | -1.423803               | 4.884243 | -0.805628 |
| 11               | 1                | -2.059517               | 5.729667 | -1.049994 |
| 12               | 6                | -0.000000               | 5.053594 | -0.849502 |

|    |    |           |           |           |
|----|----|-----------|-----------|-----------|
| 13 | 1  | 0.397736  | 6.026437  | -1.124005 |
| 14 | 6  | 0.864245  | 4.031025  | -0.548418 |
| 15 | 1  | 1.941498  | 4.155523  | -0.568231 |
| 16 | 17 | -0.000000 | -0.000000 | -2.100464 |
| 17 | 8  | -1.033860 | -1.768954 | 0.216376  |
| 18 | 7  | 1.466200  | -1.368786 | 0.255994  |
| 19 | 1  | 2.437059  | -1.221948 | 0.530507  |
| 20 | 6  | -0.326713 | -2.760842 | -0.198901 |
| 21 | 6  | 1.125214  | -2.582146 | -0.169629 |
| 22 | 6  | 1.984857  | -3.682647 | -0.464588 |
| 23 | 1  | 3.062046  | -3.544074 | -0.436035 |
| 24 | 6  | 1.423803  | -4.884243 | -0.805628 |
| 25 | 1  | 2.059517  | -5.729667 | -1.049994 |
| 26 | 6  | -0.000000 | -5.053594 | -0.849502 |
| 27 | 1  | -0.397736 | -6.026437 | -1.124005 |
| 28 | 6  | -0.864245 | -4.031025 | -0.548418 |
| 29 | 1  | -1.941498 | -4.155523 | -0.568231 |

---

#### H. *trans*-(ap)<sub>2</sub>OsCl<sub>2</sub> (constrained to C<sub>2h</sub> symmetry)

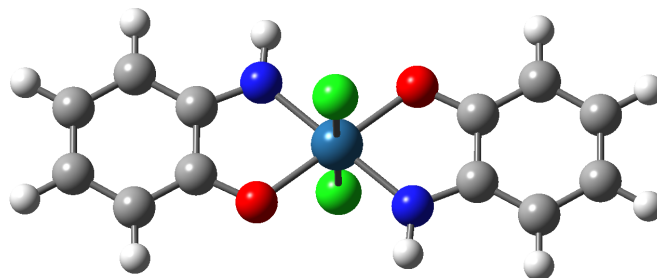

Energy of optimized structure = -1734.42952511 a.u.

MOS = -1.51(9)

Cartesian coordinates of optimized structure:

| Center<br>Number | Atomic<br>Number | Coordinates (Angstroms) |           |           |
|------------------|------------------|-------------------------|-----------|-----------|
|                  |                  | X                       | Y         | Z         |
| 1                | 76               | 0.000000                | 0.000000  | 0.000000  |
| 2                | 17               | -0.000000               | -0.000000 | 2.366569  |
| 3                | 8                | 1.031835                | 1.704196  | -0.000000 |
| 4                | 7                | -1.484769               | 1.321945  | -0.000000 |
| 5                | 1                | -2.481205               | 1.115521  | 0.000000  |
| 6                | 6                | 0.297497                | 2.816656  | -0.000000 |
| 7                | 6                | -1.121744               | 2.639522  | -0.000000 |
| 8                | 6                | -1.963263               | 3.762169  | -0.000000 |
| 9                | 1                | -3.042321               | 3.632489  | -0.000000 |
| 10               | 6                | -1.394196               | 5.036274  | -0.000000 |
| 11               | 1                | -2.039842               | 5.909301  | -0.000000 |
| 12               | 6                | 0.000000                | 5.203732  | -0.000000 |
| 13               | 1                | 0.420205                | 6.204891  | -0.000000 |
| 14               | 6                | 0.854161                | 4.098597  | -0.000000 |

|    |    |           |           |           |
|----|----|-----------|-----------|-----------|
| 15 | 1  | 1.933711  | 4.208490  | -0.000000 |
| 16 | 17 | -0.000000 | -0.000000 | -2.366569 |
| 17 | 8  | -1.031835 | -1.704196 | -0.000000 |
| 18 | 7  | 1.484769  | -1.321945 | -0.000000 |
| 19 | 1  | 2.481205  | -1.115521 | 0.000000  |
| 20 | 6  | -0.297497 | -2.816656 | -0.000000 |
| 21 | 6  | 1.121744  | -2.639522 | -0.000000 |
| 22 | 6  | 1.963263  | -3.762169 | -0.000000 |
| 23 | 1  | 3.042321  | -3.632489 | -0.000000 |
| 24 | 6  | 1.394196  | -5.036274 | -0.000000 |
| 25 | 1  | 2.039842  | -5.909301 | -0.000000 |
| 26 | 6  | -0.000000 | -5.203732 | -0.000000 |
| 27 | 1  | -0.420205 | -6.204891 | -0.000000 |
| 28 | 6  | -0.854161 | -4.098597 | -0.000000 |
| 29 | 1  | -1.933711 | -4.208490 | -0.000000 |

---

### I. (ap)<sub>2</sub>Ru(PMe<sub>3</sub>)

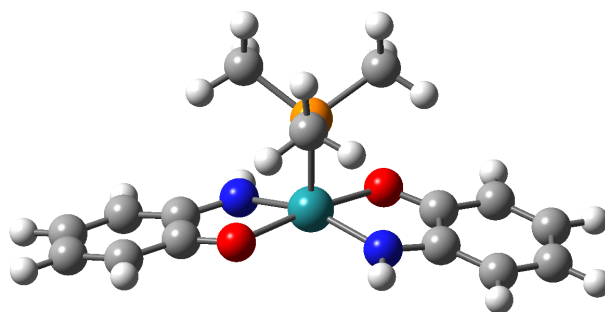

Energy of optimized structure = -1279.35386162 a.u.

avg. MOS = -1.27(5)

Cartesian coordinates of optimized structure:

---

| Center<br>Number | Atomic<br>Number | Coordinates (Angstroms) |           |           |
|------------------|------------------|-------------------------|-----------|-----------|
|                  |                  | X                       | Y         | Z         |
| 1                | 44               | 0.011386                | -0.275944 | 0.005788  |
| 2                | 8                | -1.608380               | -0.161238 | 1.310756  |
| 3                | 7                | -1.455268               | -0.863742 | -1.150265 |
| 4                | 1                | -1.367852               | -1.215265 | -2.104349 |
| 5                | 6                | -2.748364               | -0.511410 | 0.759500  |
| 6                | 6                | -2.710216               | -0.942784 | -0.608736 |
| 7                | 6                | -3.886909               | -1.385062 | -1.250295 |
| 8                | 6                | -5.086609               | -1.375640 | -0.557095 |
| 9                | 1                | -5.997755               | -1.709672 | -1.045096 |
| 10               | 6                | -5.131296               | -0.932174 | 0.783702  |
| 11               | 6                | -3.986276               | -0.502575 | 1.439005  |
| 12               | 1                | -4.012423               | -0.174742 | 2.474355  |
| 13               | 15               | -0.025307               | 1.971504  | -0.199888 |
| 14               | 6                | -1.448028               | 2.614367  | -1.177098 |
| 15               | 1                | -1.463715               | 3.710165  | -1.171062 |

---

|    |   |           |           |           |
|----|---|-----------|-----------|-----------|
| 16 | 1 | -1.371008 | 2.255116  | -2.206933 |
| 17 | 1 | -2.380984 | 2.235066  | -0.750220 |
| 18 | 6 | 1.455527  | 2.699795  | -1.013961 |
| 19 | 1 | 1.388893  | 3.793081  | -1.048734 |
| 20 | 1 | 2.354315  | 2.407776  | -0.462748 |
| 21 | 1 | 1.539144  | 2.301773  | -2.028908 |
| 22 | 6 | -0.159515 | 2.873953  | 1.401622  |
| 23 | 1 | -0.276662 | 3.952357  | 1.244867  |
| 24 | 1 | -1.019764 | 2.480887  | 1.950061  |
| 25 | 1 | 0.740823  | 2.690366  | 1.995266  |
| 26 | 1 | -3.840186 | -1.723448 | -2.283769 |
| 27 | 1 | -6.080774 | -0.934096 | 1.312940  |
| 28 | 8 | 1.599059  | -0.667548 | -1.256667 |
| 29 | 7 | 1.504140  | -0.367601 | 1.284012  |
| 30 | 1 | 1.444874  | -0.308840 | 2.301146  |
| 31 | 6 | 2.752535  | -0.780652 | -0.641565 |
| 32 | 6 | 2.748971  | -0.637195 | 0.787231  |
| 33 | 6 | 3.946495  | -0.782368 | 1.521902  |
| 34 | 6 | 5.128744  | -1.046930 | 0.851124  |
| 35 | 1 | 6.054929  | -1.157726 | 1.407766  |
| 36 | 6 | 5.137866  | -1.174868 | -0.557111 |
| 37 | 6 | 3.974266  | -1.043894 | -1.299852 |
| 38 | 1 | 3.973101  | -1.151324 | -2.380735 |
| 39 | 1 | 3.927190  | -0.684342 | 2.605828  |
| 40 | 1 | 6.075772  | -1.383865 | -1.065219 |

**J. (ap)<sub>2</sub>Ru(PMe<sub>3</sub>) (with (ap)<sub>2</sub>Ru(P) fragment constrained to C<sub>2</sub> symmetry)**

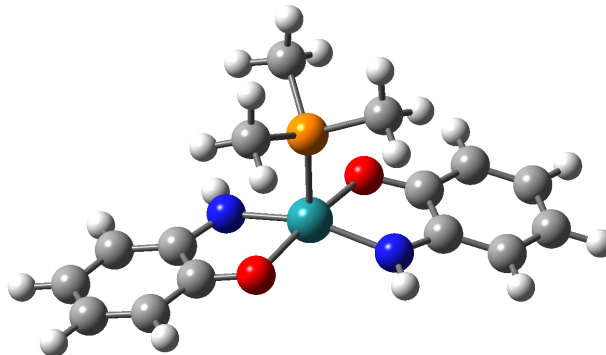

Energy of optimized structure = -1279.35345260 a.u.

MOS = -1.27(5)

Cartesian coordinates of optimized structure:

| Center<br>Number | Atomic<br>Number | Coordinates (Angstroms) |           |           |
|------------------|------------------|-------------------------|-----------|-----------|
|                  |                  | X                       | Y         | Z         |
| 1                | 44               | 0.001653                | -0.268797 | -0.000400 |
| 2                | 15               | 0.000392                | 1.990368  | -0.007834 |
| 3                | 6                | 1.474149                | 2.764723  | -0.791196 |
| 4                | 1                | 1.420961                | 3.857600  | -0.731387 |
| 5                | 1                | 1.530882                | 2.450872  | -1.836726 |

|    |   |           |           |           |
|----|---|-----------|-----------|-----------|
| 6  | 1 | 2.380379  | 2.415954  | -0.287491 |
| 7  | 6 | -0.073929 | 2.753420  | 1.669565  |
| 8  | 1 | -0.144811 | 3.845727  | 1.609946  |
| 9  | 1 | 0.824415  | 2.478557  | 2.229919  |
| 10 | 1 | -0.943693 | 2.354615  | 2.199203  |
| 11 | 6 | -1.432357 | 2.749479  | -0.882689 |
| 12 | 1 | -1.422936 | 3.839853  | -0.773379 |
| 13 | 1 | -2.363429 | 2.350413  | -0.470067 |
| 14 | 1 | -1.388230 | 2.488253  | -1.943536 |
| 15 | 8 | 1.604953  | -0.415562 | -1.308678 |
| 16 | 7 | 1.479781  | -0.616532 | 1.242448  |
| 17 | 1 | 1.405520  | -0.766230 | 2.249260  |
| 18 | 6 | 2.750427  | -0.651826 | -0.713257 |
| 19 | 6 | 2.728991  | -0.797337 | 0.715034  |
| 20 | 6 | 3.914810  | -1.099218 | 1.419436  |
| 21 | 1 | 3.881074  | -1.221126 | 2.500553  |
| 22 | 6 | 5.105417  | -1.231733 | 0.724111  |
| 23 | 1 | 6.023163  | -1.459997 | 1.258506  |
| 24 | 6 | 5.133203  | -1.071296 | -0.680094 |
| 25 | 1 | 6.076664  | -1.180916 | -1.208710 |
| 26 | 6 | 3.980262  | -0.783698 | -1.395421 |
| 27 | 1 | 3.993494  | -0.672069 | -2.475848 |
| 28 | 8 | -1.601487 | -0.408738 | 1.308821  |
| 29 | 7 | -1.476081 | -0.626353 | -1.240927 |
| 30 | 1 | -1.401649 | -0.782591 | -2.246732 |
| 31 | 6 | -2.746694 | -0.650194 | 0.714973  |
| 32 | 6 | -2.725090 | -0.805077 | -0.712330 |
| 33 | 6 | -3.910569 | -1.112911 | -1.414725 |
| 34 | 1 | -3.876693 | -1.241893 | -2.495017 |
| 35 | 6 | -5.101030 | -1.242176 | -0.718539 |
| 36 | 1 | -6.018519 | -1.474976 | -1.251417 |
| 37 | 6 | -5.129000 | -1.072532 | 0.684580  |
| 38 | 1 | -6.072340 | -1.179725 | 1.213910  |
| 39 | 6 | -3.976384 | -0.778946 | 1.397994  |
| 40 | 1 | -3.989744 | -0.660224 | 2.477663  |

---

**K. (ap)<sub>2</sub>Os(PMe<sub>3</sub>) (with (ap)<sub>2</sub>Os(P) fragment constrained to C<sub>2</sub> symmetry)**

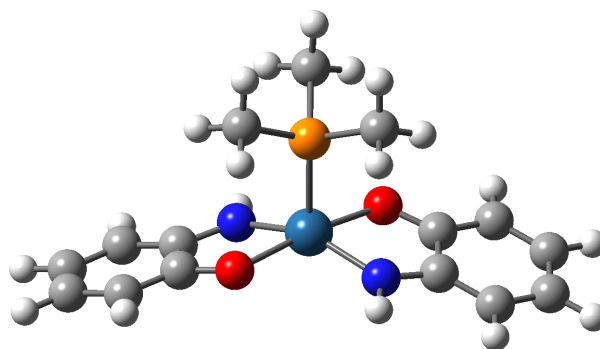

Energy of optimized structure = -1275.15251466 a.u.

\*One imaginary frequency (1.7i cm<sup>-1</sup>)

avg. MOS = -1.40(6)



Cartesian coordinates of optimized structure:

| Center<br>Number | Atomic<br>Number | Coordinates (Angstroms) |           |           |
|------------------|------------------|-------------------------|-----------|-----------|
|                  |                  | X                       | Y         | Z         |
| 1                | 76               | 0.002113                | -0.173787 | 0.000309  |
| 2                | 15               | 0.000532                | 2.103279  | -0.005728 |
| 3                | 6                | 1.484292                | 2.877100  | -0.770726 |
| 4                | 1                | 1.420614                | 3.970279  | -0.729309 |
| 5                | 1                | 1.564843                | 2.545080  | -1.808892 |
| 6                | 1                | 2.381875                | 2.544787  | -0.241127 |
| 7                | 6                | -0.105914               | 2.885268  | 1.662319  |
| 8                | 1                | -0.173774               | 3.977080  | 1.589404  |
| 9                | 1                | 0.781157                | 2.615113  | 2.242626  |
| 10               | 1                | -0.986552               | 2.492474  | 2.178211  |
| 11               | 6                | -1.427541               | 2.834123  | -0.911761 |
| 12               | 1                | -1.427129               | 3.925882  | -0.816952 |
| 13               | 1                | -2.359435               | 2.433131  | -0.503248 |
| 14               | 1                | -1.365589               | 2.556935  | -1.967354 |
| 15               | 8                | 1.639780                | -0.318889 | -1.300277 |
| 16               | 7                | 1.472410                | -0.608189 | 1.231259  |
| 17               | 1                | 1.374250                | -0.812724 | 2.226519  |
| 18               | 6                | 2.774184                | -0.627930 | -0.703952 |
| 19               | 6                | 2.729863                | -0.828105 | 0.710250  |
| 20               | 6                | 3.885062                | -1.209439 | 1.418012  |
| 21               | 1                | 3.830449                | -1.372214 | 2.492945  |
| 22               | 6                | 5.081415                | -1.364822 | 0.732447  |
| 23               | 1                | 5.980744                | -1.652744 | 1.269294  |
| 24               | 6                | 5.134081                | -1.150342 | -0.661206 |
| 25               | 1                | 6.078532                | -1.278683 | -1.183971 |
| 26               | 6                | 4.002095                | -0.786095 | -1.378613 |
| 27               | 1                | 4.034457                | -0.633030 | -2.453552 |
| 28               | 8                | -1.635357               | -0.314265 | 1.301652  |
| 29               | 7                | -1.467576               | -0.616751 | -1.228315 |
| 30               | 1                | -1.369129               | -0.826423 | -2.222477 |
| 31               | 6                | -2.769328               | -0.628037 | 0.706978  |
| 32               | 6                | -2.724724               | -0.835646 | -0.706143 |
| 33               | 6                | -3.879390               | -1.222331 | -1.411869 |
| 34               | 1                | -3.824547               | -1.390728 | -2.485924 |
| 35               | 6                | -5.075528               | -1.375738 | -0.725485 |
| 36               | 1                | -5.974455               | -1.667751 | -1.260794 |
| 37               | 6                | -5.128498               | -1.153944 | 0.667011  |
| 38               | 1                | -6.072771               | -1.280822 | 1.190453  |
| 39               | 6                | -3.997021               | -0.784328 | 1.382473  |
| 40               | 1                | -4.029600               | -0.625610 | 2.456585  |

**References**

- 
- S1 J. S. Siegel and F. A. L. Anet, *J. Org. Chem.*, 1988, **53**, 2629-2630.
- S2 A. J. Godó, A. C. Bényei, B. Duff, D. A. Egan and P. Buglyó, *RSC Adv.*, 2012, **2**, 1486-1495.
- S3 G. A. Abakumov, N. O. Druzhkov, Y. A. Kurskii and A. S. Shavyrin, *Russ. Chem. Bull.*, 2003, **52**, 712-717.
- S4 T. B. Ditri, A. E. Carpenter, D. S. Ripatti, C. E. Moore, A. L. Rheingold and J. S. Figueroa, *Inorg. Chem.*, 2013, **52**, 13216-13229.
- S5 N. G. Connelly and W. E. Geiger, *Chem. Rev.*, 1996, **96**, 877-910.
- S6 D. Lionetti, A. J. Medvecz, V. Ugrinova, M. Quiroz-Guzman, B. C. Noll and S. N. Brown, *Inorg. Chem.*, 2010, **49**, 4687-4697.
- S7 A. J. Gordon and R. A. Ford, *The Chemist's Companion*, John Wiley and Sons: New York, 1972, p. 303.
- S8 W. H. Sikorski, A. W. Sanders and H. J. Reich, *Magn. Reson. Chem.*, 1998, **36**, S118-2124.
- S9 M. J. Frisch, G. W. Trucks, H. B. Schlegel, G. E. Scuseria, M. A. Robb, J. R. Cheeseman, G. Scalmani, V. Barone, G. A. Petersson, H. Nakatsuji, X. Li, M. Caricato, A. V. Marenich, J. Bloino, B. G. Janesko, R. Gomperts, B. Mennucci, H. P. Hratchian, J. V. Ortiz, A. F. Izmaylov, J. L. Sonnenberg, D. Williams-Young, F. Ding, F. Lipparini, F. Egidi, J. Goings, B. Peng, A. Petrone, T. Henderson, D. Ranasinghe, V. G. Zakrzewski, J. Gao, N. Rega, G. Zheng, W. Liang, M. Hada, M. Ehara, K. Toyota, R. Fukuda, J. Hasegawa, M. Ishida, T. Nakajima, Y. Honda, O. Kitao, H. Nakai, T. Vreven, K. Throssell, J. A. Montgomery Jr., J. E. Peralta, F. Ogliaro, M. J. Bearpark, J. J. Heyd, E.

- 
- N. Brothers, K. N. Kudin, V. N. Staroverov, T. A. Keith, R. Kobayashi, J. Normand, K. Raghavachari, A. P. Rendell, J. C. Burant, S. S. Iyengar, J. Tomasi, M. Cossi, J. M. Millam, M. Klene, C. Adamo, R. Cammi, J. W. Ochterski, R. L. Martin, K. Morokuma, O. Farkas, J. B. Foresman and D. J. Fox, *Gaussian 16, Revision B.01*, Gaussian, Inc., Wallingford CT, 2016.
- S10 A. N. Erickson, J. Gianino, S. J. Markovitz and S. N. Brown, *Inorg. Chem.*, 2021, **60**, 4004-4014.
- S11 P. van der Sluis and A. L. Spek, *Acta Cryst.*, 1990, **A46**, 194-201.
- S12 G. M. Sheldrick, *Acta Cryst. A*, 2008, **A64**, 112-122.
- S13 A. J. C. Wilson, *International Tables for Crystallography*, Kluwer Academic Publishers, Dordrecht, The Netherlands, 1992, vol. C.
- S14 S. N. Brown, *Inorg. Chem.*, 2012, **51**, 1251-1260.
